# Supplementary material for: Utility of EST-SNP Markers for Improving Management and Use of Olive Genetic Resources: A Case Study at the Worldwide Olive Germplasm Bank of Córdoba
Source: MDPI journal article supplement (doi:10.3390/plants11070921), 2022-03-29

**Supplemental Table S7:** Proportion of genome of the 668 different genotypes assigned to the three clusters (gene pools) defined with the model-based clustering method from Pritchard *et al.* (2000) [75].

| Register Number | ORIGIN* | REGION | K=3** |       |       |
|-----------------|---------|--------|-------|-------|-------|
|                 |         |        | A     | B     | C     |
| 848             | CYP     | EM     | 0,922 | 0,025 | 0,053 |
| 721             | EGY     | EM     | 0,535 | 0,018 | 0,448 |
| 1737            | EGY     | EM     | 0,603 | 0,022 | 0,376 |
| 1094            | EGY     | EM     | 0,019 | 0,346 | 0,634 |
| 1750            | EGY     | EM     | 0,245 | 0,471 | 0,284 |
| 1739            | EGY     | EM     | 0,648 | 0,024 | 0,328 |
| 1744            | EGY     | EM     | 0,562 | 0,029 | 0,409 |
| 1754            | EGY     | EM     | 0,199 | 0,360 | 0,441 |
| 1753            | EGY     | EM     | 0,315 | 0,314 | 0,371 |
| 724             | EGY     | EM     | 0,408 | 0,412 | 0,180 |
| 725             | EGY     | EM     | 0,390 | 0,460 | 0,150 |
| 1742            | EGY     | EM     | 0,814 | 0,112 | 0,075 |
| 1738            | EGY     | EM     | 0,676 | 0,021 | 0,303 |
| 1749            | EGY     | EM     | 0,063 | 0,031 | 0,906 |
| 1741            | EGY     | EM     | 0,733 | 0,104 | 0,164 |
| 1745            | EGY     | EM     | 0,468 | 0,436 | 0,096 |
| 1747            | EGY     | EM     | 0,927 | 0,050 | 0,023 |
| 1748            | EGY     | EM     | 0,702 | 0,028 | 0,270 |
| 1099            | EGY     | EM     | 0,271 | 0,421 | 0,309 |
| 2167            | EGY     | EM     | 0,824 | 0,097 | 0,079 |
| 2169            | EGY     | EM     | 0,273 | 0,358 | 0,369 |
| 1139            | IRN     | EM     | 0,899 | 0,060 | 0,041 |
| 1810            | IRN     | EM     | 0,806 | 0,068 | 0,126 |
| 1141            | IRN     | EM     | 0,827 | 0,088 | 0,085 |
| 1142            | IRN     | EM     | 0,915 | 0,033 | 0,053 |
| 1140            | IRN     | EM     | 0,886 | 0,081 | 0,033 |
| 1143            | IRN     | EM     | 0,953 | 0,024 | 0,023 |
| 1856            | IRN     | EM     | 0,838 | 0,093 | 0,069 |
| 1854            | IRN     | EM     | 0,867 | 0,075 | 0,059 |
| 1853            | IRN     | EM     | 0,677 | 0,034 | 0,290 |
| 2278            | IRQ     | EM     | 0,652 | 0,052 | 0,296 |
| 2279            | IRQ     | EM     | 0,781 | 0,050 | 0,169 |
| 2280            | IRQ     | EM     | 0,742 | 0,141 | 0,117 |
| 158             | ISR     | EM     | 0,076 | 0,051 | 0,873 |
| 1165            | ISR     | EM     | 0,027 | 0,185 | 0,788 |
| 1970            | ISR     | EM     | 0,366 | 0,024 | 0,611 |
| 1972            | ISR     | EM     | 0,336 | 0,041 | 0,624 |
| 1971            | ISR     | EM     | 0,593 | 0,076 | 0,332 |
| 711             | ISR     | EM     | 0,238 | 0,421 | 0,341 |
| 120             | ISR     | EM     | 0,496 | 0,042 | 0,462 |
| 1808            | JOR     | EM     | 0,913 | 0,034 | 0,053 |
| 2254            | JOR     | EM     | 0,826 | 0,029 | 0,145 |
| 2261            | JOR     | EM     | 0,512 | 0,417 | 0,071 |

| Register Number | ORIGIN* | REGION | K=3** |       |       |
|-----------------|---------|--------|-------|-------|-------|
|                 |         |        | A     | B     | C     |
| 133             | LBN     | EM     | 0,869 | 0,036 | 0,095 |
| 2069            | LBN     | EM     | 0,923 | 0,055 | 0,022 |
| 2072            | LBN     | EM     | 0,872 | 0,101 | 0,027 |
| 2074            | LBN     | EM     | 0,889 | 0,057 | 0,055 |
| 2082            | LBN     | EM     | 0,817 | 0,085 | 0,098 |
| 787             | SYR     | EM     | 0,890 | 0,027 | 0,083 |
| 1010            | SYR     | EM     | 0,916 | 0,032 | 0,052 |
| 142             | SYR     | EM     | 0,973 | 0,015 | 0,012 |
| 1059            | SYR     | EM     | 0,915 | 0,019 | 0,066 |
| 140             | SYR     | EM     | 0,852 | 0,025 | 0,123 |
| 1054            | SYR     | EM     | 0,967 | 0,011 | 0,022 |
| 1043            | SYR     | EM     | 0,932 | 0,033 | 0,035 |
| 1794            | SYR     | EM     | 0,969 | 0,011 | 0,020 |
| 846             | SYR     | EM     | 0,952 | 0,026 | 0,022 |
| 1004            | SYR     | EM     | 0,970 | 0,011 | 0,019 |
| 788             | SYR     | EM     | 0,956 | 0,012 | 0,032 |
| 1562            | SYR     | EM     | 0,744 | 0,049 | 0,206 |
| 1000            | SYR     | EM     | 0,898 | 0,025 | 0,077 |
| 1572            | SYR     | EM     | 0,915 | 0,019 | 0,066 |
| 1568            | SYR     | EM     | 0,887 | 0,057 | 0,056 |
| 1557            | SYR     | EM     | 0,830 | 0,068 | 0,102 |
| 1780            | SYR     | EM     | 0,734 | 0,118 | 0,148 |
| 1788            | SYR     | EM     | 0,930 | 0,048 | 0,022 |
| 1786            | SYR     | EM     | 0,874 | 0,052 | 0,074 |
| 1034            | SYR     | EM     | 0,971 | 0,016 | 0,013 |
| 1115            | SYR     | EM     | 0,898 | 0,021 | 0,080 |
| 1605            | SYR     | EM     | 0,897 | 0,029 | 0,074 |
| 2058            | SYR     | EM     | 0,940 | 0,019 | 0,041 |
| 152             | SYR     | EM     | 0,736 | 0,167 | 0,097 |
| 145             | SYR     | EM     | 0,841 | 0,025 | 0,134 |
| 840             | SYR     | EM     | 0,969 | 0,014 | 0,017 |
| 1041            | SYR     | EM     | 0,804 | 0,074 | 0,122 |
| 842             | SYR     | EM     | 0,966 | 0,017 | 0,017 |
| 841             | SYR     | EM     | 0,965 | 0,017 | 0,018 |
| 1056            | SYR     | EM     | 0,924 | 0,024 | 0,052 |
| 990             | SYR     | EM     | 0,915 | 0,035 | 0,050 |
| 992             | SYR     | EM     | 0,602 | 0,373 | 0,025 |
| 1044            | SYR     | EM     | 0,965 | 0,012 | 0,023 |
| 1026            | SYR     | EM     | 0,850 | 0,113 | 0,037 |
| 1029            | SYR     | EM     | 0,944 | 0,013 | 0,043 |
| 1119            | SYR     | EM     | 0,934 | 0,017 | 0,050 |
| 1121            | SYR     | EM     | 0,955 | 0,018 | 0,027 |
| 1120            | SYR     | EM     | 0,883 | 0,036 | 0,082 |
| 1116            | SYR     | EM     | 0,910 | 0,047 | 0,043 |
| 1125            | SYR     | EM     | 0,947 | 0,018 | 0,035 |
| 1118            | SYR     | EM     | 0,824 | 0,024 | 0,152 |

| Register Number | ORIGIN* | REGION | K=3** |       |       |
|-----------------|---------|--------|-------|-------|-------|
|                 |         |        | A     | B     | C     |
| 1122            | SYR     | EM     | 0,967 | 0,013 | 0,021 |
| 1124            | SYR     | EM     | 0,872 | 0,050 | 0,078 |
| 2501            | SYR     | EM     | 0,912 | 0,043 | 0,045 |
| 1002            | SYR     | EM     | 0,839 | 0,124 | 0,037 |
| 1559            | SYR     | EM     | 0,878 | 0,018 | 0,104 |
| 1561            | SYR     | EM     | 0,902 | 0,018 | 0,080 |
| 1563            | SYR     | EM     | 0,947 | 0,027 | 0,026 |
| 1564            | SYR     | EM     | 0,897 | 0,020 | 0,084 |
| 1595            | SYR     | EM     | 0,954 | 0,020 | 0,026 |
| 1599            | SYR     | EM     | 0,917 | 0,023 | 0,060 |
| 1600            | SYR     | EM     | 0,425 | 0,243 | 0,333 |
| 1602            | SYR     | EM     | 0,801 | 0,026 | 0,174 |
| 1606            | SYR     | EM     | 0,746 | 0,030 | 0,225 |
| 1607            | SYR     | EM     | 0,924 | 0,024 | 0,052 |
| 1609            | SYR     | EM     | 0,874 | 0,019 | 0,106 |
| 1613            | SYR     | EM     | 0,908 | 0,043 | 0,049 |
| 1615            | SYR     | EM     | 0,969 | 0,017 | 0,014 |
| 1616            | SYR     | EM     | 0,968 | 0,019 | 0,013 |
| 1617            | SYR     | EM     | 0,933 | 0,043 | 0,025 |
| 1618            | SYR     | EM     | 0,915 | 0,019 | 0,066 |
| 1623            | SYR     | EM     | 0,961 | 0,016 | 0,023 |
| 1624            | SYR     | EM     | 0,960 | 0,025 | 0,015 |
| 1628            | SYR     | EM     | 0,850 | 0,027 | 0,123 |
| 2057            | SYR     | EM     | 0,780 | 0,038 | 0,182 |
| 685             | TUR     | EM     | 0,870 | 0,093 | 0,037 |
| 97              | TUR     | EM     | 0,662 | 0,321 | 0,018 |
| 93              | TUR     | EM     | 0,880 | 0,021 | 0,099 |
| 690             | TUR     | EM     | 0,866 | 0,105 | 0,030 |
| 92              | TUR     | EM     | 0,594 | 0,017 | 0,389 |
| 686             | TUR     | EM     | 0,794 | 0,025 | 0,181 |
| 679             | TUR     | EM     | 0,527 | 0,039 | 0,433 |
| 688             | TUR     | EM     | 0,855 | 0,108 | 0,036 |
| 95              | TUR     | EM     | 0,355 | 0,024 | 0,621 |
| 99              | TUR     | EM     | 0,778 | 0,025 | 0,197 |
| 94              | TUR     | EM     | 0,804 | 0,164 | 0,032 |
| 2318            | TUR     | EM     | 0,678 | 0,090 | 0,232 |
| 2290            | TUR     | EM     | 0,587 | 0,032 | 0,381 |
| 2291            | TUR     | EM     | 0,655 | 0,025 | 0,320 |
| 2292            | TUR     | EM     | 0,608 | 0,020 | 0,372 |
| 2317            | TUR     | EM     | 0,728 | 0,054 | 0,218 |
| 2295            | TUR     | EM     | 0,453 | 0,023 | 0,524 |
| 2297            | TUR     | EM     | 0,617 | 0,027 | 0,356 |
| 2298            | TUR     | EM     | 0,412 | 0,040 | 0,548 |
| 2300            | TUR     | EM     | 0,487 | 0,017 | 0,496 |
| 2304            | TUR     | EM     | 0,531 | 0,029 | 0,440 |
| 2306            | TUR     | EM     | 0,751 | 0,019 | 0,230 |

| Register Number | ORIGIN* | REGION | K=3** |       |       |
|-----------------|---------|--------|-------|-------|-------|
|                 |         |        | A     | B     | C     |
| 2311            | TUR     | EM     | 0,529 | 0,016 | 0,455 |
| 2315            | TUR     | EM     | 0,666 | 0,044 | 0,290 |
| 2316            | TUR     | EM     | 0,502 | 0,013 | 0,485 |
| 2319            | TUR     | EM     | 0,900 | 0,051 | 0,049 |
| 2329            | TUR     | EM     | 0,862 | 0,023 | 0,115 |
| 2332            | TUR     | EM     | 0,581 | 0,245 | 0,174 |
| 2336            | TUR     | EM     | 0,962 | 0,018 | 0,020 |
| 2338            | TUR     | EM     | 0,936 | 0,019 | 0,045 |
| 2340            | TUR     | EM     | 0,892 | 0,021 | 0,087 |
| 2341            | TUR     | EM     | 0,900 | 0,025 | 0,075 |
| 2343            | TUR     | EM     | 0,942 | 0,034 | 0,024 |
| 2344            | TUR     | EM     | 0,947 | 0,024 | 0,030 |
| 2345            | TUR     | EM     | 0,836 | 0,061 | 0,103 |
| 2347            | TUR     | EM     | 0,658 | 0,230 | 0,113 |
| 2349            | TUR     | EM     | 0,882 | 0,041 | 0,077 |
| 2351            | TUR     | EM     | 0,630 | 0,027 | 0,343 |
| 2359            | TUR     | EM     | 0,940 | 0,036 | 0,024 |
| 2363            | TUR     | EM     | 0,767 | 0,211 | 0,023 |
| 2364            | TUR     | EM     | 0,526 | 0,063 | 0,411 |
| 2365            | TUR     | EM     | 0,083 | 0,027 | 0,890 |
| 1082            | ALB     | CM     | 0,809 | 0,177 | 0,014 |
| 1079            | ALB     | CM     | 0,839 | 0,141 | 0,020 |
| 1081            | ALB     | CM     | 0,031 | 0,567 | 0,403 |
| 1077            | ALB     | CM     | 0,762 | 0,222 | 0,017 |
| 2499            | ALB     | CM     | 0,057 | 0,883 | 0,060 |
| 1812            | ALB     | CM     | 0,175 | 0,773 | 0,052 |
| 1078            | ALB     | CM     | 0,430 | 0,358 | 0,213 |
| 1151            | ALB     | CM     | 0,592 | 0,378 | 0,030 |
| 1171            | ALB     | CM     | 0,771 | 0,153 | 0,076 |
| 1716            | ALB     | CM     | 0,879 | 0,103 | 0,019 |
| 1714            | ALB     | CM     | 0,074 | 0,333 | 0,593 |
| 1711            | ALB     | CM     | 0,512 | 0,471 | 0,018 |
| 2268            | ALB     | CM     | 0,337 | 0,614 | 0,049 |
| 2270            | ALB     | CM     | 0,458 | 0,501 | 0,041 |
| 1537            | DZA     | CM     | 0,724 | 0,070 | 0,206 |
| 1655            | DZA     | CM     | 0,030 | 0,948 | 0,022 |
| 1541            | DZA     | CM     | 0,045 | 0,636 | 0,319 |
| 1542            | DZA     | CM     | 0,659 | 0,079 | 0,261 |
| 1525            | DZA     | CM     | 0,601 | 0,015 | 0,384 |
| 1523            | DZA     | CM     | 0,037 | 0,490 | 0,473 |
| 1638            | DZA     | CM     | 0,544 | 0,414 | 0,042 |
| 1659            | DZA     | CM     | 0,045 | 0,479 | 0,477 |
| 1634            | DZA     | CM     | 0,067 | 0,342 | 0,591 |
| 1948            | DZA     | CM     | 0,292 | 0,382 | 0,326 |
| 1947            | DZA     | CM     | 0,116 | 0,832 | 0,052 |
| 1530            | DZA     | CM     | 0,516 | 0,040 | 0,443 |

| Register Number | ORIGIN* | REGION | K=3** |       |       |
|-----------------|---------|--------|-------|-------|-------|
|                 |         |        | A     | B     | C     |
| 1951            | DZA     | CM     | 0,141 | 0,710 | 0,149 |
| 118             | DZA     | CM     | 0,024 | 0,611 | 0,365 |
| 1513            | DZA     | CM     | 0,057 | 0,899 | 0,044 |
| 1539            | DZA     | CM     | 0,605 | 0,063 | 0,332 |
| 1543            | DZA     | CM     | 0,216 | 0,331 | 0,454 |
| 2500            | DZA     | CM     | 0,071 | 0,877 | 0,052 |
| 1518            | DZA     | CM     | 0,049 | 0,733 | 0,218 |
| 1548            | DZA     | CM     | 0,244 | 0,651 | 0,105 |
| 1549            | DZA     | CM     | 0,266 | 0,635 | 0,099 |
| 1516            | DZA     | CM     | 0,469 | 0,025 | 0,506 |
| 1534            | DZA     | CM     | 0,442 | 0,052 | 0,506 |
| 1529            | DZA     | CM     | 0,029 | 0,947 | 0,024 |
| 1524            | DZA     | CM     | 0,095 | 0,871 | 0,034 |
| 1547            | DZA     | CM     | 0,073 | 0,561 | 0,366 |
| 1850            | DZA     | CM     | 0,041 | 0,919 | 0,040 |
| 1849            | DZA     | CM     | 0,019 | 0,955 | 0,026 |
| 695             | GRC     | CM     | 0,620 | 0,037 | 0,344 |
| 219             | GRC     | CM     | 0,670 | 0,025 | 0,306 |
| 692             | GRC     | CM     | 0,934 | 0,048 | 0,018 |
| 103             | GRC     | CM     | 0,806 | 0,090 | 0,104 |
| 228             | GRC     | CM     | 0,630 | 0,093 | 0,277 |
| 699             | GRC     | CM     | 0,169 | 0,756 | 0,075 |
| 1385            | GRC     | CM     | 0,877 | 0,109 | 0,015 |
| 2227            | GRC     | CM     | 0,280 | 0,692 | 0,028 |
| 1394            | GRC     | CM     | 0,264 | 0,589 | 0,147 |
| 1392            | GRC     | CM     | 0,071 | 0,684 | 0,245 |
| 218             | GRC     | CM     | 0,062 | 0,899 | 0,039 |
| 1681            | GRC     | CM     | 0,209 | 0,284 | 0,507 |
| 345             | GRC     | CM     | 0,296 | 0,685 | 0,019 |
| 694             | GRC     | CM     | 0,016 | 0,966 | 0,018 |
| 105             | GRC     | CM     | 0,302 | 0,120 | 0,578 |
| 702             | GRC     | CM     | 0,709 | 0,157 | 0,135 |
| 691             | GRC     | CM     | 0,052 | 0,259 | 0,689 |
| 220             | GRC     | CM     | 0,611 | 0,036 | 0,354 |
| 2206            | GRC     | CM     | 0,683 | 0,234 | 0,083 |
| 2207            | GRC     | CM     | 0,512 | 0,038 | 0,451 |
| 2208            | GRC     | CM     | 0,895 | 0,037 | 0,067 |
| 2209            | GRC     | CM     | 0,271 | 0,591 | 0,138 |
| 2212            | GRC     | CM     | 0,382 | 0,499 | 0,119 |
| 2234            | GRC     | CM     | 0,712 | 0,041 | 0,248 |
| 2236            | GRC     | CM     | 0,656 | 0,020 | 0,324 |
| 2237            | GRC     | CM     | 0,080 | 0,883 | 0,037 |
| 2238            | GRC     | CM     | 0,657 | 0,014 | 0,330 |
| 2239            | GRC     | CM     | 0,699 | 0,035 | 0,266 |
| 1990            | HRV     | CM     | 0,407 | 0,497 | 0,096 |
| 1982            | HRV     | CM     | 0,094 | 0,480 | 0,427 |

| Register Number | ORIGIN* | REGION | K=3** |       |       |
|-----------------|---------|--------|-------|-------|-------|
|                 |         |        | A     | B     | C     |
| 1991            | HRV     | CM     | 0,054 | 0,703 | 0,243 |
| 1974            | HRV     | CM     | 0,475 | 0,064 | 0,461 |
| 1987            | HRV     | CM     | 0,289 | 0,053 | 0,658 |
| 1985            | HRV     | CM     | 0,362 | 0,598 | 0,040 |
| 733             | HRV     | CM     | 0,304 | 0,051 | 0,645 |
| 1977            | HRV     | CM     | 0,304 | 0,598 | 0,098 |
| 1979            | HRV     | CM     | 0,125 | 0,110 | 0,765 |
| 1981            | HRV     | CM     | 0,020 | 0,447 | 0,533 |
| 1986            | HRV     | CM     | 0,280 | 0,038 | 0,682 |
| 1978            | HRV     | CM     | 0,255 | 0,063 | 0,682 |
| 2005            | HRV     | CM     | 0,082 | 0,580 | 0,337 |
| 703             | HRV     | CM     | 0,048 | 0,363 | 0,590 |
| 704             | HRV     | CM     | 0,344 | 0,608 | 0,048 |
| 706             | HRV     | CM     | 0,290 | 0,161 | 0,548 |
| 734             | HRV     | CM     | 0,155 | 0,464 | 0,381 |
| 2387            | HRV     | CM     | 0,179 | 0,045 | 0,776 |
| 2390            | HRV     | CM     | 0,276 | 0,366 | 0,358 |
| 2388            | HRV     | CM     | 0,046 | 0,569 | 0,385 |
| 1349            | ITA     | CM     | 0,584 | 0,035 | 0,381 |
| 1227            | ITA     | CM     | 0,266 | 0,575 | 0,159 |
| 1269            | ITA     | CM     | 0,094 | 0,537 | 0,369 |
| 85              | ITA     | CM     | 0,256 | 0,670 | 0,074 |
| 1254            | ITA     | CM     | 0,408 | 0,531 | 0,061 |
| 87              | ITA     | CM     | 0,075 | 0,564 | 0,361 |
| 80              | ITA     | CM     | 0,066 | 0,901 | 0,033 |
| 1268            | ITA     | CM     | 0,522 | 0,024 | 0,454 |
| 68              | ITA     | CM     | 0,430 | 0,055 | 0,515 |
| 1348            | ITA     | CM     | 0,222 | 0,703 | 0,075 |
| 1189            | ITA     | CM     | 0,197 | 0,579 | 0,224 |
| 1236            | ITA     | CM     | 0,251 | 0,698 | 0,051 |
| 1194            | ITA     | CM     | 0,658 | 0,308 | 0,034 |
| 88              | ITA     | CM     | 0,192 | 0,726 | 0,082 |
| 1210            | ITA     | CM     | 0,273 | 0,673 | 0,054 |
| 82              | ITA     | CM     | 0,129 | 0,590 | 0,281 |
| 84              | ITA     | CM     | 0,098 | 0,667 | 0,236 |
| 1253            | ITA     | CM     | 0,084 | 0,110 | 0,806 |
| 1170            | ITA     | CM     | 0,351 | 0,589 | 0,061 |
| 1239            | ITA     | CM     | 0,086 | 0,345 | 0,570 |
| 1247            | ITA     | CM     | 0,420 | 0,268 | 0,312 |
| 75              | ITA     | CM     | 0,580 | 0,019 | 0,401 |
| 1241            | ITA     | CM     | 0,196 | 0,405 | 0,399 |
| 1323            | ITA     | CM     | 0,308 | 0,054 | 0,638 |
| 1352            | ITA     | CM     | 0,497 | 0,021 | 0,482 |
| 1280            | ITA     | CM     | 0,304 | 0,071 | 0,625 |
| 62              | ITA     | CM     | 0,373 | 0,033 | 0,594 |
| 1304            | ITA     | CM     | 0,022 | 0,445 | 0,533 |

| Register Number | ORIGIN* | REGION | K=3** |       |       |
|-----------------|---------|--------|-------|-------|-------|
|                 |         |        | A     | B     | C     |
| 1341            | ITA     | CM     | 0,442 | 0,138 | 0,421 |
| 1267            | ITA     | CM     | 0,624 | 0,142 | 0,234 |
| 736             | ITA     | CM     | 0,574 | 0,019 | 0,407 |
| 79              | ITA     | CM     | 0,042 | 0,524 | 0,434 |
| 1324            | ITA     | CM     | 0,492 | 0,045 | 0,464 |
| 1340            | ITA     | CM     | 0,346 | 0,042 | 0,612 |
| 1277            | ITA     | CM     | 0,020 | 0,032 | 0,948 |
| 1255            | ITA     | CM     | 0,279 | 0,279 | 0,443 |
| 1332            | ITA     | CM     | 0,061 | 0,390 | 0,549 |
| 1337            | ITA     | CM     | 0,537 | 0,054 | 0,409 |
| 1211            | ITA     | CM     | 0,208 | 0,619 | 0,172 |
| 1329            | ITA     | CM     | 0,102 | 0,075 | 0,823 |
| 1350            | ITA     | CM     | 0,490 | 0,456 | 0,053 |
| 1334            | ITA     | CM     | 0,135 | 0,403 | 0,462 |
| 1193            | ITA     | CM     | 0,231 | 0,440 | 0,329 |
| 1250            | ITA     | CM     | 0,132 | 0,673 | 0,195 |
| 90              | ITA     | CM     | 0,562 | 0,300 | 0,138 |
| 1271            | ITA     | CM     | 0,398 | 0,582 | 0,021 |
| 1331            | ITA     | CM     | 0,280 | 0,457 | 0,263 |
| 1327            | ITA     | CM     | 0,006 | 0,982 | 0,012 |
| 77              | ITA     | CM     | 0,022 | 0,938 | 0,040 |
| 1325            | ITA     | CM     | 0,910 | 0,059 | 0,031 |
| 1328            | ITA     | CM     | 0,661 | 0,017 | 0,322 |
| 1207            | ITA     | CM     | 0,126 | 0,349 | 0,525 |
| 1219            | ITA     | CM     | 0,161 | 0,553 | 0,287 |
| 1222            | ITA     | CM     | 0,025 | 0,877 | 0,098 |
| 1187            | ITA     | CM     | 0,248 | 0,503 | 0,249 |
| 1224            | ITA     | CM     | 0,254 | 0,071 | 0,675 |
| 1226            | ITA     | CM     | 0,047 | 0,513 | 0,440 |
| 1223            | ITA     | CM     | 0,081 | 0,865 | 0,054 |
| 1188            | ITA     | CM     | 0,198 | 0,696 | 0,106 |
| 1342            | ITA     | CM     | 0,527 | 0,027 | 0,446 |
| 1203            | ITA     | CM     | 0,125 | 0,589 | 0,286 |
| 1230            | ITA     | CM     | 0,139 | 0,668 | 0,193 |
| 1221            | ITA     | CM     | 0,039 | 0,871 | 0,091 |
| 1216            | ITA     | CM     | 0,093 | 0,761 | 0,147 |
| 1215            | ITA     | CM     | 0,042 | 0,562 | 0,396 |
| 1212            | ITA     | CM     | 0,381 | 0,566 | 0,053 |
| 1225            | ITA     | CM     | 0,038 | 0,434 | 0,529 |
| 1195            | ITA     | CM     | 0,534 | 0,381 | 0,085 |
| 1353            | ITA     | CM     | 0,132 | 0,464 | 0,405 |
| 1322            | ITA     | CM     | 0,548 | 0,038 | 0,413 |
| 1201            | ITA     | CM     | 0,104 | 0,529 | 0,368 |
| 2018            | ITA     | CM     | 0,012 | 0,944 | 0,044 |
| 65              | ITA     | CM     | 0,352 | 0,610 | 0,038 |
| 893             | ITA     | CM     | 0,048 | 0,818 | 0,134 |



| Register Number | ORIGIN* | REGION | K=3** |       |       |
|-----------------|---------|--------|-------|-------|-------|
|                 |         |        | A     | B     | C     |
| 1270            | ITA     | CM     | 0,066 | 0,858 | 0,076 |
| 2496            | ITA     | CM     | 0,096 | 0,490 | 0,414 |
| 1994            | MNE     | CM     | 0,374 | 0,477 | 0,149 |
| 1995            | MNE     | CM     | 0,811 | 0,166 | 0,023 |
| 1997            | MNE     | CM     | 0,302 | 0,646 | 0,052 |
| 1999            | MNE     | CM     | 0,639 | 0,341 | 0,020 |
| 2273            | SVN     | CM     | 0,440 | 0,144 | 0,416 |
| 115             | TUN     | CM     | 0,898 | 0,017 | 0,085 |
| 113             | TUN     | CM     | 0,274 | 0,239 | 0,487 |
| 538             | TUN     | CM     | 0,926 | 0,028 | 0,046 |
| 1674            | TUN     | CM     | 0,636 | 0,334 | 0,030 |
| 1872            | TUN     | CM     | 0,302 | 0,558 | 0,141 |
| 1725            | TUN     | CM     | 0,623 | 0,043 | 0,334 |
| 1509            | TUN     | CM     | 0,542 | 0,109 | 0,349 |
| 1683            | TUN     | CM     | 0,547 | 0,432 | 0,022 |
| 1661            | TUN     | CM     | 0,161 | 0,028 | 0,811 |
| 1684            | TUN     | CM     | 0,187 | 0,501 | 0,312 |
| 1832            | TUN     | CM     | 0,685 | 0,275 | 0,040 |
| 1871            | TUN     | CM     | 0,034 | 0,937 | 0,029 |
| 1917            | TUN     | CM     | 0,579 | 0,067 | 0,355 |
| 1680            | TUN     | CM     | 0,227 | 0,555 | 0,218 |
| 1893            | TUN     | CM     | 0,023 | 0,950 | 0,027 |
| 1873            | TUN     | CM     | 0,299 | 0,558 | 0,143 |
| 1898            | TUN     | CM     | 0,023 | 0,957 | 0,020 |
| 1908            | TUN     | CM     | 0,711 | 0,256 | 0,034 |
| 1670            | TUN     | CM     | 0,104 | 0,269 | 0,626 |
| 1887            | TUN     | CM     | 0,015 | 0,959 | 0,026 |
| 1864            | TUN     | CM     | 0,055 | 0,537 | 0,408 |
| 1511            | TUN     | CM     | 0,053 | 0,804 | 0,143 |
| 1888            | TUN     | CM     | 0,023 | 0,939 | 0,038 |
| 1890            | TUN     | CM     | 0,016 | 0,963 | 0,021 |
| 1912            | TUN     | CM     | 0,019 | 0,950 | 0,031 |
| 1869            | TUN     | CM     | 0,018 | 0,961 | 0,021 |
| 1889            | TUN     | CM     | 0,658 | 0,244 | 0,099 |
| 1914            | TUN     | CM     | 0,072 | 0,540 | 0,388 |
| 1876            | TUN     | CM     | 0,012 | 0,973 | 0,015 |
| 1910            | TUN     | CM     | 0,037 | 0,941 | 0,022 |
| 1916            | TUN     | CM     | 0,154 | 0,738 | 0,108 |
| 1728            | TUN     | CM     | 0,046 | 0,259 | 0,695 |
| 1732            | TUN     | CM     | 0,017 | 0,967 | 0,016 |
| 114             | TUN     | CM     | 0,236 | 0,743 | 0,021 |
| 1902            | TUN     | CM     | 0,069 | 0,825 | 0,106 |
| 1825            | TUN     | CM     | 0,023 | 0,962 | 0,015 |
| 1675            | TUN     | CM     | 0,774 | 0,115 | 0,111 |
| 539             | TUN     | CM     | 0,008 | 0,977 | 0,015 |
| 1918            | TUN     | CM     | 0,051 | 0,557 | 0,393 |



| Register Number | ORIGIN* | REGION | K=3** |       |       |
|-----------------|---------|--------|-------|-------|-------|
|                 |         |        | A     | B     | C     |
| 1907            | TUN     | CM     | 0,253 | 0,716 | 0,032 |
| 1899            | TUN     | CM     | 0,017 | 0,967 | 0,016 |
| 1827            | TUN     | CM     | 0,022 | 0,963 | 0,015 |
| 1814            | ARG     | WM     | 0,458 | 0,021 | 0,521 |
| 829             | ARG     | WM     | 0,087 | 0,050 | 0,863 |
| 726             | CHL     | WM     | 0,028 | 0,025 | 0,947 |
| 1451            | CHL     | WM     | 0,038 | 0,361 | 0,601 |
| 1459            | CHL     | WM     | 0,033 | 0,939 | 0,028 |
| 1457            | CHL     | WM     | 0,040 | 0,075 | 0,885 |
| 1455            | CHL     | WM     | 0,127 | 0,287 | 0,586 |
| 9               | ESP     | WM     | 0,073 | 0,080 | 0,847 |
| 54              | ESP     | WM     | 0,052 | 0,508 | 0,440 |
| 5               | ESP     | WM     | 0,029 | 0,356 | 0,616 |
| 753             | ESP     | WM     | 0,031 | 0,073 | 0,895 |
| 877             | ESP     | WM     | 0,026 | 0,071 | 0,903 |
| 39              | ESP     | WM     | 0,126 | 0,023 | 0,851 |
| 234             | ESP     | WM     | 0,056 | 0,008 | 0,936 |
| 562             | ESP     | WM     | 0,066 | 0,502 | 0,432 |
| 770             | ESP     | WM     | 0,068 | 0,025 | 0,907 |
| 414             | ESP     | WM     | 0,035 | 0,059 | 0,907 |
| 35              | ESP     | WM     | 0,057 | 0,063 | 0,880 |
| 384             | ESP     | WM     | 0,042 | 0,060 | 0,899 |
| 44              | ESP     | WM     | 0,080 | 0,063 | 0,857 |
| 2               | ESP     | WM     | 0,021 | 0,033 | 0,946 |
| 27              | ESP     | WM     | 0,142 | 0,085 | 0,773 |
| 781             | ESP     | WM     | 0,136 | 0,267 | 0,597 |
| 394             | ESP     | WM     | 0,053 | 0,057 | 0,890 |
| 60              | ESP     | WM     | 0,103 | 0,066 | 0,832 |
| 756             | ESP     | WM     | 0,041 | 0,030 | 0,929 |
| 1373            | ESP     | WM     | 0,231 | 0,058 | 0,711 |
| 46              | ESP     | WM     | 0,932 | 0,033 | 0,035 |
| 749             | ESP     | WM     | 0,324 | 0,037 | 0,640 |
| 784             | ESP     | WM     | 0,065 | 0,057 | 0,879 |
| 779             | ESP     | WM     | 0,032 | 0,095 | 0,873 |
| 406             | ESP     | WM     | 0,042 | 0,082 | 0,876 |
| 51              | ESP     | WM     | 0,263 | 0,024 | 0,714 |
| 31              | ESP     | WM     | 0,023 | 0,091 | 0,886 |
| 309             | ESP     | WM     | 0,071 | 0,137 | 0,792 |
| 282             | ESP     | WM     | 0,054 | 0,026 | 0,920 |
| 669             | ESP     | WM     | 0,270 | 0,638 | 0,092 |
| 21              | ESP     | WM     | 0,051 | 0,028 | 0,921 |
| 1717            | ESP     | WM     | 0,310 | 0,590 | 0,100 |
| 1365            | ESP     | WM     | 0,064 | 0,081 | 0,856 |
| 1372            | ESP     | WM     | 0,127 | 0,042 | 0,831 |
| 970             | ESP     | WM     | 0,507 | 0,050 | 0,443 |
| 10              | ESP     | WM     | 0,057 | 0,042 | 0,901 |

| Register Number | ORIGIN* | REGION | K=3** |       |       |
|-----------------|---------|--------|-------|-------|-------|
|                 |         |        | A     | B     | C     |
| 1369            | ESP     | WM     | 0,483 | 0,105 | 0,412 |
| 965             | ESP     | WM     | 0,373 | 0,124 | 0,502 |
| 607             | ESP     | WM     | 0,074 | 0,028 | 0,899 |
| 1481            | ESP     | WM     | 0,060 | 0,017 | 0,923 |
| 224             | ESP     | WM     | 0,542 | 0,382 | 0,076 |
| 567             | ESP     | WM     | 0,054 | 0,155 | 0,791 |
| 768             | ESP     | WM     | 0,057 | 0,114 | 0,829 |
| 817             | ESP     | WM     | 0,167 | 0,665 | 0,169 |
| 1182            | ESP     | WM     | 0,284 | 0,076 | 0,640 |
| 26              | ESP     | WM     | 0,081 | 0,030 | 0,889 |
| 11              | ESP     | WM     | 0,360 | 0,616 | 0,024 |
| 227             | ESP     | WM     | 0,065 | 0,100 | 0,835 |
| 15              | ESP     | WM     | 0,185 | 0,261 | 0,555 |
| 757             | ESP     | WM     | 0,057 | 0,638 | 0,305 |
| 370             | ESP     | WM     | 0,112 | 0,044 | 0,844 |
| 41              | ESP     | WM     | 0,292 | 0,583 | 0,125 |
| 6               | ESP     | WM     | 0,042 | 0,070 | 0,888 |
| 306             | ESP     | WM     | 0,038 | 0,079 | 0,884 |
| 231             | ESP     | WM     | 0,256 | 0,723 | 0,021 |
| 1923            | ESP     | WM     | 0,336 | 0,417 | 0,248 |
| 790             | ESP     | WM     | 0,047 | 0,038 | 0,915 |
| 1818            | ESP     | WM     | 0,063 | 0,034 | 0,903 |
| 665             | ESP     | WM     | 0,350 | 0,463 | 0,187 |
| 256             | ESP     | WM     | 0,055 | 0,064 | 0,881 |
| 489             | ESP     | WM     | 0,052 | 0,062 | 0,885 |
| 255             | ESP     | WM     | 0,027 | 0,033 | 0,940 |
| 2022            | ESP     | WM     | 0,393 | 0,076 | 0,531 |
| 12              | ESP     | WM     | 0,350 | 0,570 | 0,080 |
| 2020            | ESP     | WM     | 0,544 | 0,146 | 0,310 |
| 2030            | ESP     | WM     | 0,511 | 0,459 | 0,030 |
| 2017            | ESP     | WM     | 0,179 | 0,167 | 0,653 |
| 2021            | ESP     | WM     | 0,522 | 0,426 | 0,052 |
| 2024            | ESP     | WM     | 0,645 | 0,034 | 0,321 |
| 16              | ESP     | WM     | 0,473 | 0,046 | 0,482 |
| 758             | ESP     | WM     | 0,046 | 0,069 | 0,884 |
| 645             | ESP     | WM     | 0,281 | 0,253 | 0,466 |
| 390             | ESP     | WM     | 0,259 | 0,032 | 0,709 |
| 226             | ESP     | WM     | 0,351 | 0,590 | 0,059 |
| 55              | ESP     | WM     | 0,070 | 0,049 | 0,881 |
| 2027            | ESP     | WM     | 0,668 | 0,078 | 0,254 |
| 2026            | ESP     | WM     | 0,486 | 0,273 | 0,241 |
| 1973            | ESP     | WM     | 0,487 | 0,467 | 0,046 |
| 2044            | ESP     | WM     | 0,613 | 0,180 | 0,207 |
| 2041            | ESP     | WM     | 0,529 | 0,035 | 0,436 |
| 2035            | ESP     | WM     | 0,586 | 0,157 | 0,256 |
| 366             | ESP     | WM     | 0,073 | 0,142 | 0,784 |

| Register Number | ORIGIN* | REGION | K=3** |       |       |
|-----------------|---------|--------|-------|-------|-------|
|                 |         |        | A     | B     | C     |
| 285             | ESP     | WM     | 0,050 | 0,078 | 0,873 |
| 2034            | ESP     | WM     | 0,494 | 0,049 | 0,457 |
| 2029            | ESP     | WM     | 0,943 | 0,043 | 0,014 |
| 2032            | ESP     | WM     | 0,668 | 0,051 | 0,281 |
| 2248            | ESP     | WM     | 0,318 | 0,330 | 0,352 |
| 2040            | ESP     | WM     | 0,388 | 0,078 | 0,534 |
| 2036            | ESP     | WM     | 0,430 | 0,055 | 0,515 |
| 663             | ESP     | WM     | 0,483 | 0,104 | 0,413 |
| 674             | ESP     | WM     | 0,219 | 0,496 | 0,285 |
| 333             | ESP     | WM     | 0,027 | 0,061 | 0,912 |
| 286             | ESP     | WM     | 0,070 | 0,042 | 0,889 |
| 3               | ESP     | WM     | 0,062 | 0,124 | 0,813 |
| 47              | ESP     | WM     | 0,730 | 0,254 | 0,016 |
| 23              | ESP     | WM     | 0,034 | 0,093 | 0,872 |
| 652             | ESP     | WM     | 0,104 | 0,311 | 0,585 |
| 593             | ESP     | WM     | 0,035 | 0,053 | 0,912 |
| 270             | ESP     | WM     | 0,023 | 0,131 | 0,846 |
| 297             | ESP     | WM     | 0,061 | 0,037 | 0,902 |
| 664             | ESP     | WM     | 0,113 | 0,571 | 0,316 |
| 677             | ESP     | WM     | 0,284 | 0,636 | 0,079 |
| 534             | ESP     | WM     | 0,060 | 0,038 | 0,903 |
| 371             | ESP     | WM     | 0,028 | 0,031 | 0,941 |
| 605             | ESP     | WM     | 0,062 | 0,056 | 0,883 |
| 123             | ESP     | WM     | 0,086 | 0,042 | 0,872 |
| 591             | ESP     | WM     | 0,164 | 0,040 | 0,796 |
| 750             | ESP     | WM     | 0,037 | 0,060 | 0,903 |
| 367             | ESP     | WM     | 0,464 | 0,097 | 0,440 |
| 305             | ESP     | WM     | 0,036 | 0,053 | 0,911 |
| 667             | ESP     | WM     | 0,087 | 0,812 | 0,101 |
| 653             | ESP     | WM     | 0,076 | 0,386 | 0,538 |
| 576             | ESP     | WM     | 0,040 | 0,047 | 0,913 |
| 666             | ESP     | WM     | 0,147 | 0,687 | 0,166 |
| 410             | ESP     | WM     | 0,083 | 0,025 | 0,892 |
| 269             | ESP     | WM     | 0,076 | 0,022 | 0,902 |
| 295             | ESP     | WM     | 0,035 | 0,085 | 0,880 |
| 17              | ESP     | WM     | 0,082 | 0,075 | 0,844 |
| 661             | ESP     | WM     | 0,262 | 0,591 | 0,147 |
| 613             | ESP     | WM     | 0,280 | 0,580 | 0,140 |
| 440             | ESP     | WM     | 0,123 | 0,023 | 0,854 |
| 20              | ESP     | WM     | 0,513 | 0,026 | 0,461 |
| 34              | ESP     | WM     | 0,162 | 0,052 | 0,787 |
| 273             | ESP     | WM     | 0,025 | 0,040 | 0,935 |
| 358             | ESP     | WM     | 0,028 | 0,143 | 0,829 |
| 437             | ESP     | WM     | 0,054 | 0,058 | 0,888 |
| 561             | ESP     | WM     | 0,080 | 0,107 | 0,813 |
| 418             | ESP     | WM     | 0,034 | 0,025 | 0,941 |

| Register Number | ORIGIN* | REGION | K=3** |       |       |
|-----------------|---------|--------|-------|-------|-------|
|                 |         |        | A     | B     | C     |
| 403             | ESP     | WM     | 0,120 | 0,031 | 0,849 |
| 372             | ESP     | WM     | 0,045 | 0,047 | 0,908 |
| 335             | ESP     | WM     | 0,044 | 0,057 | 0,899 |
| 402             | ESP     | WM     | 0,149 | 0,112 | 0,739 |
| 448             | ESP     | WM     | 0,135 | 0,051 | 0,814 |
| 349             | ESP     | WM     | 0,072 | 0,067 | 0,861 |
| 773             | ESP     | WM     | 0,036 | 0,032 | 0,932 |
| 565             | ESP     | WM     | 0,039 | 0,046 | 0,915 |
| 49              | ESP     | WM     | 0,051 | 0,035 | 0,914 |
| 364             | ESP     | WM     | 0,402 | 0,062 | 0,536 |
| 272             | ESP     | WM     | 0,031 | 0,029 | 0,940 |
| 392             | ESP     | WM     | 0,247 | 0,041 | 0,712 |
| 28              | ESP     | WM     | 0,057 | 0,039 | 0,904 |
| 408             | ESP     | WM     | 0,019 | 0,041 | 0,940 |
| 411             | ESP     | WM     | 0,099 | 0,054 | 0,847 |
| 29              | ESP     | WM     | 0,104 | 0,030 | 0,866 |
| 293             | ESP     | WM     | 0,091 | 0,066 | 0,843 |
| 649             | ESP     | WM     | 0,091 | 0,369 | 0,540 |
| 343             | ESP     | WM     | 0,042 | 0,024 | 0,935 |
| 361             | ESP     | WM     | 0,064 | 0,033 | 0,903 |
| 785             | ESP     | WM     | 0,038 | 0,062 | 0,901 |
| 277             | ESP     | WM     | 0,022 | 0,211 | 0,767 |
| 13              | ESP     | WM     | 0,452 | 0,502 | 0,046 |
| 332             | ESP     | WM     | 0,069 | 0,059 | 0,872 |
| 522             | ESP     | WM     | 0,025 | 0,215 | 0,760 |
| 387             | ESP     | WM     | 0,099 | 0,105 | 0,796 |
| 413             | ESP     | WM     | 0,040 | 0,050 | 0,911 |
| 427             | ESP     | WM     | 0,100 | 0,079 | 0,821 |
| 401             | ESP     | WM     | 0,065 | 0,044 | 0,891 |
| 348             | ESP     | WM     | 0,048 | 0,032 | 0,921 |
| 798             | ESP     | WM     | 0,117 | 0,049 | 0,834 |
| 778             | ESP     | WM     | 0,026 | 0,092 | 0,882 |
| 801             | ESP     | WM     | 0,182 | 0,070 | 0,748 |
| 284             | ESP     | WM     | 0,022 | 0,042 | 0,936 |
| 740             | ESP     | WM     | 0,499 | 0,036 | 0,465 |
| 802             | ESP     | WM     | 0,038 | 0,098 | 0,864 |
| 800             | ESP     | WM     | 0,077 | 0,587 | 0,336 |
| 883             | ESP     | WM     | 0,388 | 0,538 | 0,074 |
| 871             | ESP     | WM     | 0,663 | 0,261 | 0,077 |
| 360             | ESP     | WM     | 0,059 | 0,088 | 0,853 |
| 276             | ESP     | WM     | 0,035 | 0,027 | 0,938 |
| 957             | ESP     | WM     | 0,037 | 0,061 | 0,902 |
| 864             | ESP     | WM     | 0,082 | 0,093 | 0,826 |
| 774             | ESP     | WM     | 0,034 | 0,039 | 0,926 |
| 994             | ESP     | WM     | 0,570 | 0,062 | 0,369 |
| 355             | ESP     | WM     | 0,045 | 0,036 | 0,919 |

| Register Number | ORIGIN* | REGION | K=3** |       |       |
|-----------------|---------|--------|-------|-------|-------|
|                 |         |        | A     | B     | C     |
| 822             | ESP     | WM     | 0,435 | 0,418 | 0,147 |
| 1065            | ESP     | WM     | 0,175 | 0,471 | 0,354 |
| 660             | ESP     | WM     | 0,370 | 0,588 | 0,042 |
| 1069            | ESP     | WM     | 0,554 | 0,379 | 0,068 |
| 962             | ESP     | WM     | 0,747 | 0,228 | 0,025 |
| 1073            | ESP     | WM     | 0,525 | 0,420 | 0,056 |
| 966             | ESP     | WM     | 0,923 | 0,064 | 0,013 |
| 1068            | ESP     | WM     | 0,080 | 0,185 | 0,735 |
| 1072            | ESP     | WM     | 0,055 | 0,387 | 0,558 |
| 795             | ESP     | WM     | 0,074 | 0,064 | 0,862 |
| 969             | ESP     | WM     | 0,303 | 0,590 | 0,107 |
| 631             | ESP     | WM     | 0,392 | 0,036 | 0,573 |
| 365             | ESP     | WM     | 0,032 | 0,050 | 0,918 |
| 956             | ESP     | WM     | 0,020 | 0,114 | 0,866 |
| 797             | ESP     | WM     | 0,092 | 0,048 | 0,860 |
| 1448            | ESP     | WM     | 0,130 | 0,366 | 0,504 |
| 1720            | ESP     | WM     | 0,049 | 0,031 | 0,920 |
| 1440            | ESP     | WM     | 0,146 | 0,352 | 0,502 |
| 1445            | ESP     | WM     | 0,032 | 0,857 | 0,111 |
| 1442            | ESP     | WM     | 0,084 | 0,350 | 0,566 |
| 30              | ESP     | WM     | 0,055 | 0,054 | 0,892 |
| 1920            | ESP     | WM     | 0,432 | 0,340 | 0,228 |
| 771             | ESP     | WM     | 0,136 | 0,039 | 0,825 |
| 2253            | ESP     | WM     | 0,638 | 0,117 | 0,245 |
| 2042            | ESP     | WM     | 0,740 | 0,177 | 0,083 |
| 2100            | ESP     | WM     | 0,081 | 0,119 | 0,800 |
| 2134            | ESP     | WM     | 0,064 | 0,130 | 0,806 |
| 2136            | ESP     | WM     | 0,124 | 0,053 | 0,823 |
| 2144            | ESP     | WM     | 0,197 | 0,238 | 0,565 |
| 2148            | ESP     | WM     | 0,050 | 0,037 | 0,913 |
| 2151            | ESP     | WM     | 0,564 | 0,046 | 0,390 |
| 2153            | ESP     | WM     | 0,402 | 0,099 | 0,499 |
| 2155            | ESP     | WM     | 0,131 | 0,170 | 0,699 |
| 2156            | ESP     | WM     | 0,532 | 0,154 | 0,315 |
| 2157            | ESP     | WM     | 0,680 | 0,147 | 0,173 |
| 2160            | ESP     | WM     | 0,026 | 0,629 | 0,345 |
| 2162            | ESP     | WM     | 0,026 | 0,072 | 0,902 |
| 2165            | ESP     | WM     | 0,099 | 0,019 | 0,882 |
| 2171            | ESP     | WM     | 0,165 | 0,551 | 0,284 |
| 2173            | ESP     | WM     | 0,299 | 0,504 | 0,197 |
| 2175            | ESP     | WM     | 0,179 | 0,132 | 0,689 |
| 2176            | ESP     | WM     | 0,527 | 0,033 | 0,440 |
| 2177            | ESP     | WM     | 0,154 | 0,053 | 0,794 |
| 2179            | ESP     | WM     | 0,272 | 0,470 | 0,258 |
| 2180            | ESP     | WM     | 0,126 | 0,519 | 0,355 |
| 2181            | ESP     | WM     | 0,126 | 0,615 | 0,260 |

| Register Number | ORIGIN* | REGION | K=3** |       |       |
|-----------------|---------|--------|-------|-------|-------|
|                 |         |        | A     | B     | C     |
| 2182            | ESP     | WM     | 0,227 | 0,565 | 0,208 |
| 2183            | ESP     | WM     | 0,259 | 0,484 | 0,257 |
| 2184            | ESP     | WM     | 0,408 | 0,330 | 0,262 |
| 2185            | ESP     | WM     | 0,468 | 0,231 | 0,301 |
| 2186            | ESP     | WM     | 0,065 | 0,503 | 0,433 |
| 2187            | ESP     | WM     | 0,499 | 0,043 | 0,458 |
| 2188            | ESP     | WM     | 0,244 | 0,189 | 0,567 |
| 2189            | ESP     | WM     | 0,083 | 0,606 | 0,311 |
| 2196            | ESP     | WM     | 0,114 | 0,056 | 0,830 |
| 2192            | ESP     | WM     | 0,047 | 0,594 | 0,359 |
| 2193            | ESP     | WM     | 0,168 | 0,351 | 0,482 |
| 2194            | ESP     | WM     | 0,623 | 0,274 | 0,103 |
| 2197            | ESP     | WM     | 0,297 | 0,299 | 0,404 |
| 2198            | ESP     | WM     | 0,105 | 0,511 | 0,384 |
| 2199            | ESP     | WM     | 0,093 | 0,118 | 0,789 |
| 2201            | ESP     | WM     | 0,032 | 0,044 | 0,925 |
| 2242            | ESP     | WM     | 0,222 | 0,051 | 0,727 |
| 2244            | ESP     | WM     | 0,779 | 0,207 | 0,014 |
| 2246            | ESP     | WM     | 0,309 | 0,445 | 0,246 |
| 2247            | ESP     | WM     | 0,379 | 0,368 | 0,253 |
| 2249            | ESP     | WM     | 0,762 | 0,051 | 0,187 |
| 2250            | ESP     | WM     | 0,387 | 0,440 | 0,172 |
| 2251            | ESP     | WM     | 0,396 | 0,107 | 0,498 |
| 2252            | ESP     | WM     | 0,473 | 0,023 | 0,504 |
| 2276            | ESP     | WM     | 0,047 | 0,056 | 0,897 |
| 2282            | ESP     | WM     | 0,138 | 0,068 | 0,794 |
| 2283            | ESP     | WM     | 0,496 | 0,180 | 0,324 |
| 2132            | ESP     | WM     | 0,087 | 0,039 | 0,874 |
| 2394            | ESP     | WM     | 0,021 | 0,036 | 0,943 |
| 420             | ESP     | WM     | 0,194 | 0,044 | 0,762 |
| 322             | FRA     | WM     | 0,480 | 0,108 | 0,412 |
| 70              | FRA     | WM     | 0,251 | 0,162 | 0,587 |
| 63              | FRA     | WM     | 0,555 | 0,021 | 0,424 |
| 76              | FRA     | WM     | 0,188 | 0,100 | 0,712 |
| 73              | FRA     | WM     | 0,822 | 0,078 | 0,100 |
| 67              | FRA     | WM     | 0,555 | 0,056 | 0,390 |
| 708             | FRA     | WM     | 0,100 | 0,404 | 0,496 |
| 1848            | FRA     | WM     | 0,186 | 0,428 | 0,385 |
| 1091            | FRA     | WM     | 0,425 | 0,309 | 0,265 |
| 1845            | FRA     | WM     | 0,685 | 0,069 | 0,246 |
| 1846            | FRA     | WM     | 0,788 | 0,050 | 0,162 |
| 2204            | FRA     | WM     | 0,227 | 0,475 | 0,299 |
| 2210            | FRA     | WM     | 0,045 | 0,809 | 0,146 |
| 2214            | FRA     | WM     | 0,440 | 0,157 | 0,403 |
| 2215            | FRA     | WM     | 0,147 | 0,745 | 0,109 |
| 2216            | FRA     | WM     | 0,291 | 0,242 | 0,467 |

| Register Number | ORIGIN* | REGION       | K=3**        |              |              |
|-----------------|---------|--------------|--------------|--------------|--------------|
|                 |         |              | A            | B            | C            |
| 2218            | FRA     | WM           | 0,847        | 0,068        | 0,085        |
| 2219            | FRA     | WM           | 0,122        | 0,577        | 0,301        |
| 2220            | FRA     | WM           | 0,342        | 0,527        | 0,131        |
| 2222            | FRA     | WM           | 0,525        | 0,152        | 0,323        |
| 2224            | FRA     | WM           | 0,054        | 0,281        | 0,665        |
| 2228            | FRA     | WM           | 0,268        | 0,091        | 0,641        |
| 2229            | FRA     | WM           | 0,565        | 0,355        | 0,080        |
| 2230            | FRA     | WM           | 0,143        | 0,266        | 0,591        |
| 2231            | FRA     | WM           | 0,347        | 0,309        | 0,343        |
| 2232            | FRA     | WM           | 0,245        | 0,086        | 0,669        |
| 101             | MAR     | WM           | 0,024        | 0,027        | 0,949        |
| 1932            | MAR     | WM           | 0,013        | 0,630        | 0,357        |
| 1930            | MAR     | WM           | 0,141        | 0,822        | 0,038        |
| 1944            | MAR     | WM           | 0,092        | 0,063        | 0,845        |
| 1927            | MAR     | WM           | 0,015        | 0,513        | 0,472        |
| 1931            | MAR     | WM           | 0,012        | 0,651        | 0,337        |
| 1937            | MAR     | WM           | 0,087        | 0,065        | 0,848        |
| 1414            | MEX     | WM           | 0,194        | 0,160        | 0,647        |
| 1130            | MEX     | WM           | 0,337        | 0,064        | 0,599        |
| 1134            | MEX     | WM           | 0,035        | 0,377        | 0,588        |
| 2047            | PER     | WM           | 0,440        | 0,206        | 0,354        |
| 124             | PRT     | WM           | 0,107        | 0,036        | 0,857        |
| 125             | PRT     | WM           | 0,033        | 0,050        | 0,917        |
| 130             | PRT     | WM           | 0,038        | 0,050        | 0,912        |
| 128             | PRT     | WM           | 0,020        | 0,208        | 0,772        |
| 887             | PRT     | WM           | 0,078        | 0,377        | 0,545        |
| 707             | USA     | WM           | 0,093        | 0,056        | 0,851        |
| <b>Mean</b>     |         | <b>EM</b>    | <b>0,751</b> | <b>0,077</b> | <b>0,172</b> |
|                 |         | <b>CM</b>    | <b>0,299</b> | <b>0,448</b> | <b>0,253</b> |
|                 |         | <b>WM</b>    | <b>0,214</b> | <b>0,197</b> | <b>0,588</b> |
|                 |         | <b>Total</b> | <b>0,299</b> | <b>0,448</b> | <b>0,253</b> |

\*For same genotypes identified in different countries, a representative registration code and country of origin were chosen according to WOGBC historical information

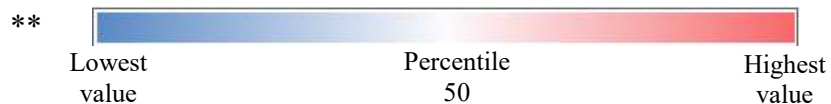

Supplement: s1 [file s1]
