# Supplementary material for: Utility of EST-SNP Markers for Improving Management and Use of Olive Genetic Resources: A Case Study at the Worldwide Olive Germplasm Bank of Córdoba
Source: MDPI journal article supplement (doi:10.3390/plants11070921), 2022-03-29
Supplement: s1 [file s1]

**Supplemental Table S4:** Cultivars included in each homonymy group considered in the present study. General denomination of each homonymy group, possible meaning of homonyms' denomination and related bibliographic references are also indicated.

| Homonymy Group | Accessions/cultivars included in each homonymy group | Origin* | General denomination of homonymy groups           | General meaning of homonymy's denomination | Bibliographic reference    |
|----------------|------------------------------------------------------|---------|---------------------------------------------------|--------------------------------------------|----------------------------|
| 1              | Abade Helo-1623                                      | SYR     | Abadi / e / Abbadi / Abbadi Abou Gabra            | Black fruit                                | [3], [4], [6], [24], [102] |
|                | Abade Mour                                           | SYR     |                                                   |                                            |                            |
|                | Abadi Rassasi                                        | SYR     |                                                   |                                            |                            |
|                | Abbadi                                               | SYR     |                                                   |                                            |                            |
|                | Abbadi Shalal                                        | SYR     |                                                   |                                            |                            |
|                | Abbadi Abou Gabra-1033                               | SYR     |                                                   |                                            |                            |
|                | Abbadi Abou Gabra-842                                | SYR     |                                                   |                                            |                            |
| 2              | Abo Akfa                                             | SYR     | Abo / Abou                                        | Fruits having a certain trait or shape     | [3], [6], [24], [102]      |
|                | Abo Anaked                                           | SYR     |                                                   |                                            |                            |
|                | Abou Satl Mohazam                                    | SYR     |                                                   |                                            |                            |
|                | Abou Kanani                                          | SYR     |                                                   |                                            |                            |
| 3              | Abo Shawke                                           | SYR     | Abo Shawke / Abou Chawkeh / Abou Choki / Bouchouk | Fruits or stones with a thorn              | [3], [6], [43]             |
|                | Abou Chawkeh                                         | LBN     |                                                   |                                            |                            |
|                | Abou Choki-1115                                      | SYR     |                                                   |                                            |                            |
|                | Abou Choki-1126                                      | SYR     |                                                   |                                            |                            |
|                | Bouchouk Lafayette                                   | DZA     |                                                   |                                            |                            |
|                | Bouchouk Laghlid                                     | MAR     |                                                   |                                            |                            |
| 4              | Acebuche                                             | ESP     | Acebuche / Acebuchera / Azeboudi / Zeboudj        | Wild olive                                 |                            |
|                | Acebuche de Caravaca-800                             | ESP     |                                                   |                                            |                            |
|                | Acebuchera                                           | ESP     |                                                   |                                            |                            |
|                | Azeboudi de Kirane-1549                              | DZA     |                                                   |                                            |                            |
|                | Azeboudi de Kirane-1659                              | DZA     |                                                   |                                            |                            |
|                | Zeboudj Boudoudan                                    | DZA     |                                                   |                                            |                            |

| Homonymy Group | Accessions/cultivars included in each homonymy group | Origin* | General denomination of homonymy groups          | General meaning of homonymy's denomination | Bibliographic reference   |
|----------------|------------------------------------------------------|---------|--------------------------------------------------|--------------------------------------------|---------------------------|
| 5              | Aceitunero-2022                                      | ESP     | Aceitunero / Zeitoun / Zeitun / Zeitini / Zeytin | Olive / olive farmer                       | [46]                      |
|                | Aceitunero-2249                                      | ESP     |                                                  |                                            |                           |
|                | Zeitoun Boubezzoula                                  | TUN     |                                                  |                                            |                           |
|                | Zeitun lkhl                                          | MAR     |                                                  |                                            |                           |
|                | Zitoune DK                                           | MAR     |                                                  |                                            |                           |
|                | Girit Zeytini                                        | TUR     |                                                  |                                            |                           |
|                | Ak Zeytin                                            | TUR     |                                                  |                                            |                           |
| 6              | Aggezi                                               | EGY     | Aggezi / Aggizi                                  | Old or sacred                              | [3]                       |
|                | Aggizi Akse                                          | EGY     |                                                  |                                            |                           |
|                | Aggizi Oshime                                        | EGY     |                                                  |                                            |                           |
|                | Aggizi Shame                                         | EGY     |                                                  |                                            |                           |
| 7              | Aimel                                                | DZA     | Aimel                                            | From Aimel (toponymy)                      |                           |
|                | Aimel (Setif)                                        | DZA     |                                                  |                                            |                           |
| 8              | Alameño Blanco                                       | ESP     | Alameño                                          | Erect like an aspen tree                   | [3], [4], [6], [28], [42] |
|                | Alameño de Cabra                                     | ESP     |                                                  |                                            |                           |
|                | Alameño de Marchena                                  | ESP     |                                                  |                                            |                           |
|                | Alameño de Montilla                                  | ESP     |                                                  |                                            |                           |
| 9              | Aloreña de Iznalloz                                  | ESP     | Aloreña                                          | From Álora (toponymy)                      |                           |
|                | Aloreña                                              | ESP     |                                                  |                                            |                           |
|                | Aloreña-829                                          | ARG     |                                                  |                                            |                           |
| 10             | Arabi Altafeleh                                      | JOR     | Arabi / Arabi Altafila                           | Arabic                                     |                           |
|                | Arabi Altafila                                       | JOR     |                                                  |                                            |                           |
| 11             | Ascolana Huasco                                      | CHL     | Ascolana                                         | From Ascoli (toponymy)                     |                           |
|                | Ascolana Tenera                                      | ITA     |                                                  |                                            |                           |
| 12             | Ayrouni                                              | LBN     | Ayrouni                                          | Very small fruits                          |                           |
|                | Ayrouni Amioun                                       | LBN     |                                                  |                                            |                           |
|                | Ayrouni-1599                                         | SYR     |                                                  |                                            |                           |
|                | Ayrouni-2077                                         | LBN     |                                                  |                                            |                           |

| Homonymy Group | Accessions/cultivars included in each homonymy group                                                                                                  | Origin*                                                     | General denomination of homonymy groups                   | General meaning of homonymy's denomination | Bibliographic reference |
|----------------|-------------------------------------------------------------------------------------------------------------------------------------------------------|-------------------------------------------------------------|-----------------------------------------------------------|--------------------------------------------|-------------------------|
| 13             | Baid El Hamam<br>Bidh Hmam<br>Bed al Igel                                                                                                             | EGY<br>TUN<br>SYR                                           | Baid / Bidh / Bed                                         | Big like an egg                            |                         |
| 14             | Baladi (Ain)<br>Baladi<br>Baladi (Fekhe)<br>Baladi Ijd Ibrine<br>Baladi Mabroum<br>Baladi Roumani<br>Baladi Tawil<br>Balady<br>Beldi                  | LBN<br>LBN<br>LBN<br>LBN<br>LBN<br>LBN<br>LBN<br>EGY<br>TUN | Baladi / Balady / Beldi                                   | Local / from the country                   | [33]                    |
| 15             | Baladi Hermel-2072<br>Baladi Hermel-2074                                                                                                              | LBN<br>LBN                                                  | Baladi / Baladi Hermel                                    | Local from Hermel (toponymy)               |                         |
| 16             | Baladi Remadieh-1769<br>Baladi Remadieh-2082                                                                                                          | LBN<br>LBN                                                  | Baladi / Baladi Remadieh                                  | Local from Remadieh (toponymy)             |                         |
| 17             | Balhi Sig<br>Balah                                                                                                                                    | TUN<br>LBN                                                  | Balah / Balhi                                             | Date fruit shape                           |                         |
| 18             | Barouni-1661<br>Barouni-1823                                                                                                                          | TUN<br>TUN                                                  | Barouni                                                   | High-class                                 |                         |
| 19             | Barri<br>Berri Meslal 3                                                                                                                               | SYR<br>MAR                                                  | Barri / Berri                                             | Wild olive                                 |                         |
| 20             | Bianchera<br>Biancolilla<br>Biancolilla-1814<br>Blanqueta<br>Blanqueta Gorda<br>Blanquette de Gastu<br>Blanquette de Guelma<br>Branquita de Elvas Red | ITA<br>ITA<br>ARG<br>ESP<br>ESP<br>DZA<br>DZA<br>PRT        | Bianchera / Biancolilla / Blanquet<br>a / tte / Branquita | White olive                                | [92]                    |

| Homonymy Group | Accessions/cultivars included in each homonymy group | Origin* | General denomination of homonymy groups                          | General meaning of homonymy's denomination | Bibliographic reference   |
|----------------|------------------------------------------------------|---------|------------------------------------------------------------------|--------------------------------------------|---------------------------|
| 21             | Bjelica                                              | HRV     | Bjelica                                                          | White olive                                | [103]                     |
|                | Istarska Bjelica                                     | HRV     |                                                                  |                                            |                           |
|                | Istrka Belica                                        | SVN     |                                                                  |                                            |                           |
|                | Plementa Bjelica                                     | HRV     |                                                                  |                                            |                           |
| 22             | Cañivano Blanco                                      | ESP     | Cañivano                                                         | Wood (black or white)                      | [3], [4], [6], [28], [42] |
|                | Cañivano Negro                                       | ESP     |                                                                  |                                            |                           |
|                | Cañivano Negro-55                                    | ESP     |                                                                  |                                            |                           |
| 23             | Cariasina                                            | ITA     | Cariasina / Cerasuola / Cerezuela / Cerisier / Ciliegino / Kiraz | Cherry fruit shape or colour               |                           |
|                | Cerasuola                                            | ITA     |                                                                  |                                            |                           |
|                | Cerezuela                                            | ESP     |                                                                  |                                            |                           |
|                | Cerisier                                             | FRA     |                                                                  |                                            |                           |
|                | Ciliegino                                            | ITA     |                                                                  |                                            |                           |
|                | Kiraz                                                | TUR     |                                                                  |                                            |                           |
| 24             | Carrasco                                             | ESP     | Carrasco / Carrasqueño (a) / Carrasqueta / Carrasquillo          | Robust leaves like holm oak and oak        | [3], [4], [6], [42]       |
|                | Carrasqueña de Cañada                                | ESP     |                                                                  |                                            |                           |
|                | Carrasqueña Huasco                                   | CHL     |                                                                  |                                            |                           |
|                | Carrasqueño de Alburquerque                          | ESP     |                                                                  |                                            |                           |
|                | Carrasqueño de Alcaudete                             | ESP     |                                                                  |                                            |                           |
|                | Carrasqueño de Elvas                                 | PRT     |                                                                  |                                            |                           |
|                | Carrasqueño de Jumilla                               | ESP     |                                                                  |                                            |                           |
|                | Carrasqueño de la Sierra                             | ESP     |                                                                  |                                            |                           |
|                | Carrasqueño de Porcuna                               | ESP     |                                                                  |                                            |                           |
|                | Carrasquillo                                         | ESP     |                                                                  |                                            |                           |
|                | Carrasqueta De Ayora                                 | ESP     |                                                                  |                                            |                           |
| 25             | Cayet Noir                                           | FRA     | Cayet                                                            | Mottled fruits                             |                           |
|                | Cayet Roux                                           | FRA     |                                                                  |                                            |                           |

| Homonymy Group | Accessions/cultivars included in each homonymy group | Origin* | General denomination of homonymy groups | General meaning of homonymy's denomination | Bibliographic reference |
|----------------|------------------------------------------------------|---------|-----------------------------------------|--------------------------------------------|-------------------------|
| 26             | Hamza celebi                                         | TUR     | Celebi                                  | High status / big size of the fruit        | [21]                    |
|                | Kan Celebi                                           | TUR     |                                         |                                            |                         |
|                | Tesbih Celebi                                        | TUR     |                                         |                                            |                         |
|                | Yun Celebi                                           | TUR     |                                         |                                            |                         |
|                | Celebi (Iznik)                                       | TUR     |                                         |                                            |                         |
|                | Celebi (Silifke)                                     | TUR     |                                         |                                            |                         |
|                | Hirhali Celebi                                       | TUR     |                                         |                                            |                         |
| 27             | Cerruda de Liesa                                     | ESP     | Cerruda                                 | Closed and densed branches                 | [95], [101]             |
|                | Cerruda de Olvena                                    | ESP     |                                         |                                            |                         |
| 28             | Chemlal                                              | DZA     | Chemlal / i                             | Small fruits                               | [41], [92], [93]        |
|                | Chemlal de Kabilye                                   | DZA     |                                         |                                            |                         |
|                | Chemlali Balhi                                       | TUN     |                                         |                                            |                         |
|                | Chemlali Bent Louzir                                 | TUN     |                                         |                                            |                         |
|                | Chemlali Ghraiba                                     | TUN     |                                         |                                            |                         |
|                | Chemlali Mahares                                     | TUN     |                                         |                                            |                         |
|                | Chemlali Meliane                                     | TUN     |                                         |                                            |                         |
|                | Chemlali Nord                                        | TUN     |                                         |                                            |                         |
|                | Chemlali Ouled Msallem                               | TUN     |                                         |                                            |                         |
|                | Chemlali Sfax                                        | TUN     |                                         |                                            |                         |
|                | Chemlali Sig                                         | TUN     |                                         |                                            |                         |
|                | Chemlali Tataouine                                   | TUN     |                                         |                                            |                         |
|                | Chemlali Zarzis                                      | TUN     |                                         |                                            |                         |
| 29             | Chemlali Ontha Tataouine                             | TUN     | Anthas / Onthas                         | Female / fertile, high productive tree     | [52], [92], [93]        |
|                | Chaïbi Antha                                         | TUN     |                                         |                                            |                         |
| 30             | Chorreao de Montefrío                                | ESP     | Chorreao / Chorrúo                      | Weeping tree (branches)                    | [42]                    |
|                | Chorrúo                                              | ESP     |                                         |                                            |                         |
|                | Chorrúo de Castro del Río-361                        | ESP     |                                         |                                            |                         |

| Homonymy Group | Accessions/cultivars included in each homonymy group                                                              | Origin*                         | General denomination of homonymy groups | General meaning of homonymy's denomination | Bibliographic reference   |
|----------------|-------------------------------------------------------------------------------------------------------------------|---------------------------------|-----------------------------------------|--------------------------------------------|---------------------------|
| 31             | Cirujal<br>Cirujal-2027<br>Cirujal-2153                                                                           | ESP<br>ESP<br>ESP               | Cirujal                                 | Plum fruit / tree shape                    |                           |
| 32             | Cordobés de Arroyo de la Luz<br>Cordobés de la Aliseda<br>Cordovil de Castelo Branco<br>Cordovil de Serpa         | ESP<br>ESP<br>PRT<br>PRT        | Cordobés / Cordovil                     | From Córdoba (toponymy)                    | [3], [4], [6], [24], [42] |
| 33             | Cornicabra<br>Cornicabra de Jerez Caballeros<br>Cornicabra de Mérida<br>Cornicabra Murciana<br>Cornezuelo de Jaén | ESP<br>ESP<br>ESP<br>ESP<br>ESP | Cornicabra / Cornezuelo                 | Long curved fruits (like horns)            | [3], [4], [6], [24], [42] |
| 34             | Corsicana da Mensa<br>Corsicana da Olio                                                                           | ITA<br>ITA                      | Corsicana                               | From Corse Island (toponymy)               | [1], [83]                 |
| 35             | Crnica<br>Crnjaka                                                                                                 | HRV<br>MNE                      | Crnica / Crnjaka                        | Black fruits                               | [103]                     |
| 36             | Cuquello de la Jana<br>Cuquello-1                                                                                 | ESP<br>ESP                      | Cuquello                                | Bird (sweet for birds)                     | [101]                     |
| 37             | Dan<br>Dan-136                                                                                                    | SYR<br>SYR                      | Dan                                     | Jewel / gem                                |                           |
| 38             | Datilera de Caudiel<br>Datilero                                                                                   | ESP<br>ESP                      | Datilero / a                            | Date fruit shape                           |                           |
| 39             | Desconocida Vx1<br>Desconocida-1481<br>Desconocido-2021<br>Desconocido-2026                                       | ESP<br>ESP<br>ESP<br>ESP        | Desconocida                             | Unknown                                    |                           |
| 40             | Dhokkar Nafti<br>Dhokkar Tataouine<br>Dokkar                                                                      | TUN<br>TUN<br>TUN               | Dhokkar / Dokkar                        | Male tree (pollinator)                     | [41]                      |

| Homonymy Group | Accessions/cultivars included in each homonymy group                                                         | Origin*                         | General denomination of homonymy groups  | General meaning of homonymy's denomination | Bibliographic reference |
|----------------|--------------------------------------------------------------------------------------------------------------|---------------------------------|------------------------------------------|--------------------------------------------|-------------------------|
| 41             | Djabali Kini-1572<br>Djabali Kini-2057<br>Jabali                                                             | SYR<br>SYR<br>SYR               | Djabali                                  | Mountainous                                |                         |
| 42             | Doebli<br>Doebli-1596                                                                                        | SYR<br>SYR                      | Doebli                                   | Big and round                              |                         |
| 43             | Dolce<br>Dolce Agogia<br>Dolça<br>Dulzal<br>Dulzal de Carmona                                                | EGY<br>ITA<br>ESP<br>ESP<br>ESP | Dolce / Dolça / Dulzal                   | Sweet                                      | [3], [4], [42]          |
| 44             | Dopia Pierias<br>Dopia Verias                                                                                | GRC<br>GRC                      | Dopia                                    | Local / from the country                   | [44]                    |
| 45             | Egriburum (Nizip)<br>Egriburum (Tatayn)                                                                      | TUR<br>TUR                      | Egriburum                                | Crooked nose                               | [21]                    |
| 46             | Escarabajillo<br>Escarabajo<br>Escarabajuelo de Atarfe<br>Escarabajuelo de Posadas<br>Escarabajuelo de Ubeda | ESP<br>ESP<br>ESP<br>ESP<br>ESP | Escarabaj(o) / (illo) /<br>Escarabajuelo | Little beetle / beetle                     | [3], [4], [6]           |
| 47             | Esek Zeytini (Odemis)<br>Esek Zeytini (Tekirdag)                                                             | TUR<br>TUR                      | Eşek zeytini / Zeytini                   | Donkey i.e. big olive fruit                | [21]                    |
| 48             | Gerboua<br>Gerboui<br>Gerboui-1551<br>Gerboui-1672<br>Gerboui-1862                                           | TUN<br>TUN<br>TUN<br>TUN<br>TUN | Gerboui / Gerboua                        | Family name in Tunisia (well known)        |                         |

| Homonymy Group | Accessions/cultivars included in each homonymy group | Origin* | General denomination of homonymy groups                     | General meaning of homonymy's denomination | Bibliographic reference          |
|----------------|------------------------------------------------------|---------|-------------------------------------------------------------|--------------------------------------------|----------------------------------|
| 49             | Gorda Limoncillo                                     | ESP     | Gorda / Gordal / (Grossal / Grossane / Grossa) / Grossolana | Large / big / huge fruit size              | [3], [4], [6], [24], [42], [101] |
|                | Gordal de Archidona                                  | ESP     |                                                             |                                            |                                  |
|                | Gordal de Écija                                      | ESP     |                                                             |                                            |                                  |
|                | Gordal de Granada                                    | ESP     |                                                             |                                            |                                  |
|                | Gordal de Hellín                                     | ESP     |                                                             |                                            |                                  |
|                | Gordal de Somontano                                  | ESP     |                                                             |                                            |                                  |
|                | Gordal de Vélez Rubio                                | ESP     |                                                             |                                            |                                  |
|                | Gordal Sevillana                                     | ESP     |                                                             |                                            |                                  |
|                | Gordal Valle las Palmeras                            | MEX     |                                                             |                                            |                                  |
|                | Grosal de Albocácer                                  | ESP     |                                                             |                                            |                                  |
|                | Grosal de Cieza                                      | ESP     |                                                             |                                            |                                  |
|                | Grosal Vimbodí                                       | ESP     |                                                             |                                            |                                  |
|                | Grossa di Spagna                                     | ITA     |                                                             |                                            |                                  |
|                | Grossanne                                            | FRA     |                                                             |                                            |                                  |
|                | Grossanne-67                                         | FRA     |                                                             |                                            |                                  |
|                | Grossolana                                           | ITA     |                                                             |                                            |                                  |
| 50             | Gremignolo                                           | ITA     | Gremignolo                                                  |                                            | [3]                              |
|                | Gremignolo di Bolgheri                               | ITA     |                                                             |                                            |                                  |
| 51             | Habichuelero de Baena                                | ESP     | Habichuelero                                                | Small bean                                 | [3], [6], [42]                   |
|                | Habichuelero de Grazalema                            | ESP     |                                                             |                                            |                                  |
| 52             | Halhali (Hatay)                                      | TUR     | Halhali / Khalkhali                                         | Pending like anklets / or abundant         | [46], [102]                      |
|                | Halhali Celebi                                       | TUR     |                                                             |                                            |                                  |
|                | Khalkhali                                            | SYR     |                                                             |                                            |                                  |
|                | Khalkhali-1107                                       | SYR     |                                                             |                                            |                                  |
|                | Khalkhali-1595                                       | SYR     |                                                             |                                            |                                  |
|                | Khalkhali-789                                        | SYR     |                                                             |                                            |                                  |
| 53             | Hamra                                                | DZA     | Hamra / Hamrani                                             | Red colour                                 |                                  |
|                | Hamrani                                              | MAR     |                                                             |                                            |                                  |



| <b>Homonymy Group</b> | <b>Accessions/cultivars included in each homonymy group</b> | <b>Origin*</b>           | <b>General denomination of homonymy groups</b> | <b>General meaning of homonymy's denomination</b> | <b>Bibliographic reference</b> |
|-----------------------|-------------------------------------------------------------|--------------------------|------------------------------------------------|---------------------------------------------------|--------------------------------|
| 54                    | Hembalassi<br>Hemblasi                                      | SYR<br>SYR               | Hembalassi / Hemblasi                          | Myrtle / myrtle fruit shape                       |                                |
| 55                    | Hojiblanca<br>Hojiblanca de Navarrés                        | ESP<br>ESP               | Hojiblanca                                     | White leaf                                        | [42], [101]                    |
| 56                    | Hurma Kaba<br>Hurma Karaca                                  | TUR<br>TUR               | Hurma                                          | Date fruit shape                                  | [46], [104]                    |
| 57                    | Imperial<br>Imperial de Jaén                                | ESP<br>ESP               | Imperial                                       | Imperial / magnificent                            | [4]                            |
| 58                    | Injassi Gafsa<br>Injassi Hchichina                          | TUN<br>TUN               | Injassi                                        | Pear fruit shape                                  | [41]                           |
| 59                    | Jaén-1<br>Jaén-2                                            | ESP<br>ESP               | Jaén                                           | From Jaén (toponymy)                              |                                |
| 60                    | Janude-1<br>Janude-2                                        | SYR<br>SYR               | Janude                                         |                                                   |                                |
| 61                    | Jemri Bouchouka<br>Jemri Dhokkar-1732<br>Jemri Dhokkar-1907 | TUN<br>TUN<br>TUN        | Jermri / Jemri Dhokkar                         | Red as a burning coal                             | [41]                           |
| 62                    | Jlot<br>Jlot-1965<br>Jlot-841<br>Jlot-976                   | SYR<br>LBN<br>SYR<br>SYR | Jlot                                           | Big                                               | [3], [6]                       |
| 63                    | Kalb-el-tair<br>Kelb et Ter-144<br>Kelb et Ter-145          | LBN<br>SYR<br>SYR        | Kalb / Kelb / et tair / ter                    | Heart of the bird                                 | [4]                            |
| 64                    | Kallmet<br>Kallmet Kokerrvogel                              | ALB<br>ALB               | Kallmet                                        | From Kallmet (toponymy)                           | [105], [106]                   |

| Homonymy Group | Accessions/cultivars included in each homonymy group              | Origin*                  | General denomination of homonymy groups | General meaning of homonymy's denomination | Bibliographic reference    |
|----------------|-------------------------------------------------------------------|--------------------------|-----------------------------------------|--------------------------------------------|----------------------------|
| 65             | Karamani<br>Karamani-1564<br>Karamani-2326                        | SYR<br>SYR<br>TUR        | Karamani                                | Generous                                   |                            |
| 66             | Kfari Beladi<br>Kfari Romi<br>Kfarzeta                            | JOR<br>JOR<br>SYR        | Kfar(i)                                 | Oily                                       |                            |
| 67             | Klon-14-1081<br>Klon-14-1812                                      | ALB<br>ALB               | Klon                                    | Clonal                                     | [18]                       |
| 68             | Kokerrmadh Elbasani<br>Kokerrmadhi i Beratit                      | ALB<br>ALB               | Kokerrmadh                              | Big / large fruit                          | [105], [106]               |
| 69             | Leccio del Corno<br>Leccio Maremmano<br>Leccione                  | ITA<br>ITA<br>ITA        | Leccio / Leccione                       | Oak (little or big oak)                    | [3]                        |
| 70             | Lechín de Granada<br>Lechín de Sevilla                            | ESP<br>ESP               | Lechín                                  | White flesh olive fruits                   | [3], [6], [24], [28], [42] |
| 71             | Limoncillo<br>Llimonenca<br>Pico Limón<br>Pico Limón de Grazalema | ESP<br>ESP<br>ESP<br>ESP | Limoncillo / Llimonenca / Pico<br>Limón | Lemon fruit shape / nipple like lemon      | [6], [3]                   |
| 72             | Llorón de Atarfe<br>Llorón de Iznalloz<br>Llorón de Ronda         | ESP<br>ESP<br>ESP        | Llorón                                  | Weeping tree (branches)                    | [3], [6], [42]             |
| 73             | Macho de Jaén<br>Machorron<br>Olivo Macho de Santisteban Pto      | ESP<br>ESP<br>ESP        | Macho / Machorron / Olivo<br>Macho      | Male olive tree (pollinator)               |                            |
| 74             | Mahati-1010<br>Mahati-1581<br>Mahati-846                          | SYR<br>SYR<br>SYR        | Mahati                                  | Big black fruits (like the eyes of a cow)  | [3], [6], [102]            |

| Homonymy Group | Accessions/cultivars included in each homonymy group | Origin* | General denomination of homonymy groups  | General meaning of homonymy's denomination | Bibliographic reference               |
|----------------|------------------------------------------------------|---------|------------------------------------------|--------------------------------------------|---------------------------------------|
| 75             | Majhol-1059                                          | SYR     | Majhol                                   | Unknown                                    | [3], [4], [6], [24], [102]            |
|                | Majhol-1063                                          | SYR     |                                          |                                            |                                       |
|                | Majhol-1122                                          | SYR     |                                          |                                            |                                       |
|                | Majhol-152                                           | SYR     |                                          |                                            |                                       |
| 76             | Manzanil de Piedra Buena-489                         | ESP     | Manzanil / Manzanilla / o / Manzanillera | Apple fruit shape                          | [3], [4], [6], [17], [24], [28], [42] |
|                | Manzanilla Aceitera                                  | CHL     |                                          |                                            |                                       |
|                | Manzanilla Cacereña                                  | ESP     |                                          |                                            |                                       |
|                | Manzanilla Chilena                                   | CHL     |                                          |                                            |                                       |
|                | Manzanilla de Abla                                   | ESP     |                                          |                                            |                                       |
|                | Manzanilla de Agua                                   | ESP     |                                          |                                            |                                       |
|                | Manzanilla de Almería                                | ESP     |                                          |                                            |                                       |
|                | Manzanilla de Ayora                                  | ESP     |                                          |                                            |                                       |
|                | Manzanilla de Caudiel                                | ESP     |                                          |                                            |                                       |
|                | Manzanilla de Hellín                                 | ESP     |                                          |                                            |                                       |
|                | Manzanilla de Jaén                                   | ESP     |                                          |                                            |                                       |
|                | Manzanilla de Montefrío                              | ESP     |                                          |                                            |                                       |
|                | Manzanilla de Requena                                | ESP     |                                          |                                            |                                       |
|                | Manzanilla de San Vicente                            | MEX     |                                          |                                            |                                       |
|                | Manzanilla de Sevilla                                | ESP     |                                          |                                            |                                       |
|                | Manzanilla de Tortosa                                | ESP     |                                          |                                            |                                       |
|                | Manzanilla del Centro                                | ESP     |                                          |                                            |                                       |
|                | Manzanilla del Piquito                               | ESP     |                                          |                                            |                                       |
|                | Manzanilla Picua                                     | ESP     |                                          |                                            |                                       |
|                | Manzanilla Prieta                                    | ESP     |                                          |                                            |                                       |
|                | Manzanillera de Huércal Overa                        | ESP     |                                          |                                            |                                       |
|                | Manzanillo Cordobés de Cabra                         | ESP     |                                          |                                            |                                       |
| 77             | Marsaline                                            | TUN     | Marsaline                                |                                            | [41]                                  |
|                | Marsaline-1509                                       | TUN     |                                          |                                            |                                       |
|                | Marsaline-1684                                       | TUN     |                                          |                                            |                                       |

| <b>Homonymy Group</b> | <b>Accessions/cultivars included in each homonymy group</b>      | <b>Origin*</b>           | <b>General denomination of homonymy groups</b> | <b>General meaning of homonymy's denomination</b>                  | <b>Bibliographic reference</b> |
|-----------------------|------------------------------------------------------------------|--------------------------|------------------------------------------------|--------------------------------------------------------------------|--------------------------------|
| 78                    | Mawi<br>Mawi Stanboli                                            | SYR<br>SYR               | Mawi                                           | High vigor                                                         |                                |
| 79                    | Meski<br>Meski Zarzis                                            | TUN<br>TUN               | Meski                                          | Perfumed / scented                                                 | [93]                           |
| 80                    | Mignolo<br>Mignolo Cerretano                                     | ITA<br>ITA               | Mignolo                                        | Small fruit / the name of the inflorescence of the olive (mignola) | [3]                            |
| 81                    | Misión de San Vicente<br>Mission Moojeski<br>Mission Nieland     | MEX<br>USA<br>USA        | Misión / Mission                               | Mission (religious)                                                | [3], [6]                       |
| 82                    | Mollar Basto<br>Mollar de Cieza                                  | ESP<br>ESP               | Mollar                                         | Soft pulp of the fruit                                             | [3], [4]                       |
| 83                    | Moresca<br>Morisca<br>Morisca de Mancor                          | ITA<br>ESP<br>ESP        | Moresca / Morisca                              | Dark or black fruit                                                | [3], [4], [6], [42]            |
| 84                    | Morona<br>Morona de Castellon                                    | ESP<br>ESP               | Morona                                         |                                                                    | [42], [101]                    |
| 85                    | Morruda de Salinas<br>Morruda de Segorbe<br>Morrut<br>Morrut-607 | ESP<br>ESP<br>ESP<br>ESP | Morruda / Morrut                               | Beak shape                                                         | [101], [107]                   |
| 86                    | Nabali<br>Nabali Baladi<br>Nabali Muhasan                        | ISR<br>JOR<br>JOR        | Nabali                                         | Local from Beit Nabala (toponymy) / arrow shaped                   |                                |
| 87                    | Neb Djemel<br>Neb Tataouine                                      | DZA<br>TUN               | Neb                                            | Tooth / fang of the camel                                          | [41]                           |

| Homonymy Group | Accessions/cultivars included in each homonymy group | Origin* | General denomination of homonymy groups     | General meaning of homonymy's denomination               | Bibliographic reference |
|----------------|------------------------------------------------------|---------|---------------------------------------------|----------------------------------------------------------|-------------------------|
| 88             | Negral de Bierge                                     | ESP     | Negral / Negrillo / Negro / Nera / Noirette | Black fruits / early ripening                            | [29], [42]              |
|                | Negral de Sabinán                                    | ESP     |                                             |                                                          |                         |
|                | Negrillo de Arjona                                   | ESP     |                                             |                                                          |                         |
|                | Negrillo de Estepa                                   | ESP     |                                             |                                                          |                         |
|                | Negrillo de Iznalloz                                 | ESP     |                                             |                                                          |                         |
|                | Negrillo de la Carlota                               | ESP     |                                             |                                                          |                         |
|                | Negrillo Redondo                                     | ESP     |                                             |                                                          |                         |
|                | Negro del Carpio                                     | ESP     |                                             |                                                          |                         |
|                | Negro de Aguilar                                     | ESP     |                                             |                                                          |                         |
|                | Nera di Gonnos                                       | ITA     |                                             |                                                          |                         |
|                | Nera di Oliena                                       | ITA     |                                             |                                                          |                         |
|                | Noirette de l'Herault                                | FRA     |                                             |                                                          |                         |
| 89             | Nerba                                                | ITA     | Nerba                                       | Suitable for whipping or shaking (tree)                  |                         |
|                | Nerba Catanese                                       | ITA     |                                             |                                                          |                         |
| 90             | Nevadillo de San Vicente                             | MEX     | Nevadillo / Nevado                          | Snowy / white colour (dust) of the fruit and / or leaves | [3], [4], [42]          |
|                | Nevadillo de Santisteban Pto                         | ESP     |                                             |                                                          |                         |
|                | Nevadillo Valle las Palmeras                         | MEX     |                                             |                                                          |                         |
|                | Nevadillo Blanco de Jaén                             | ESP     |                                             |                                                          |                         |
|                | Nevadillo Blanco de Lucena                           | ESP     |                                             |                                                          |                         |
|                | Nevadillo Blanco de Osuna                            | ESP     |                                             |                                                          |                         |
|                | Nevadillo Negro de Jaén                              | ESP     |                                             |                                                          |                         |
|                | Nevadillo Negro-2282                                 | ESP     |                                             |                                                          |                         |
|                | Nevado Basto                                         | ESP     |                                             |                                                          |                         |
|                | Nevado Basto de Zuheros                              | ESP     |                                             |                                                          |                         |
|                | Nevado Rizado                                        | ESP     |                                             |                                                          |                         |
|                | Nevado Azul                                          | ESP     |                                             |                                                          |                         |
| 91             | Nocellara del Belice                                 | ITA     | Nocellara / Nociara                         | Walnut                                                   | [29]                    |
|                | Nocellara Messinese                                  | ITA     |                                             |                                                          |                         |
|                | Nociara                                              | ITA     |                                             |                                                          |                         |
| 92             | Ocal de Alburquerque                                 | ESP     | Ocal                                        | Hollow fruit (sweet and delicate)                        | [4], [6]                |
|                | Ocal-25                                              | ESP     |                                             |                                                          |                         |
|                | Ocal                                                 | ESP     |                                             |                                                          |                         |

| Homonymy Group | Accessions/cultivars included in each homonymy group                                                                                                                                                                                                                                                   | Origin*                                                                                 | General denomination of homonymy groups | General meaning of homonymy's denomination        | Bibliographic reference |
|----------------|--------------------------------------------------------------------------------------------------------------------------------------------------------------------------------------------------------------------------------------------------------------------------------------------------------|-----------------------------------------------------------------------------------------|-----------------------------------------|---------------------------------------------------|-------------------------|
| 93             | Ogliarola del Bradano<br>Ogliarola del Vulture                                                                                                                                                                                                                                                         | ITA<br>ITA                                                                              | Ogliarola                               | Oil / oily                                        | [3], [29]               |
| 94             | Olivastra di Populonia<br>Olivastra Seggianese                                                                                                                                                                                                                                                         | ITA<br>ITA                                                                              | Olivastra                               | Wild olive                                        | [3], [29]               |
| 95             | Olivo da Mensa<br>Olivo de Aguamarga<br>Olivo de Galicia<br>Olivo de Mancha Real<br>Olivo de Maura<br>Olivo de Nueva Carteya<br>Olivo del Mulino<br>Olivo di Casavecchia<br>Olivo di Castiglione<br>Olivo di Mandanici<br>Olivo di San Lorenzo<br>Olivos de Cotillas<br>Olivos de El Barranco del Lobo | ITA<br>ESP<br>ESP<br>ESP<br>ESP<br>ESP<br>ITA<br>ITA<br>ITA<br>ITA<br>ITA<br>ESP<br>ESP | Olivo                                   | Olive                                             | [3], [29], [91]         |
| 96             | Oueslati T-1919<br>Ouslati                                                                                                                                                                                                                                                                             | TUN<br>TUN                                                                              | Ouslati / Oueslati                      | From Ouslati region (toponymy)                    |                         |
| 97             | Pajarera<br>Pajarero                                                                                                                                                                                                                                                                                   | ESP<br>ESP                                                                              | Pajarera / o                            | Birds' nest (sweet fruits preferred by the birds) | [42]                    |
| 98             | Palomar<br>Palomillo                                                                                                                                                                                                                                                                                   | ESP<br>ESP                                                                              | Palomar / Palomillo                     | Pigeon nest / dovecote                            | [42]                    |
| 99             | Pendolino<br>Penjoll                                                                                                                                                                                                                                                                                   | ITA<br>ESP                                                                              | Pendolino / Penjoll                     | Weeping tree (branches)                           |                         |
| 100            | Picholine<br>Picholine Marocaine<br>Picholine-1091                                                                                                                                                                                                                                                     | FRA<br>MAR<br>FRA                                                                       | Picholine                               | Small thorny fruits                               | [3], [6], [24]          |

| Homonymy Group | Accessions/cultivars included in each homonymy group                                                                                                                          | Origin*                                                     | General denomination of homonymy groups          | General meaning of homonymy's denomination | Bibliographic reference          |
|----------------|-------------------------------------------------------------------------------------------------------------------------------------------------------------------------------|-------------------------------------------------------------|--------------------------------------------------|--------------------------------------------|----------------------------------|
| 101            | Picual de Almería<br>Picual de Estepa<br>Picual                                                                                                                               | ESP<br>ESP<br>ESP                                           | Picual                                           | Pointed shape of fruits                    | [3], [4], [6], [28], [42]        |
| 102            | Picuda de Luis<br>Picudo<br>Picudo Blanco de Estepa<br>Picudo de Fruto Rojo<br>Picudo de la Axerquía<br>Picudo de la Rioja<br>Picudo de Labata<br>Picudo de Montoro           | ESP<br>ESP<br>ESP<br>ESP<br>ESP<br>ESP<br>ESP<br>ESP        | Picudo / Picuda                                  | Fruits with curved apex / nipples          | [3], [4], [6], [28], [42], [101] |
| 103            | Pizz'e Carroga<br>Pizzo di Corvo                                                                                                                                              | ITA<br>ITA                                                  | Pizzè / Pizzo                                    | Crow's beak                                | [1], [29]                        |
| 104            | Racimal<br>Racimal de Jaén<br>Racimo                                                                                                                                          | ESP<br>ESP<br>ESP                                           | Racimo / Racimal                                 | Fructification in bunch like grapes        | [42]                             |
| 105            | Redondil<br>Redondilla de Grazalema<br>Redondilla de Logroño<br>Ronde de la Ménara<br>Ronde de Meliana<br>Tonda di Cagliari<br>Tonda di Villacidro<br>Tonda Iblea<br>Tondello | PRT<br>ESP<br>ESP<br>MAR<br>DZA<br>ITA<br>ITA<br>ITA<br>ITA | Redondil / Redondilla / Ronde / Tonda / Tondello | Round shaped fruits                        | [3], [42]                        |
| 106            | Remmani-1762<br>Remmani-2081                                                                                                                                                  | LBN<br>LBN                                                  | Remmani                                          | Pomegranate                                |                                  |

| Homonymy Group | Accessions/cultivars included in each homonymy group | Origin* | General denomination of homonymy groups | General meaning of homonymy's denomination    | Bibliographic reference     |
|----------------|------------------------------------------------------|---------|-----------------------------------------|-----------------------------------------------|-----------------------------|
| 107            | Rojal                                                | ESP     | Rojal / Rossellino / Rosciola /         | Reddish / red fruit                           | [3], [29], [42], [79], [95] |
|                | Rojal de Valencia                                    | ESP     | Rosino / Rosselo / Rougette /           |                                               |                             |
|                | Rosciola                                             | ITA     | Royal / Royeta / Royuela                |                                               |                             |
|                | Rosino                                               | ITA     |                                         |                                               |                             |
|                | Rossellino                                           | ITA     |                                         |                                               |                             |
|                | Rossello                                             | ITA     |                                         |                                               |                             |
|                | Rougette de l'Ardèche                                | FRA     |                                         |                                               |                             |
|                | Rougette de Metidja                                  | DZA     |                                         |                                               |                             |
|                | Rougette de Pignans                                  | FRA     |                                         |                                               |                             |
|                | Royal                                                | ESP     |                                         |                                               |                             |
|                | Royal de Belchite                                    | ESP     |                                         |                                               |                             |
|                | Royal de Calatayud                                   | ESP     |                                         |                                               |                             |
|                | Royal de Calatayud-47                                | ESP     |                                         |                                               |                             |
|                | Royal de Cazorla                                     | ESP     |                                         |                                               |                             |
|                | Royal de Sabiñán                                     | ESP     |                                         |                                               |                             |
|                | Royeta de Abizanda                                   | ESP     |                                         |                                               |                             |
|                | Royeta de Asque                                      | ESP     |                                         |                                               |                             |
|                | Royuela                                              | ESP     |                                         |                                               |                             |
| 108            | Rosai-1809                                           | JOR     | Rosai                                   | Hitting for preparing olives for table olives |                             |
|                | Rosai-2254                                           | JOR     |                                         |                                               |                             |
| 109            | Safrawi                                              | SYR     | Safrawi                                 | Yellow fruits                                 | [3], [6]                    |
|                | Safrawi-1116                                         | SYR     |                                         |                                               |                             |
| 110            | Saifi                                                | SYR     | Saifi / Sayfi                           | Summer / summerly / early bearing             |                             |
|                | Sayfi                                                | SYR     |                                         |                                               |                             |
|                | Sayfi-2325                                           | TUR     |                                         |                                               |                             |
| 111            | Samsun Kirmizi Tuzlamalik                            | TUR     | Samsun / Tuzlamalik                     | From Samsun (toponymy) / Salted (fruits)      | [46]                        |
|                | Samsun Tuzlamalik                                    | TUR     |                                         |                                               |                             |
|                | Samsun Ufak Tuzlamalik                               | TUR     |                                         |                                               |                             |



| Homonymy Group | Accessions/cultivars included in each homonymy group                                                              | Origin*                                       | General denomination of homonymy groups        | General meaning of homonymy's denomination | Bibliographic reference |
|----------------|-------------------------------------------------------------------------------------------------------------------|-----------------------------------------------|------------------------------------------------|--------------------------------------------|-------------------------|
| 112            | Samsun Salamuralik<br>Siyah Salamuralik (Tekirdag)                                                                | TUR<br>TUR                                    | Salamuralik                                    | Brined (fruits)                            | [46]                    |
| 113            | San Pedro<br>Sant' Agostino<br>San Francesco<br>San Lazzero<br>Santa Caterina<br>Santa Martinenga                 | CHL<br>ITA<br>ITA<br>ITA<br>ITA<br>ITA        | San / Sant(a)                                  | Saint                                      | [1], [29]               |
| 114            | Sari Hasebi (Hatay)<br>Sari ulak                                                                                  | TUR<br>TUR                                    | Sari                                           | Yellow fruits                              | [46]                    |
| 115            | Sayali<br>Sayali T-1677<br>Sayali T-1728                                                                          | TUN<br>TUN<br>TUN                             | Sayali                                         | Oil                                        |                         |
| 116            | Sevillana<br>Sevillana (Azapa)<br>Sevillano de Jumilla<br>Sevillanca<br>Sivigliana da Olio<br>Sivigliana da Mensa | ESP<br>CHL<br>ESP<br>ESP<br>ITA<br>ITA        | Sevillano / Sevillana / Sevilenca / Sivigliano | From Sevilla (toponymy)                    | [1], [3], [83]          |
| 117            | Shame<br>Shame-1620<br>Shami Modabl<br>Shami-1041<br>Shami-141<br>Shami-2259<br>Shami-953                         | SYR<br>SYR<br>SYR<br>SYR<br>SYR<br>JOR<br>SYR | Shami / Shame                                  | From Damasco (toponymy)                    | [3], [102]              |
| 118            | Shengeh Manjil<br>Shengeh Sur                                                                                     | IRN<br>IRN                                    | Shengeh                                        |                                            | [47], [108]             |

| Homonymy Group | Accessions/cultivars included in each homonymy group                                                    | Origin*                                | General denomination of homonymy groups | General meaning of homonymy's denomination | Bibliographic reference |
|----------------|---------------------------------------------------------------------------------------------------------|----------------------------------------|-----------------------------------------|--------------------------------------------|-------------------------|
| 119            | Sinop<br>Sinop no 2<br>Sinop no 6                                                                       | TUR<br>TUR<br>TUR                      | Sinop                                   | From Sinop (toponymy)                      | [46]                    |
| 120            | Saurani<br>Sorani<br>Sorani-1566<br>Souri<br>Souri-1589<br>Soury Lari                                   | TUR<br>SYR<br>SYR<br>ISR<br>SYR<br>LBN | Saurani / Sorani / Souri                | From Tyre / Sor (toponymy)                 |                         |
| 121            | Stanboli-991<br>Stanbouli                                                                               | SYR<br>SYR                             | Stanbouli / Stanboli                    | From Istanbul (toponymy)                   |                         |
| 122            | Stara Maslina-1999<br>Stara Maslina-2005                                                                | MNE<br>HRV                             | Stara maslina                           | Old olive                                  |                         |
| 123            | Tefah<br>Toffahi<br>Toffahi-1000<br>Toffehi Tataouine<br>Tufahi Tadmori                                 | DZA<br>EGY<br>SYR<br>TUN<br>SYR        | Tefah / Toffahi / Toffehi               | Apple fruit shape                          | [3], [6], [24], [102]   |
| 124            | Temprana de Montán<br>Tempranillo de Ayora<br>Tempranillo de Lucena<br>Tempranillo de Yeste<br>Temprano | ESP<br>ESP<br>ESP<br>ESP<br>ESP        | Temprana / Tempranillo / Temprano       | Early bearing or ripening                  | [4], [24], [42]         |
| 125            | Torcío<br>Torció de Cabra<br>Torció de Huelma                                                           | ESP<br>ESP<br>ESP                      | Torcío                                  | Crooked (olive tree)                       | [42]                    |

| Homonymy Group | Accessions/cultivars included in each homonymy group | Origin* | General denomination of homonymy groups | General meaning of homonymy's denomination | Bibliographic reference |
|----------------|------------------------------------------------------|---------|-----------------------------------------|--------------------------------------------|-------------------------|
| 126            | Ulliri i Holle i Himares                             | ALB     | Ulliri                                  | Olive                                      | [105], [106]            |
|                | Ulliri Shekullor Berat                               | ALB     |                                         |                                            |                         |
|                | Ulliri i Kuq                                         | ALB     |                                         |                                            |                         |
|                | Ulliri i Zi                                          | ALB     |                                         |                                            |                         |
| 127            | Ulliri i Bardhe Berat                                | ALB     | Ulliri i Bardhe                         | White olive fruit                          | [105], [106]            |
|                | Ulliri i Bardhe i Tiranes                            | ALB     |                                         |                                            |                         |
|                | Ulliri i Bardhe Kruje                                | ALB     |                                         |                                            |                         |
| 128            | Verdal de Alhama                                     | ESP     | Verde / Verdal / Verdala /              | Green / Greenish                           | [3], [4], [6],          |
|                | Verdal de Manresa                                    | ESP     |                                         |                                            |                         |
|                | Verdala                                              | ESP     | Verdiell / Verdilla                     |                                            | [24], [28], [42]        |
|                | Verdale                                              | FRA     |                                         |                                            |                         |
|                | Verdalón                                             | ESP     |                                         |                                            |                         |
|                | Verde Verdelho                                       | PRT     |                                         |                                            |                         |
|                | Verdeña                                              | ESP     |                                         |                                            |                         |
|                | Verdial de Badajoz                                   | ESP     |                                         |                                            |                         |
|                | Verdial de Cádiz                                     | ESP     |                                         |                                            |                         |
|                | Verdial de Huévar                                    | ESP     |                                         |                                            |                         |
|                | Verdial de Montefrío                                 | ESP     |                                         |                                            |                         |
|                | Verdial de Vélez-Málaga                              | ESP     |                                         |                                            |                         |
|                | Verdial de Vélez-Málaga-51                           | ESP     |                                         |                                            |                         |
|                | Verdiell                                             | ESP     |                                         |                                            |                         |
|                | Verdilla de Calatayud                                | ESP     |                                         |                                            |                         |

| Homonymy Group | Accessions/cultivars included in each homonymy group | Origin* | General denomination of homonymy groups | General meaning of homonymy's denomination | Bibliographic reference |
|----------------|------------------------------------------------------|---------|-----------------------------------------|--------------------------------------------|-------------------------|
| 129            | Yag Celebi (Tatayn)                                  | TUR     | Yag / Yaglik                            | Oil / oily                                 | [46]                    |
|                | Beyaz Yaglik                                         | TUR     |                                         |                                            |                         |
|                | Erdek Yaglik                                         | TUR     |                                         |                                            |                         |
|                | Kilis Yaglik                                         | TUR     |                                         |                                            |                         |
|                | Samsun Yaglik                                        | TUR     |                                         |                                            |                         |
|                | Yaglik Celebi                                        | TUR     |                                         |                                            |                         |
|                | Yerli Yaglik                                         | TUR     |                                         |                                            |                         |
|                | Edremit Yaglik                                       | TUR     |                                         |                                            |                         |
|                | Yag Zeytini                                          | TUR     |                                         |                                            |                         |
|                | Yaglik Sari Zeytin                                   | TUR     |                                         |                                            |                         |
| 130            | Yuvarlak Celebi                                      | TUR     | Yuvarlak                                | Round                                      | [46]                    |
|                | Yuvarlak Halhali                                     | TUR     |                                         |                                            |                         |
|                | Iri Yuvarlak                                         | TUR     |                                         |                                            |                         |
| 131            | Zard                                                 | IRN     | Zard                                    | Yellow                                     |                         |
|                | Zard-1810                                            | IRN     |                                         |                                            |                         |
| 132            | Zarrazi                                              | TUN     | Zarrazi                                 | Bitter taste (table olives)                | [41]                    |
|                | Zarrazi Douirat                                      | TUN     |                                         |                                            |                         |
|                | Zarrazi Injassi                                      | TUN     |                                         |                                            |                         |
|                | Zarrazi Zarzis                                       | TUN     |                                         |                                            |                         |
|                | Zarrazyet Sned                                       | TUN     |                                         |                                            |                         |

\*ALB=Albania ; ARG=Argentina ; BiH=Bosnia and Herzegovina ; CYP=Cyprus ; CHL=Chile ; DZA=Algeria ; EGY=Egypt ; ESP=Spain ; FRA=France ; GRC=Greece ; HRV=Croatia ; IRN=Iran ; IRQ=Iraq ; ISR=Israel ; ITA=Italy ; JOR=Jordan ; LBN=Lebanon ; MAR=Morocco ; MEX=Mexico ; MNE=Montenegro ; PAK=Pakistan ; PER=Peru ; PRT=Portugal ; SVN=Slovenia ; SYR=Syria ; TUN=Tunisia ; TUR=Turkey ; URU=Uruguay ; USA=United States of America
