# Supplementary material for: Utility of EST-SNP Markers for Improving Management and Use of Olive Genetic Resources: A Case Study at the Worldwide Olive Germplasm Bank of Córdoba
Source: MDPI journal article supplement (doi:10.3390/plants11070921), 2022-03-29
Supplement: s1 [file s1]

**Supplemental Table S3:** Accessions included in each synonymy group detected by means of the 96 EST-SNP markers and previous bibliographic references.

| Accessions/cultivars included in each synonymy group                                                                                                                                                                                                                                                                                 | Previous bibliographic reports of synonymy                                                                                                                                                                                                                                                                                                                                | Synonymy Group |
|--------------------------------------------------------------------------------------------------------------------------------------------------------------------------------------------------------------------------------------------------------------------------------------------------------------------------------------|---------------------------------------------------------------------------------------------------------------------------------------------------------------------------------------------------------------------------------------------------------------------------------------------------------------------------------------------------------------------------|----------------|
| <i>Ileña_1*</i> (PER), <i>Passulunara**</i> (ITA)                                                                                                                                                                                                                                                                                    |                                                                                                                                                                                                                                                                                                                                                                           | 1              |
| Filare (ITA), <b>Moraiolo</b> (ITA), Moraiolo T. Corsini (ITA), Morcaio (ITA), Petit Ribier (FRA), Tondello (ITA)                                                                                                                                                                                                                    | Filare ([3]; [24]; [29]), Moraiolo T. Corsini ([3]; [6]; [16]; [24]; [30]), Morcaio ([3]), Petit Ribier ([79]), Tondello ([3]; [24])                                                                                                                                                                                                                                      | 2              |
| <i>Olivar de la Marina</i> (ESP), Olivo Macho de Santisteban Pto (ESP), <b>Picual</b> (ESP), Picual de Hoja Clara (ESP), Picual de Hoja Oscura (ESP),                                                                                                                                                                                | Olivo Macho de Santisteban Pto ([6]; [16]; [24]; [42]), Picual de Hoja Clara ([6]; [16]; [24]; [42]), Picual de Hoja Oscura ([6]; [16]; [24]; [42])                                                                                                                                                                                                                       | 3              |
| Alameño de Marchena (ESP), Cañivano Blanco (ESP), Hamrani (MAR), Haouzia (MAR), Menara (MAR), Misión de San Vicente (MEX), Mission Nieland (USA), <b>Picholine Marocaine</b> (MAR), <i>PM-M16</i> (MAR), <i>PM-S8</i> (MAR), Sigoise (DZA), <i>ZDH4</i> (MAR), <i>ZDH6</i> (MAR), Zeitun Ikhl (MAR), Zitoune DK (MAR), ZZ 10 (MAR)   | Alameño de Marchena ([3]; [6]; [16]; [24]), Cañivano Blanco ([6]; [16]; [17]; [80]; [81]), Hamrani ([3]), Haouzia ([3]; [6]), Menara ([3]; [6]), Misión de San Vicente ([3]; [6]), Mission Nieland ([3]; [6]), Sigoise ([3]; [5]; [6]; [17]; [82]), Zeitun Ikhl ([3]), Zitoune DK ([3])                                                                                   | 4              |
| Dafnelia (GRC), <b>Lechín de Granada</b> (ESP),                                                                                                                                                                                                                                                                                      | ([3])                                                                                                                                                                                                                                                                                                                                                                     | 5              |
| <i>Dužica</i> (MNE), <i>Esek Zeytini (Odemis)</i> (TUR), <b>Gaydoyrelia</b> (GRC), Grossa di Spagna (ITA)                                                                                                                                                                                                                            | Grossa di Spagna ([24])                                                                                                                                                                                                                                                                                                                                                   | 6              |
| Augellina (ITA), Baladi (Ain) (LBN), Baladi Tawil (LBN), Cailleitier (FRA), Correggiolo di Pallesse (ITA), Corsicana da Olio (ITA), <i>Dan</i> (SYR), <b>Frantoio</b> (ITA), Frantoio A. Corsini (ITA), Jlot-1965 (LBN), Larcianese (ITA), Maelia (ISR), Oblonga (USA), Puntino (ITA), Razzo (ITA), Razzola (ITA), San Lazzero (ITA) | Augellina ([1]; [3]) Baladi (Ain) ([3]), Baladi Tawil ([3]), Cailleitier ([3]; [79]), Correggiolo di Pallesse ([3]), Corsicana da Olio ([3]; [24]; [83]), Frantoio A. Corsini ([3]; [6]; [16]), Jlot-1965 ([3]), Larcianese ([1]; [3]), Maelia ([3]; [6]; [24]), Oblonga ([3]; [6]; [81]), Puntino ([3]), Razzo ([3]; [30]), Razzola ([3]; [30]; [85]), San Lazzero ([3]) | 7              |

| Accessions/cultivars included in each synonymy group                                                                                                                                                        | Previous bibliographic reports of synonymy                                                                                                                                                     | Synonymy Group |
|-------------------------------------------------------------------------------------------------------------------------------------------------------------------------------------------------------------|------------------------------------------------------------------------------------------------------------------------------------------------------------------------------------------------|----------------|
| Kelb et Ter-144 (SYR), <b>Lechín de Sevilla</b> (ESP), Mawi Stanboli (SYR), Nevadillo de San Vicente (MEX), Nevadillo Valle las Palmeras (MEX), S. George Greys (USA), <i>Souri-1589</i> (SYR), Zarza (ESP) | Nevadillo de San Vicente ([3]; [6]), Nevadillo Valle las Palmeras ([3]; [6]), S. George Greys ([3]; [6]; [86]), Zarza ([3]; [6]; [16]; [42])                                                   | 8              |
| Confetto (ITA), Majorca (ITA), Manna (ITA), Nera di Gonnos (ITA), <b>Nocellara Messinese</b> (ITA), Sivigliana da Mensa (ITA), Tonda di Cagliari (ITA)                                                      | Confetto ([1]; [3]; [83]; [87]; [88]; [89]), Majorca ([3]; [24]), Manna ([29]; [83]), Nera di Gonnos ([3]; [24]; [29]), Sivigliana da Mensa ([3]; [24]), Tonda di Cagliari ([3]; [24]; [29])   | 9              |
| Corsicana da Mensa (ITA), <b>Itrana</b> (ITA), Nera di Oliena (ITA), Paschixedda (ITA), <i>Pulazeqin</i> (ALB), Terza Grande (ITA), Terza Piccola (ITA), Tonda di Villacidro (ITA)                          | Corsicana da Mensa ([83]), Nera di Oliena ([3]; [24]; [29]; [83]), Paschixedda ([83]), Terza Grande ([3]; [24]; [83]), Terza Piccola ([29]; [83]), Tonda di Villacidro ([83])                  | 10             |
| Cordobés de la Aliseda (ESP), Cordovil de Castelo Branco (PRT), Corneja (ESP), Enagua de Arenas (ESP), Llorón de Iznalloz (ESP), <b>Verdial de Badajoz</b> (ESP)                                            | Cordobés de la Aliseda ([6]), Cordovil de Castelo Branco ([3]; [6]; [24]), Corneja ([3]; [6]), Enagua de Arenas ([3]; [6]), Llorón de Iznalloz ([3]; [6]), Verdial de Badajoz ([3]; [6]; [24]) | 11             |
| <b>Alameño de Montilla</b> (ESP), <i>Castacabra</i> (ESP), Marteño de la Carlota (ESP), Nevadillo Blanco de Osuna (ESP), Zarzariega de Orcera (ESP)                                                         | Marteño de la Carlota ([6]), Nevadillo Blanco de Osuna ([16]; [24]), Zarzariega de Orcera ([6]; [24])                                                                                          | 12             |
| Bella di Spagna (ITA), Giarraffa (ITA), <b>Gordal Sevillana</b> (ESP), Gordal Valle las Palmeras (MEX), Pizzo di Corvo (ITA), Santa Caterina (ITA), <i>Ters Yaprak</i> (TUR)                                | Bella di Spagna ([24]), Giarraffa -Pizzo di Corvo ([29]; [91]), Gordal Valle las Palmeras ([6]), Santa Caterina ([6]; [16]; [17]; [24]; [90])                                                  | 13             |
| <b>Americano</b> (ITA), Firenzuolo (ITA),                                                                                                                                                                   | Firenzuolo ([3])                                                                                                                                                                               | 14             |
| Manzanilla de Ayora (ESP), <b>Pequeña de Casas Ibáñez</b> (ESP)                                                                                                                                             | Manzanilla de Ayora ([6]; [16])                                                                                                                                                                | 15             |
| <i>Arancino</i> (ITA), Ciliegino (ITA), Pesciatino (ITA), Rosino (ITA), <b>Rossellino</b> (ITA)                                                                                                             | Ciliegino ([3]), Pesciatino ([3]), Rosino ([3]), Rossellino ([3])                                                                                                                              | 16             |

| Accessions/cultivars included in each synonymy group                                                                                                                                                                                                                                                                                                                                  | Previous bibliographic reports of synonymy                                                                                                                   | Synonymy Group |
|---------------------------------------------------------------------------------------------------------------------------------------------------------------------------------------------------------------------------------------------------------------------------------------------------------------------------------------------------------------------------------------|--------------------------------------------------------------------------------------------------------------------------------------------------------------|----------------|
| <b>Rosciola</b> (ITA), <i>Rossello</i> (ITA)                                                                                                                                                                                                                                                                                                                                          |                                                                                                                                                              | 17             |
| Bjelica (HRV), <i>Maiatica di Ferrandina</i> (ITA), <b>Ulliri i Bardhe i Tiranes</b> (ALB), <i>Ulliri i Bardhe Kruje</i> (ALB), Žutica (MNE)                                                                                                                                                                                                                                          | Bjelica-Zutica ([40])                                                                                                                                        | 18             |
| Gremignolo (ITA), <i>Kallmet Kokerrvogel</i> (ALB), <b>Leccino</b> (ITA), <i>Manzanilla Chilena</i> (CHL), <i>Palmarola</i> (ITA)                                                                                                                                                                                                                                                     | Gremignolo ([3])                                                                                                                                             | 19             |
| Ginestrino (ITA), <b>Maurino</b> (ITA),                                                                                                                                                                                                                                                                                                                                               | Ginestrino ([3])                                                                                                                                             | 20             |
| <b>Faresana</b> (ITA), <i>Olivo da Mensa</i> (ITA)                                                                                                                                                                                                                                                                                                                                    |                                                                                                                                                              | 21             |
| <b>Bosana</b> (ITA), Olieddu (ITA), Palma (ITA), Sassarese (ITA)                                                                                                                                                                                                                                                                                                                      | Bosana ([3]; [6]), Olieddu ([3]; [83]), Palma ([3]; [83]), Sassarese ([3])                                                                                   | 22             |
| Antawi (SYR), <i>Baladi Remadieh-1769</i> (LBN), <i>Celebi (Silifke)</i> (TUR), Cirujal (ESP), <i>Dal</i> (LBN), Dan-136 (SYR), <i>Dilmit</i> (TUR), <i>Erkençe</i> (TUR), Grossolana (ITA), <i>Hurma Kaba</i> (TUR), <i>Kanabisi</i> (JOR), <i>Marksi</i> (ALB), <b>Safrawi</b> (SYR), <i>Sari Habesi (Hatay)</i> (TUR), Shami-141 (SYR), Throubolia (GRC), <i>Yag Zeytini</i> (TUR) | Antawi described as molecular variant of Cirujal ([3]), Dan-136-Cirujal ([3]; [6]), Grossolana-Cirujal ([3]), Safrawi-Cirujal ([6]), Shami-141-Cirujal ([6]) | 23             |
| <b>Bianchera</b> (ITA), Istarska Bjelica (HRV), Istrka Belica (SVN), Plementa Bjelica (HRV)                                                                                                                                                                                                                                                                                           | Bianchera ([3]; [41]), Istarska Bjelica ([3]; [24]; [41]), Plementa Bjelica ([3]; [6]; [41])                                                                 | 24             |
| Barouni-1823 (TUN), Besbessi-1870 (TUN), Novo (ISR), <b>Uovo di Piccione</b> (ITA)                                                                                                                                                                                                                                                                                                    | Barouni-Besbessi ([43]), Novo-Uovo Piccione (Olea DB ([1]; [3]; [6])                                                                                         | 25             |
| <i>Kokerrmadhi i Beratit</i> (ALB), <b>Konservolia</b> (GRC), <i>Sant' Agostino</i> (ITA), <i>Tekirdag Cizmelik</i> (TUR)                                                                                                                                                                                                                                                             | Sant' Agostino syn of Amphissis ([3]) which at the same time is syn of Konservolia ([1])                                                                     | 26             |
| <b>Hojiblanca</b> (ESP), Verdial de Montefrío (ESP),                                                                                                                                                                                                                                                                                                                                  | Verdial de Montefrío ([6]; [24])                                                                                                                             | 27             |
| Blanquette de Gastu (DZA), Blanquette de Guelma (DZA), Chaïbi Antha (TUN), <b>Chetoui</b> (TUN), <i>Chetoui Tunis</i> (TUN), <i>Chetous</i> (DZA), <i>Sayali T-1677</i> (TUN)                                                                                                                                                                                                         | Blanquette de Gastu ([1]), Blanquette de Guelma ([3]; [92]; [93]), Chaïbi Antha ([3])                                                                        | 28             |
| Jaén-1 (ESP), Negrillo de Arjona (ESP), Nevadillo Negro de Jaén (ESP)                                                                                                                                                                                                                                                                                                                 | Nevadillo Negro de Jaén ([6])                                                                                                                                | 29             |
| Carrasqueño de Albuquerque (ESP), <b>Carrasqueño de Elvas</b> (PRT)                                                                                                                                                                                                                                                                                                                   | ([16])                                                                                                                                                       | 30             |
| <b>Callosina</b> (ESP), Cornicabra Murciana (ESP), Dehbia (MAR)                                                                                                                                                                                                                                                                                                                       | Cornicabra Murciana ([6]), Dehbia ([3])                                                                                                                      | 31             |

| Accessions/cultivars included in each synonymy group                                                                                                                                                                                                            | Previous bibliographic reports of synonymy                                                                                                                                                                           | Synonymy Group |
|-----------------------------------------------------------------------------------------------------------------------------------------------------------------------------------------------------------------------------------------------------------------|----------------------------------------------------------------------------------------------------------------------------------------------------------------------------------------------------------------------|----------------|
| Nevadillo Blanco de Lucena (ESP), <b>Tempranillo de Lucena</b> (ESP)                                                                                                                                                                                            | ([16])                                                                                                                                                                                                               | 32             |
| Cakir (TUR), <i>Hurma Karaca</i> (TUR), <b>Valanolia</b> (GRC),                                                                                                                                                                                                 | Valanolia-Cakir ([3]; [6]; [16])                                                                                                                                                                                     | 33             |
| <b>Hojiblanca de Navarrés</b> (ESP), <i>Ocal-25</i> (ESP), <i>Tomatillo</i> (ESP)                                                                                                                                                                               |                                                                                                                                                                                                                      | 34             |
| <b>Gerbouli</b> (TUN), Marsaline (TUN),                                                                                                                                                                                                                         | ([6])                                                                                                                                                                                                                | 35             |
| <b>Drobnica</b> (HRV), Morchiaio (ITA), Razzai (ITA), Sitnica (HRV)                                                                                                                                                                                             | Drobnica-Morchiaio-Sitnica ([3])                                                                                                                                                                                     | 36             |
| Beldi (TUN), Fakhari (TUN), Meski Zarzis (TUN), <b>Nocellara del Belice</b> (ITA), <i>Zarrazi</i> (TUN)                                                                                                                                                         | Beldi-Fakhari ([33]), Meski Zarzis -Fakhari (Tatouine) ([93]), Zarrazi syn of Giarfara ([3]) which at the same time is syn. of Nocellara del Bellice ([1])                                                           | 37             |
| <i>Blancal</i> (ESP), <b>Bolvino</b> (ESP), Negral de Sabiñán (ESP), Verdilla de Calatayud (ESP)                                                                                                                                                                | Negral de Sabiñán ([16]), Verdilla de Calatayud ([6])                                                                                                                                                                | 38             |
| Picudo de Montoro (ESP), <b>Varudo</b> (ESP)                                                                                                                                                                                                                    | Picudo de Montoro ([6]; [16]; [24])                                                                                                                                                                                  | 39             |
| <b>Coratina</b> (ITA), <i>San Pedro</i> (CHL)                                                                                                                                                                                                                   |                                                                                                                                                                                                                      | 40             |
| <b>Abunara</b> (ITA), Biancolilla (ITA)                                                                                                                                                                                                                         | ([3])                                                                                                                                                                                                                | 41             |
| <b>Moresca</b> (ITA), Nerba Catanese (ITA), Olivo di Castiglione (ITA)                                                                                                                                                                                          | Nerba Catanese ([3]), Olivo di Castiglione ([3])                                                                                                                                                                     | 42             |
| Abou Chawkeh (LBN), <i>Balah</i> (LBN), Jlot-976 (SYR), <b>Picholine</b> (FRA)                                                                                                                                                                                  | Abou Chawkeh ([3]), Jlot-976 ([3]; [6])                                                                                                                                                                              | 43             |
| Cordobés de Arroyo de la Luz (ESP), Gordal de Granada (ESP), Gordalejo (ESP), Kalb el Tair (LBN), Manzanilla de Jaén (ESP), Manzanilla del Centro (ESP), Nabali (ISR), Nabali Lari (LBN), Nabali Muhasan (JOR), Rasei (JOR), Rosai-1809 (JOR), Soury Lari (LBN) | Cordobés de Arroyo de la Luz, ([3]; [6]; [16]), Gordalejo ([3]; [6]; [16]), Manzanilla de Jaén ([3]; [6]; [16]), Manzanilla del Centro ([3]; [6]; [16]), Gordal de Granada ([3]; [6]; [16]), Nabali ([3]; [6]; [16]) | 44             |
| Adramitini (GRC), <b>Ayvalik</b> (TUR), Beyaz Yaglik (TUR), Edremit Yaglik (TUR)                                                                                                                                                                                | Adramitini ([1]; [24]), Ayvalik ([42]), Beyaz Yaglik ([16]; [24]; [81]), Edremit Yaglik ([6])                                                                                                                        | 45             |
| <b>Kaissy</b> (SYR), Khalkhali-789 (SYR), Shami-953 (SYR)                                                                                                                                                                                                       | Kaissy ([1]; [3]), Khalkhali-789 ([1]), Shami-953 ([6]; Baldoni et al., unpublished data)                                                                                                                            | 46             |

| Accessions/cultivars included in each synonymy group                                                                                                                            | Previous bibliographic reports of synonymy                                                                                                                                          | Synonymy Group |
|---------------------------------------------------------------------------------------------------------------------------------------------------------------------------------|-------------------------------------------------------------------------------------------------------------------------------------------------------------------------------------|----------------|
| Bouchouk laghlid (MAR), Gatuno (ESP), Gordal de Archidona (ESP), Gordal de Écija (ESP), <b>Ocal</b> (ESP), Picual de Estepa (ESP), Verdal de Alhama (ESP), Zms_1 (MAR)          | Bouchouk laghlid ([3]), Gatuno ([6]; [16]; [24]), Gordal de Archidona ([3]; [6]), Gordal de Ecija ([42]), Picual de Estepa ([16]; [24]), Verdal de Alhama ([24]; [16]), Zms_1 ([3]) | 47             |
| Manzanilla Picúa (ESP), <b>Menya</b> (ESP),                                                                                                                                     | ([6])                                                                                                                                                                               | 48             |
| <b>Gerboua</b> (TUN), Gerboui-1551 (TUN),                                                                                                                                       |                                                                                                                                                                                     | 49             |
| Chesna (ESP), Dulzal (ESP), <b>Manzanilla de Sevilla</b> (ESP), Manzanilla Valle las Palmeras (MEX), Redondil (ESP), Redondil (PRT), Stanboli-991 (SYR), <i>Stanbouli</i> (SYR) | Chesna ([6]; [16]; [17]; [24]), Dulzal ([6]; [16]; [24]), Manzanilla Valle las Palmeras ([6]), Redondil ([6]; [17]; [42]), Stanboli-991 ([6]; [16])                                 | 50             |
| Diferente (ESP), Jaén_2 (ESP)                                                                                                                                                   |                                                                                                                                                                                     | 51             |
| <b>Carrasqueña de Cañada</b> (ESP), <i>Fraga</i> (ESP), <i>Morruda de Salinas</i> (ESP),                                                                                        |                                                                                                                                                                                     | 52             |
| <i>Aimel (Setif)</i> (DZA), <b>Limli</b> (DZA)                                                                                                                                  |                                                                                                                                                                                     | 53             |
| Chemlali Nord (TUN), Chemlali Ouled Youssef (TUN), <b>Chemlali Sfax</b> (TUN), Mellahi Kotti (TUN), Zalmati (TUN), Zalmati Zarzis (TUN)                                         | Chemlali Nord ([41]), Chemlali Ouled Youssef ([93]), Mellahi Kotti ([93]), Zalmati ([1]; [33]; [98]), Zalmati Zarzis ([93])                                                         | 54             |
| Arauco (ARG), <b>Azapa</b> (CHL), <i>Sevillana (Azapa)</i> (CHL), <i>Sevillana (Tacna)</i> (CHL), <i>Suca</i> (CHL)                                                             | Arauco ([6]; [24]; [81])                                                                                                                                                            | 55             |
| <i>Cerasuola</i> (ITA), Zarrazi Douirat (TUN), Zarrazi Injassi (TUN), <b>Zarrazi Zarzis</b> (TUN), <i>Zarrazyet Sned</i> (TUN)                                                  | Zarrazi Douirat ([1]), Zarrazi Injassi ([1]; [94]), Zarrazi Zarzis ([94])                                                                                                           | 56             |
| <b>Abou Satl Mohazam</b> (SYR), <i>Mohazam Abou Satl</i> (SYR)                                                                                                                  | ([1])                                                                                                                                                                               | 57             |
| Chemlali Mahares (TUN), <b>Injassi Hchichina</b> (TUN),                                                                                                                         | ([93])                                                                                                                                                                              | 58             |
| <i>Chemchali</i> (TUN), Chemchali Gafsa (TUN), Ferkani (DZA), <b>Jemri Bouchouka</b> (TUN), Mekki (DZA)                                                                         | Chemchali Gafsa-Jemri Bouchouka ([93]), Ferkani-Jemri Bouchouka-Mekki ([3])                                                                                                         | 59             |
| Boukaila (DZA), <b>Bouricha</b> (DZA), Hamra (DZA)                                                                                                                              | Boukaila-Bouricha-Hamra ([3])                                                                                                                                                       | 60             |
| Derras (TUN), <b>R'Khami</b> (TUN),                                                                                                                                             | ([3])                                                                                                                                                                               | 61             |
| <i>Chemlali Bent Louzir</i> (TUN), <i>Khchinet Sig</i> (TUN), <b>Zeitoun Boubezzoula</b> (TUN)                                                                                  |                                                                                                                                                                                     | 62             |
| Abani (DZA), <b>Aeleh</b> (DZA)                                                                                                                                                 | ([3]; [67])                                                                                                                                                                         | 63             |

| Accessions/cultivars included in each synonymy group                                                                                                                   | Previous bibliographic reports of synonymy                                           | Synonymy Group |
|------------------------------------------------------------------------------------------------------------------------------------------------------------------------|--------------------------------------------------------------------------------------|----------------|
| Aggezi (EGY), <b>Aggizi Shame</b> (EGY)                                                                                                                                | ([1])                                                                                | 64             |
| <b>Koutsourelia</b> (GRC), Rachati I.Y.E.X (GRC)                                                                                                                       | ([44])                                                                               | 65             |
| <b>Aghchren de Titest</b> (DZA), Atounsi (Setif) (DZA)                                                                                                                 | ([3])                                                                                | 66             |
| <i>Majhol-1063</i> (SYR), <b>Tebabs</b> (SYR)                                                                                                                          |                                                                                      | 67             |
| <i>Royal de Belchite</i> (ESP), <b>Royal de Calatayud</b> (ESP), Verdeña (ESP)                                                                                         | Verdeña ([95])                                                                       | 68             |
| <i>Falsa Gordal Sevillana</i> (URU), <i>General Hornos</i> (URU), <b>Liguria</b> (CHL)                                                                                 |                                                                                      | 69             |
| Cordovil de Serpa (PRT), <b>Madural</b> (PRT)                                                                                                                          | ([3]; [6]; ([16])                                                                    | 70             |
| Manzanilla de Tortosa (ESP), <b>Morrut</b> (ESP)                                                                                                                       | ([3]; [6])                                                                           | 71             |
| Sevillana (ESP), <b>Sevillana de Abila</b> (ESP)                                                                                                                       | ([6])                                                                                | 72             |
| <b>Royal</b> (ESP), <i>Royuela</i> (ESP),                                                                                                                              |                                                                                      | 73             |
| Girit Zeytini (TUR), <b>Koroneiki</b> (GRC)                                                                                                                            | ([16]; [24]; [46])                                                                   | 74             |
| <b>Blanqueta</b> (ESP), <i>Blanqueta Gorda</i> (ESP)                                                                                                                   |                                                                                      | 75             |
| <b>Changlot Real</b> (ESP), Torcio de Cabra (ESP)                                                                                                                      | ([6])                                                                                | 76             |
| Ayrouni (LBN), <b>Verdial de Huevar</b> (ESP)                                                                                                                          | ([6])                                                                                | 77             |
| <b>Ahia-Ousbaa</b> (DZA), <i>Balbal</i> (DZA)                                                                                                                          |                                                                                      | 78             |
| <i>Oueslati T-1919</i> (TUN), <b>Ouslati</b> (TUN),                                                                                                                    |                                                                                      | 79             |
| Faruke (SYR), <b>Jlot</b> (SYR), Korakoy (CYP), <i>Nasouhi Jaba</i> (JOR)                                                                                              | Faruke-Korakoy-Jlot ([3])                                                            | 80             |
| <i>Chemlali Tataouine</i> (TUN), <b>Chemlali Zarzis</b> (TUN),                                                                                                         |                                                                                      | 81             |
| Asi Yeli (TUR), <b>Memecik</b> (TUR), Tasarasi (Aydin) (TUR), Tasarasi (Kusadasi) (TUR), Yerli Yaglik (TUR)                                                            | Asi Yeli-Yerli Yaglik-Memecik ([1]; [42]; [46]; [99]),<br>Tasarasi ([1]; [42]; [46]) | 82             |
| Halhali (Hatay) (TUR), <i>Kalembezi</i> (TUR), <i>Kilis Yaglik</i> (TUR), Sayfi-2325 (TUR), <i>Tesbih Celebi</i> (TUR), Yaglik Sari Zeytin (TUR), <b>Zaitiy</b> (SYR), | Halhali (Hatay)-Sayfi-Yaglik Sari Zeytin ([42])                                      | 83             |
| <i>Baladi (Fekhe)</i> (LBN), <b>Saifi</b> (SYR),                                                                                                                       |                                                                                      | 84             |
| <b>Trylia</b> (SYR), <i>Ulliri i Zi</i> (ALB),                                                                                                                         |                                                                                      | 85             |

| Accessions/cultivars included in each synonymy group                                                                                                                                                                                                                                                                                                                                                                                                                                                                                                                                                                                                                                                                                                                                                                                                                                                                                            | Previous bibliographic reports of synonymy                                                                                                                                                                                                   | Synonymy Group |
|-------------------------------------------------------------------------------------------------------------------------------------------------------------------------------------------------------------------------------------------------------------------------------------------------------------------------------------------------------------------------------------------------------------------------------------------------------------------------------------------------------------------------------------------------------------------------------------------------------------------------------------------------------------------------------------------------------------------------------------------------------------------------------------------------------------------------------------------------------------------------------------------------------------------------------------------------|----------------------------------------------------------------------------------------------------------------------------------------------------------------------------------------------------------------------------------------------|----------------|
| Abou Choki-1126 (SYR), <i>Arabi Altafila</i> (JOR), Aredhioy_2 (CYP), Athalassa (CYP), Ayitrimihias (CYP), <i>Ayrouni Amioun</i> (LBN), <i>Ayrouni-2077</i> (LBN), Bakuri (SYR), <i>Baladi (Ain Baal)</i> (LBN), <i>Baladi (Aitaroun)</i> (LBN), <i>Baladi (Koura)</i> (LBN), <i>Baladi Deir Aamass</i> (LBN), <i>Baladi Deir Memass</i> (LBN), <i>Baladi Hasrout</i> (LBN), <i>Baladi Janata</i> (LBN), <i>Baladi Jowaya (Qana)</i> (LBN), <i>Baladi Kfarzaina</i> (LBN), <i>Baladi (Qana)</i> (LBN), <i>Baladi Zgharta</i> (LBN), <b>Baladi</b> (LBN), Flasou (CYP), <i>Karamani-2326</i> (TUR), <i>Ketat</i> (JOR), <i>Kfari Beladi</i> (JOR), <i>Kfari Romi</i> (JOR), <i>Khodeiri</i> (SYR), <i>Kucuk Topak Ulak</i> (TUR), <i>Ladoelia</i> (CYP), <i>Lagoydhera</i> (CYP), <i>Nabali Baladi</i> (JOR), <i>Remmani-2081</i> (LBN), Roumani (Qana) (LBN), <i>Sabbighi</i> (LBN), <i>Saurani</i> (TUR), Sourani-1478 (SYR), Souri-1843 (ISR) | Abou Choki-1126 ([6]; [16]; [24]), Aredhioy_2 ([3]; [96]), Athalassa ([3]; [6]; [16]; [24]), Ayitrimihias ([3]; [96]), Bakuri ([3]), Baladi ([6]; [97]); Flasou ([96]), Lagoydhera ([3]; [96]), Roumani (Qana) ([3]), Sourani - Souri ([24]) | 86             |
| <b>Bouchoukra</b> (DZA), <i>Derdi</i> (DZA)                                                                                                                                                                                                                                                                                                                                                                                                                                                                                                                                                                                                                                                                                                                                                                                                                                                                                                     |                                                                                                                                                                                                                                              | 87             |
| <b>Belluti</b> (TUR), <i>Hirhali Celebi</i> (TUR), Yun Celebi (TUR)                                                                                                                                                                                                                                                                                                                                                                                                                                                                                                                                                                                                                                                                                                                                                                                                                                                                             | Yun Celebi-Belluti ([6]; [16]; [24])                                                                                                                                                                                                         | 88             |
| <b>Farga</b> (ESP), <i>Solimar</i> (ESP)                                                                                                                                                                                                                                                                                                                                                                                                                                                                                                                                                                                                                                                                                                                                                                                                                                                                                                        |                                                                                                                                                                                                                                              | 89             |
| <b>Grappolo</b> (ITA), Leccio del Corno (ITA), Marzio (ITA),                                                                                                                                                                                                                                                                                                                                                                                                                                                                                                                                                                                                                                                                                                                                                                                                                                                                                    | Leccio del Corno ([3]; [17]), Marzio ([3])                                                                                                                                                                                                   | 90             |
| Evrihoy_1 (CYP), Flasoy (CYP), <b>Kato Drys</b> (CYP), Klirou (CYP)                                                                                                                                                                                                                                                                                                                                                                                                                                                                                                                                                                                                                                                                                                                                                                                                                                                                             | Evrihoy_1 ([3]; [100]), Flasoy ([3]; [100]), Klirou ([3]; [6]; [16]; [96])                                                                                                                                                                   | 91             |
| <b>Buga</b> (HRV), Crnica-1976 (HRV), <i>Crnjaka</i> (MNE),                                                                                                                                                                                                                                                                                                                                                                                                                                                                                                                                                                                                                                                                                                                                                                                                                                                                                     | Crnica-Buga ([3])                                                                                                                                                                                                                            | 92             |
| Erdek Yaglik (TUR), <b>Gemlik</b> (TUR), Kfarzeta (SYR), Samsun Ufak Tuzlamalik (TUR), <i>Sinop no 2</i> (TUR), Siyah Salamuralik (Tekirdag) (TUR), <i>Sukare</i> (SYR)                                                                                                                                                                                                                                                                                                                                                                                                                                                                                                                                                                                                                                                                                                                                                                         | Erdek Yaglik ([3]; [6]; [16]; [24]; [42]), Kfarzeta ([3]), Samsun Ufak Tuzlamalik ([3]; [6]); Siyah Salamuralik (Tekirdag)([42])                                                                                                             | 93             |
| <b>Cañivano Negro-55</b> (ESP), <i>Zsb2</i> (MAR)                                                                                                                                                                                                                                                                                                                                                                                                                                                                                                                                                                                                                                                                                                                                                                                                                                                                                               |                                                                                                                                                                                                                                              | 94             |
| <i>Baladi Ijd Ibrine</i> (LBN), <i>Baladi Mabroum</i> (LBN), <i>Baladi Roumani</i> (LBN), <i>Bissani</i> (LBN), Doebl-1596 (SYR), Drmlali (SYR), Remmani-Doebl-Drmlali ([1]), Remmani-Drmlali ([3])                                                                                                                                                                                                                                                                                                                                                                                                                                                                                                                                                                                                                                                                                                                                             |                                                                                                                                                                                                                                              | 95             |
| 1762 (LBN), <b>Toffahi-1000</b> (SYR),                                                                                                                                                                                                                                                                                                                                                                                                                                                                                                                                                                                                                                                                                                                                                                                                                                                                                                          |                                                                                                                                                                                                                                              |                |
| <b>Djabali Kini-1572</b> (SYR), Killin (SYR)                                                                                                                                                                                                                                                                                                                                                                                                                                                                                                                                                                                                                                                                                                                                                                                                                                                                                                    | ([3])                                                                                                                                                                                                                                        | 96             |
| <i>Shame-1620</i> (SYR), <b>Shami Modabl</b> (SYR)                                                                                                                                                                                                                                                                                                                                                                                                                                                                                                                                                                                                                                                                                                                                                                                                                                                                                              | ([1])                                                                                                                                                                                                                                        | 97             |
| <i>Hemalassi</i> (SYR), <b>Shame</b> (SYR)                                                                                                                                                                                                                                                                                                                                                                                                                                                                                                                                                                                                                                                                                                                                                                                                                                                                                                      |                                                                                                                                                                                                                                              | 98             |



| Accessions/cultivars included in each synonymy group                                                                                | Previous bibliographic reports of synonymy                                            | Synonymy Group |
|-------------------------------------------------------------------------------------------------------------------------------------|---------------------------------------------------------------------------------------|----------------|
| <i>Abadi Shlal</i> (SYR), <b>Abbadi (SYR)</b> , <b>Abbadi Shalal</b> (SYR)                                                          | Abbadi-Abbadi Shalal ([3]; [6])                                                       | 99             |
| <b>Habichuelero de Grazalema</b> (ESP), <i>Hiloso</i> (ESP)                                                                         |                                                                                       | 100            |
| <b>Alameño de Cabra</b> (ESP), <i>Negrillo de Estepa</i> (ESP), <i>Negro de Aguilar</i> (ESP)                                       | <i>Negrillo de Estepa</i> ([16]; [24])                                                | 101            |
| <i>Ljubuški Stari Grad</i> (BiH), <b>Oblica</b> (HRV), <i>Studenci</i> (BiH)                                                        |                                                                                       | 102            |
| <b>Picudo</b> (ESP), <i>Picudo de Fruto Rojo</i> (ESP)                                                                              | ([6]; [16]; [24]; [42])                                                               | 103            |
| <i>Llorón de Ronda</i> (ESP), <b>Morona</b> (ESP)                                                                                   | ([3]; [6])                                                                            | 104            |
| <b>Lianolia Kerkyras</b> (GRC), <i>Ulliri i Holle i Himares</i> (ALB)                                                               |                                                                                       | 105            |
| <b>Alfafara</b> (ESP), <i>Royal de Villena</i> (ESP)                                                                                | ([3]; [6])                                                                            | 106            |
| <i>Azeitera</i> (PRT), <i>Azulejo</i> (ESP), <b>Manzanilla Cacereña</b> (ESP), <i>Negrinha</i> (PRT)                                | <i>Azeitera</i> ([3]; [6]; [17]; [81]), <i>Negrinha</i> ([3]; [6]; [17]; [81])        | 107            |
| <i>Hamza Celebi</i> (TUR), <b>Kan Celebi</b> (TUR)                                                                                  |                                                                                       | 108            |
| <b>Castellana</b> (ESP), <i>Racimo</i> (ESP)                                                                                        |                                                                                       | 109            |
| <i>Manzanilla de Requena</i> (ESP), <i>Meloncillo</i> (ESP), <b>Mollar de Cieza</b> (ESP), <i>Ojua</i> (ESP), <i>Verdalón</i> (ESP) | <i>Manzanilla de Requena</i> ([42]), <i>Meloncillo-Ojua-Verdalón</i> ([3]; [6]; [16]) | 110            |
| <i>Pecoso</i> (ESP), <b>Pico Limón</b> (ESP)                                                                                        | ([6]; [24])                                                                           | 111            |
| <i>Chemlal</i> (DZA), <b>Chemlal de Kabilye</b> (DZA)                                                                               | ([92])                                                                                | 112            |
| <i>Palomillo</i> (ESP), <b>Rechino</b> (ESP), <i>Belgentieroise</i> (FRA), <b>Merhavia</b> (ISR)                                    | ([6])                                                                                 | 113            |
| <i>Cerezuela</i> (ESP), <b>Morejona</b> (ESP)                                                                                       | ([3]; [6]; [16]; [24])                                                                | 114            |
| <b>Nevado Rizado</b> (ESP), <i>Torcio de Huelma</i> (ESP)                                                                           | ([6])                                                                                 | 115            |
| <i>Branquita de Elvas Red</i> (PRT), <b>Villalonga</b> (ESP)                                                                        | ([3]; [6]; [81])                                                                      | 116            |
| <i>Escarabajuelo de Ubeda</i> (ESP), <b>Jabaluna</b> (ESP)                                                                          | ([16])                                                                                | 117            |
| <b>Galega Vulgar</b> (PRT), <i>Getsemani</i> (MEX)                                                                                  |                                                                                       | 118            |
| <b>Empeltre</b> (ESP), <i>Grosal de Albocácer</i> (ESP)                                                                             | ([101])                                                                               | 119            |
| <b>Kalokerida</b> (GRC), <i>Oliviere</i> (FRA)                                                                                      | ([3])                                                                                 | 120            |
| <b>Mixani</b> (ALB), <i>Ulliri i Bardhe Berat</i> (ALB)                                                                             | ([6])                                                                                 | 121            |
| <i>Abbadi Abou Gabra-1033</i> (SYR), <b>Bent al Kadi</b> (SYR)                                                                      | ([6]; [24])                                                                           | 122            |
| <i>Janude-2</i> (SYR), <b>Karamani</b> (SYR)                                                                                        | <i>Janude-2</i> ([3])                                                                 | 123            |
| <b>Masabi</b> (SYR), <i>Mossabi</i> (SYR), <i>Shami-2259</i> (JOR)                                                                  | <i>Masabi-Mossabi</i> ([1])                                                           | 124            |



| Accessions/cultivars included in each synonymy group                                          | Previous bibliographic reports of synonymy | Synonymy Group |
|-----------------------------------------------------------------------------------------------|--------------------------------------------|----------------|
| <i>Ansasi</i> (SYR), <b><i>Ensasi</i></b> (SYR)                                               |                                            | 126            |
| <i>Cayet Roux</i> (FRA), <b><i>Mission Moojeski</i></b> (USA)                                 |                                            | 127            |
| <b><i>Aggizi Akse</i></b> (EGY), <i>Agizi Aas</i> (EGY)                                       |                                            | 128            |
| <b><i>Cayon</i></b> (FRA), <i>Rougette de Metidja</i> (DZA)                                   |                                            | 129            |
| <i>Gjykatesi</i> (ALB), <b><i>Kokerrmadh Elbasani</i></b> (ALB), <i>Krypsi i Krujes</i> (ALB) |                                            | 130            |
| <b><i>Longue de Meliana</i></b> (DZA), <i>Ronde de Meliana</i> (DZA)                          | ([3])                                      | 131            |
| <i>Hanefa</i> (SYR), <b><i>Zada</i></b> (SYR)                                                 |                                            | 132            |
| <b><i>Abo Anaked</i></b> (SYR), <i>Om Kanane</i> (SYR)                                        | ([84])                                     | 133            |
| <b><i>Buyuk Topak Ulak</i></b> (TUR), <i>Cilli</i> (TUR),                                     |                                            | 134            |
| <b><i>Hendero</i></b> (ESP), <i>Olivo de Nueva Carteya</i> (ESP)                              |                                            | 135            |
| <b><i>Carrasqueta De Ayora</i></b> (ESP), <i>Tempranillo de Ayora</i> (ESP)                   |                                            | 136            |
| <i>Eşek Zeytini</i> (Tekirdag) (TUR), <b><i>Thassitiki</i></b> (GRC)                          |                                            | 137            |
| <b><i>Brava</i></b> (ESP), <i>Desconocida Vx1</i> (ESP)                                       |                                            | 138            |
| <b><i>Celebi (Iznik)</i></b> (TUR), <i>Samsun Kirmizi Tuzlamalik</i> (TUR)                    |                                            | 139            |
| <b><i>Halhali Celebi</i></b> (TUR), <i>Yuvarlak Halhali</i> (TUR)                             | ([99])                                     | 140            |

\* In italics are indicated new observed synonymy cases

\*\* In bold are included the representative cultivars at WOGBC of each synonymy group
