# Supplementary material for: Utility of EST-SNP Markers for Improving Management and Use of Olive Genetic Resources: A Case Study at the Worldwide Olive Germplasm Bank of Córdoba
Source: MDPI journal article supplement (doi:10.3390/plants11070921), 2022-03-29
Supplement: s1 [file s1]

**Supplemental Table S6:** Analysis of molecular variance (AMOVA) for the partitioning of genetic variation in olive genotypes within and between Mediterranean regions (eastern/ central/ western)

| Source of variation   | df  | SS       | MS      | Est. Var. | %      | $\phi_{ST}$ | $P_{(\phi)}$ |
|-----------------------|-----|----------|---------|-----------|--------|-------------|--------------|
| <b>Among Regions</b>  | 2   | 1746.69  | 873,350 | 3883,000  | 9.08%  | 0.091       | <0.0001      |
| <b>Within Regions</b> | 665 | 25880.81 | 38.86   | 38.86     | 90.92% |             |              |

(*df* = degree of freedom, *SS* = sum of squares, *MS* = mean squares, *Est. var.* = estimate of variance, % = Percentage of total variation,  $\phi_{ST}$  = Phi statistic,  $P(\phi)$   $\phi_{ST}$  probability level after 9999 permutations)
