# Supplementary material for: Utility of EST-SNP Markers for Improving Management and Use of Olive Genetic Resources: A Case Study at the Worldwide Olive Germplasm Bank of Córdoba
Source: MDPI journal article supplement (doi:10.3390/plants11070921), 2022-03-29
Supplement: s1 [file s1]

**Supplemental Table S1:** Accessions from WOGBC (ESP-046) genotyped by means of EST-SNPs and including both field accessions and new acquired ones. The register number in the collection, name, number of trees/plants and the main area of cultivation are also indicated per each accession.

| <b>INIA-FAO<br/>collection<br/>code</b> | <b>Register<br/>Number of<br/>accessions</b> | <b>Type of material</b>                 | <b>Accession name</b>    | <b>No<br/>Trees/Plants</b> | <b>Origin*</b> |
|-----------------------------------------|----------------------------------------------|-----------------------------------------|--------------------------|----------------------------|----------------|
| ESP-046                                 | 1623                                         | New accession at propagation facilities | Abade Helo-1623          | 3                          | SYR            |
| ESP-046                                 | 1783                                         | Field accession                         | Abade Helo-1783          | 3                          | SYR            |
| ESP-046                                 | 1615                                         | New accession at propagation facilities | Abade Mour               | 3                          | SYR            |
| ESP-046                                 | 1576                                         | Field accession                         | Abadi Abou Chabra        | 2                          | SYR            |
| ESP-046                                 | 1780                                         | Field accession                         | Abadi Rassasi            | 3                          | SYR            |
| ESP-046                                 | 1579                                         | Field accession                         | Abadi Shlal              | 2                          | SYR            |
| ESP-046                                 | 1540                                         | Field accession                         | Abani                    | 2                          | DZA            |
| ESP-046                                 | 845                                          | Field accession                         | Abbadi                   | 2                          | SYR            |
| ESP-046                                 | 1033                                         | Field accession                         | Abbadi Abou Gabra-1033   | 2                          | SYR            |
| ESP-046                                 | 842                                          | Field accession                         | Abbadi Abou Gabra-842    | 1                          | SYR            |
| ESP-046                                 | 1034                                         | Field accession                         | Abbadi Shalal            | 2                          | SYR            |
| ESP-046                                 | 1621                                         | New accession at propagation facilities | Abd Shawka               | 2                          | SYR            |
| ESP-046                                 | 1624                                         | New accession at propagation facilities | Abo Akfa                 | 1                          | SYR            |
| ESP-046                                 | 1616                                         | New accession at propagation facilities | Abo Anaked               | 3                          | SYR            |
| ESP-046                                 | 1788                                         | Field accession                         | Abo Shawke               | 4                          | SYR            |
| ESP-046                                 | 1758                                         | Field accession                         | Abou Chawkeh             | 3                          | LBN            |
| ESP-046                                 | 1841                                         | Field accession                         | Abou Chawkeh             | 3                          | ISR            |
| ESP-046                                 | 1115                                         | Field accession                         | Abou Choki-1115          | 2                          | SYR            |
| ESP-046                                 | 1126                                         | Field accession                         | Abou Choki-1126          | 1                          | SYR            |
| ESP-046                                 | 840                                          | Field accession                         | Abou Kanani              | 2                          | SYR            |
| ESP-046                                 | 1755                                         | Field accession                         | Abou Monkar              | 3                          | EGY            |
| ESP-046                                 | 1043                                         | Field accession                         | Abou Satl Mohazam        | 3                          | SYR            |
| ESP-046                                 | 1324                                         | Field accession                         | Abunara                  | 2                          | ITA            |
| ESP-046                                 | 2155                                         | New accession at propagation facilities | Acebuche                 | 3                          | ESP            |
| ESP-046                                 | 800                                          | Field accession                         | Acebuche de Caravaca-800 | 2                          | ESP            |
| ESP-046                                 | 565                                          | Field accession                         | Acebuchera               | 2                          | ESP            |
| ESP-046                                 | 2022                                         | Field accession                         | Aceitunero-2022          | 3                          | ESP            |

| INIA-FAO<br>collection<br>code | Register<br>Number of<br>accessions | Type of material                        | Accession name       | No<br>Trees/Plants | Origin* |
|--------------------------------|-------------------------------------|-----------------------------------------|----------------------|--------------------|---------|
| ESP-046                        | 2249                                | New accession at propagation facilities | Aceitunero-2249      | 3                  | ESP     |
| ESP-046                        | 102                                 | Field accession                         | Adramitini           | 2                  | GRC     |
| ESP-046                        | 1541                                | Field accession                         | Aeleh                | 3                  | DZA     |
| ESP-046                        | 2329                                | New accession at propagation facilities | Agac no 7 (K. Maras) | 1                  | TUR     |
| ESP-046                        | 1100                                | Field accession                         | Aggezi               | 3                  | EGY     |
| ESP-046                        | 1738                                | Field accession                         | Aggizi Akse          | 2                  | EGY     |
| ESP-046                        | 1739                                | Field accession                         | Aggizi Oshime        | 2                  | EGY     |
| ESP-046                        | 1408                                | Field accession                         | Aggizi Shame         | 3                  | EGY     |
| ESP-046                        | 1737                                | Field accession                         | Aggizi Shame         | 5                  | EGY     |
| ESP-046                        | 1525                                | Field accession                         | Aghchren de Titest   | 2                  | DZA     |
| ESP-046                        | 1522                                | Field accession                         | Aghenaou             | 2                  | DZA     |
| ESP-046                        | 1517                                | Field accession                         | Aghenfas             | 2                  | DZA     |
| ESP-046                        | 1360                                | New accession at propagation facilities | Agizi Aas            | 3                  | EGY     |
| ESP-046                        | 2055                                | Field accession                         | Agizi Shami          | 3                  | EGY     |
| ESP-046                        | 1846                                | Field accession                         | Aglandau             | 3                  | FRA     |
| ESP-046                        | 692                                 | Field accession                         | Agouromanakolia      | 2                  | GRC     |
| ESP-046                        | 1377                                | Field accession                         | Agouromanakolia      | 3                  | GRC     |
| ESP-046                        | 1543                                | Field accession                         | Aharoune             | 2                  | DZA     |
| ESP-046                        | 1638                                | Field accession                         | Ahia-Ousbaa          | 2                  | DZA     |
| ESP-046                        | 1529                                | Field accession                         | Aimel                | 2                  | DZA     |
| ESP-046                        | 1645                                | Field accession                         | Aimel (Setif)        | 3                  | DZA     |
| ESP-046                        | 1325                                | Field accession                         | Aitana               | 3                  | ITA     |
| ESP-046                        | 2363                                | New accession at propagation facilities | Ak Zeytin            | 2                  | TUR     |
| ESP-046                        | 1951                                | Field accession                         | Akenane              | 2                  | DZA     |
| ESP-046                        | 1516                                | Field accession                         | Akerma               | 2                  | DZA     |
| ESP-046                        | 284                                 | Field accession                         | Alameño Blanco       | 2                  | ESP     |
| ESP-046                        | 285                                 | Field accession                         | Alameño de Cabra     | 2                  | ESP     |
| ESP-046                        | 254                                 | Field accession                         | Alameño de Marchena  | 4                  | ESP     |
| ESP-046                        | 39                                  | Field accession                         | Alameño de Montilla  | 2                  | ESP     |
| ESP-046                        | 50                                  | Field accession                         | Alameño de Montilla  | 1                  | ESP     |

| INIA-FAO<br>collection<br>code | Register<br>Number of<br>accessions | Type of material                        | Accession name          | No<br>Trees/Plants | Origin* |
|--------------------------------|-------------------------------------|-----------------------------------------|-------------------------|--------------------|---------|
| ESP-046                        | 2042                                | New accession at propagation facilities | Albareta                | 3                  | ESP     |
| ESP-046                        | 2246                                | New accession at propagation facilities | Albas                   | 2                  | ESP     |
| ESP-046                        | 1187                                | Field accession                         | Albatro                 | 3                  | ITA     |
| ESP-046                        | 605                                 | Field accession                         | Alfafara                | 4                  | ESP     |
| ESP-046                        | 2041                                | Field accession                         | Alía                    | 2                  | ESP     |
| ESP-046                        | 1188                                | Field accession                         | Allora                  | 3                  | ITA     |
| ESP-046                        | 778                                 | Field accession                         | Aloreña de Iznalloz     | 2                  | ESP     |
| ESP-046                        | 2283                                | New accession at propagation facilities | Aloreña_01              | 1                  | ESP     |
| ESP-046                        | 2284                                | New accession at propagation facilities | Aloreña_02              | 1                  | ESP     |
| ESP-046                        | 2285                                | New accession at propagation facilities | Aloreña_03              | 1                  | ESP     |
| ESP-046                        | 2286                                | New accession at propagation facilities | Aloreña_04              | 1                  | ESP     |
| ESP-046                        | 2287                                | New accession at propagation facilities | Aloreña_05              | 1                  | ESP     |
| ESP-046                        | 2288                                | New accession at propagation facilities | Aloreña_06              | 1                  | ESP     |
| ESP-046                        | 829                                 | Field accession                         | Aloreña-829             | 2                  | ARG     |
| ESP-046                        | 2039                                | New accession at propagation facilities | Alquecerana             | 2                  | ESP     |
| ESP-046                        | 367                                 | Field accession                         | Amargoso                | 6                  | ESP     |
| ESP-046                        | 1189                                | Field accession                         | Americano               | 2                  | ITA     |
| ESP-046                        | 1243                                | Field accession                         | Americano               | 2                  | ITA     |
| ESP-046                        | 2181                                | New accession at propagation facilities | Ampolleta               | 3                  | ESP     |
| ESP-046                        | 228                                 | Field accession                         | Amygdalolia Nana        | 4                  | GRC     |
| ESP-046                        | 696                                 | Field accession                         | Amygdalolia Nana        | 4                  | GRC     |
| ESP-046                        | 1560                                | New accession at propagation facilities | Ansasi                  | 2                  | SYR     |
| ESP-046                        | 1591                                | New accession at propagation facilities | Antawi                  | 3                  | SYR     |
| ESP-046                        | 2230                                | New accession at propagation facilities | Araban                  | 3                  | FRA     |
| ESP-046                        | 2261                                | New accession at propagation facilities | Arabi Altafeleh         | 3                  | JOR     |
| ESP-046                        | 1807                                | Field accession                         | Arabi Altafila          | 1                  | JOR     |
| ESP-046                        | 1190                                | Field accession                         | Arancino                | 2                  | ITA     |
| ESP-046                        | 833                                 | Field accession                         | Arauco                  | 2                  | ARG     |
| ESP-046                        | 1409                                | Field accession                         | Arauco Cuatricentenario | 3                  | ARG     |
| ESP-046                        | 231                                 | Field accession                         | Arbequina               | 3                  | ESP     |

| INIA-FAO<br>collection<br>code | Register<br>Number of<br>accessions | Type of material                        | Accession name          | No<br>Trees/Plants | Origin* |
|--------------------------------|-------------------------------------|-----------------------------------------|-------------------------|--------------------|---------|
| ESP-046                        | 1086                                | Field accession                         | Arbequina               | 1                  | ESP     |
| ESP-046                        | 1488                                | Field accession                         | Arbequina               | 7                  | ESP     |
| ESP-046                        | 666                                 | Field accession                         | Arbosana                | 3                  | ESP     |
| ESP-046                        | 1955                                | Field accession                         | Aredhioy_2              | 1                  | CYP     |
| ESP-046                        | 1068                                | Field accession                         | Argudell                | 2                  | ESP     |
| ESP-046                        | 994                                 | Field accession                         | Arroniz                 | 2                  | ESP     |
| ESP-046                        | 1455                                | Field accession                         | Ascolana Huasco         | 2                  | CHL     |
| ESP-046                        | 62                                  | Field accession                         | Ascolana Tenera         | 2                  | ITA     |
| ESP-046                        | 1244                                | Field accession                         | Ascolana Tenera         | 2                  | ITA     |
| ESP-046                        | 2279                                | New accession at propagation facilities | Ashrasse                | 3                  | IRQ     |
| ESP-046                        | 2368                                | New accession at propagation facilities | Asi Yeli                | 1                  | TUR     |
| ESP-046                        | 437                                 | Field accession                         | Asnal                   | 2                  | ESP     |
| ESP-046                        | 852                                 | Field accession                         | Athalassa               | 2                  | CYP     |
| ESP-046                        | 1642                                | Field accession                         | Atounsi (Setif)         | 3                  | DZA     |
| ESP-046                        | 1245                                | Field accession                         | Augellina               | 2                  | ITA     |
| ESP-046                        | 1952                                | Field accession                         | Ayitrimihias            | 3                  | CYP     |
| ESP-046                        | 134                                 | Field accession                         | Ayrouni                 | 3                  | LBN     |
| ESP-046                        | 2079                                | New accession at propagation facilities | Ayrouni Amioun          | 3                  | LBN     |
| ESP-046                        | 1599                                | New accession at propagation facilities | Ayrouni-1599            | 3                  | SYR     |
| ESP-046                        | 2077                                | New accession at propagation facilities | Ayrouni-2077            | 3                  | LBN     |
| ESP-046                        | 2352                                | New accession at propagation facilities | Ayvalik                 | 1                  | TUR     |
| ESP-046                        | 1456                                | Field accession                         | Azapa                   | 3                  | CHL     |
| ESP-046                        | 381                                 | Field accession                         | Azapa                   | 5                  | CHL     |
| ESP-046                        | 726                                 | Field accession                         | Azapa                   | 4                  | CHL     |
| ESP-046                        | 1549                                | Field accession                         | Azeboudi de Kirane-1549 | 2                  | DZA     |
| ESP-046                        | 1659                                | Field accession                         | Azeboudi de Kirane-1659 | 1                  | DZA     |
| ESP-046                        | 323                                 | Field accession                         | Azeitera                | 1                  | PRT     |
| ESP-046                        | 1530                                | Field accession                         | Azeradj                 | 1                  | DZA     |
| ESP-046                        | 1950                                | Field accession                         | Azeradj Tamorka         | 3                  | DZA     |
| ESP-046                        | 343                                 | Field accession                         | Azul                    | 2                  | ESP     |

| INIA-FAO<br>collection<br>code | Register<br>Number of<br>accessions | Type of material                        | Accession name       | No<br>Trees/Plants | Origin* |
|--------------------------------|-------------------------------------|-----------------------------------------|----------------------|--------------------|---------|
| ESP-046                        | 959                                 | Field accession                         | Azulejo              | 2                  | ESP     |
| ESP-046                        | 1748                                | Field accession                         | Baid El Hamam        | 2                  | EGY     |
| ESP-046                        | 1610                                | New accession at propagation facilities | Bakuri               | 3                  | SYR     |
| ESP-046                        | 133                                 | Field accession                         | Baladi               | 2                  | LBN     |
| ESP-046                        | 1765                                | Field accession                         | Baladi (Ain Baal)    | 2                  | LBN     |
| ESP-046                        | 1757                                | Field accession                         | Baladi (Ain)         | 2                  | LBN     |
| ESP-046                        | 2046                                | New accession at propagation facilities | Baladi (Aitaroun)    | 3                  | LBN     |
| ESP-046                        | 1761                                | Field accession                         | Baladi (Fekhe)       | 5                  | LBN     |
| ESP-046                        | 1773                                | Field accession                         | Baladi (Qana)        | 5                  | LBN     |
| ESP-046                        | 1764                                | Field accession                         | Baladi (Koura)       | 4                  | LBN     |
| ESP-046                        | 2086                                | New accession at propagation facilities | Baladi Deir Aamass   | 3                  | LBN     |
| ESP-046                        | 2092                                | New accession at propagation facilities | Baladi Deir Memass   | 1                  | LBN     |
| ESP-046                        | 2075                                | New accession at propagation facilities | Baladi Hasrout       | 4                  | LBN     |
| ESP-046                        | 2072                                | New accession at propagation facilities | Baladi Hermel-2072   | 3                  | LBN     |
| ESP-046                        | 2074                                | New accession at propagation facilities | Baladi Hermel-2074   | 3                  | LBN     |
| ESP-046                        | 2085                                | New accession at propagation facilities | Baladi Ijd Ibrine    | 3                  | LBN     |
| ESP-046                        | 2090                                | New accession at propagation facilities | Baladi Janata        | 3                  | LBN     |
| ESP-046                        | 2087                                | New accession at propagation facilities | Baladi Jowaya (Qana) | 3                  | LBN     |
| ESP-046                        | 2078                                | New accession at propagation facilities | Baladi Kfarzaina     | 3                  | LBN     |
| ESP-046                        | 1966                                | Field accession                         | Baladi Mabroum       | 3                  | LBN     |
| ESP-046                        | 2045                                | Field accession                         | Baladi Mabroum       | 3                  | LBN     |
| ESP-046                        | 2084                                | New accession at propagation facilities | Baladi Qana          | 3                  | LBN     |
| ESP-046                        | 1769                                | Field accession                         | Baladi Remadieh-1769 | 2                  | LBN     |
| ESP-046                        | 2082                                | New accession at propagation facilities | Baladi Remadieh-2082 | 2                  | LBN     |
| ESP-046                        | 1759                                | Field accession                         | Baladi Roumani       | 3                  | LBN     |
| ESP-046                        | 1756                                | Field accession                         | Baladi Tawil         | 2                  | LBN     |
| ESP-046                        | 2080                                | New accession at propagation facilities | Baladi Zgharta       | 3                  | LBN     |
| ESP-046                        | 1744                                | Field accession                         | Balady               | 2                  | EGY     |
| ESP-046                        | 2073                                | New accession at propagation facilities | Balah                | 4                  | LBN     |
| ESP-046                        | 1545                                | Field accession                         | Balbal               | 4                  | DZA     |

| INIA-FAO<br>collection<br>code | Register<br>Number of<br>accessions | Type of material                        | Accession name   | No<br>Trees/Plants | Origin* |
|--------------------------------|-------------------------------------|-----------------------------------------|------------------|--------------------|---------|
| ESP-046                        | 1916                                | Field accession                         | Balhi Sig        | 4                  | TUN     |
| ESP-046                        | 711                                 | Field accession                         | Barnea           | 2                  | ISR     |
| ESP-046                        | 1661                                | Field accession                         | Barouni-1661     | 2                  | TUN     |
| ESP-046                        | 1823                                | Field accession                         | Barouni-1823     | 2                  | TUN     |
| ESP-046                        | 1026                                | Field accession                         | Barri            | 3                  | SYR     |
| ESP-046                        | 1808                                | Field accession                         | Bathni           | 1                  | JOR     |
| ESP-046                        | 2258                                | New accession at propagation facilities | Bathni           | 3                  | JOR     |
| ESP-046                        | 1922                                | Field accession                         | Becarut          | 3                  | ESP     |
| ESP-046                        | 1561                                | New accession at propagation facilities | Bed al Igel      | 3                  | SYR     |
| ESP-046                        | 1663                                | Field accession                         | Beldi            | 3                  | TUN     |
| ESP-046                        | 2221                                | New accession at propagation facilities | Belgentieroise   | 3                  | FRA     |
| ESP-046                        | 1246                                | Field accession                         | Bella di Spagna  | 2                  | ITA     |
| ESP-046                        | 690                                 | Field accession                         | Belluti          | 3                  | TUR     |
| ESP-046                        | 1466                                | Field accession                         | Belluti          | 1                  | TUR     |
| ESP-046                        | 1029                                | Field accession                         | Bent al Kadi     | 1                  | SYR     |
| ESP-046                        | 1927                                | Field accession                         | Berri Meslal 3   | 1                  | MAR     |
| ESP-046                        | 1662                                | Field accession                         | Besbessi-1662    | 3                  | TUN     |
| ESP-046                        | 1870                                | Field accession                         | Besbessi-1870    | 3                  | TUN     |
| ESP-046                        | 683                                 | Field accession                         | Beyaz Yaglik     | 2                  | TUR     |
| ESP-046                        | 1753                                | Field accession                         | Bez el Anza      | 4                  | EGY     |
| ESP-046                        | 1247                                | Field accession                         | Bianchera        | 2                  | ITA     |
| ESP-046                        | 1248                                | Field accession                         | Biancolilla      | 2                  | ITA     |
| ESP-046                        | 1814                                | Field accession                         | Biancolilla-1814 | 1                  | ARG     |
| ESP-046                        | 387                                 | Field accession                         | Bical            | 2                  | ESP     |
| ESP-046                        | 1917                                | Field accession                         | Bidh Hmam        | 3                  | TUN     |
| ESP-046                        | 2242                                | New accession at propagation facilities | Biequeruda       | 3                  | ESP     |
| ESP-046                        | 1768                                | Field accession                         | Bissani          | 4                  | LBN     |
| ESP-046                        | 1975                                | Field accession                         | Bjelica          | 3                  | HRV     |
| ESP-046                        | 2245                                | Field accession                         | Blancal          | 1                  | ESP     |
| ESP-046                        | 11                                  | Field accession                         | Blanqueta        | 3                  | ESP     |

| INIA-FAO<br>collection<br>code | Register<br>Number of<br>accessions | Type of material                        | Accession name         | No<br>Trees/Plants | Origin* |
|--------------------------------|-------------------------------------|-----------------------------------------|------------------------|--------------------|---------|
| ESP-046                        | 48                                  | Field accession                         | Blanqueta              | 2                  | ESP     |
| ESP-046                        | 2172                                | New accession at propagation facilities | Blanqueta Gorda        | 3                  | ESP     |
| ESP-046                        | 1550                                | Field accession                         | Blanquette de Gastu    | 2                  | DZA     |
| ESP-046                        | 1532                                | Field accession                         | Blanquette de Guelma   | 2                  | DZA     |
| ESP-046                        | 631                                 | Field accession                         | Bodoquera              | 2                  | ESP     |
| ESP-046                        | 18                                  | Field accession                         | Bolvino                | 2                  | ESP     |
| ESP-046                        | 46                                  | Field accession                         | Bolvino                | 2                  | ESP     |
| ESP-046                        | 57                                  | Field accession                         | Bolvino                | 4                  | ESP     |
| ESP-046                        | 641                                 | Field accession                         | Bolvino                | 2                  | ESP     |
| ESP-046                        | 41                                  | Field accession                         | Borriolenca            | 2                  | ESP     |
| ESP-046                        | 611                                 | Field accession                         | Borriolenca            | 2                  | ESP     |
| ESP-046                        | 1170                                | Field accession                         | Bosana                 | 2                  | ITA     |
| ESP-046                        | 1327                                | Field accession                         | Bottone di Gallo       | 3                  | ITA     |
| ESP-046                        | 1937                                | Field accession                         | Bouchouika             | 1                  | MAR     |
| ESP-046                        | 1542                                | Field accession                         | Bouchouk Lafayette     | 3                  | DZA     |
| ESP-046                        | 1938                                | Field accession                         | Bouchouk Laghlid       | 2                  | MAR     |
| ESP-046                        | 1512                                | Field accession                         | Bouchouk Soummam 1     | 2                  | DZA     |
| ESP-046                        | 1546                                | Field accession                         | Bouchoukra             | 2                  | DZA     |
| ESP-046                        | 1518                                | Field accession                         | Boughenfous            | 2                  | DZA     |
| ESP-046                        | 1528                                | Field accession                         | Boukaila               | 2                  | DZA     |
| ESP-046                        | 1655                                | Field accession                         | Bouricha               | 4                  | DZA     |
| ESP-046                        | 63                                  | Field accession                         | Bouteillan             | 2                  | FRA     |
| ESP-046                        | 1174                                | Field accession                         | Brandofino             | 3                  | ITA     |
| ESP-046                        | 1328                                | Field accession                         | Brandofino             | 3                  | ITA     |
| ESP-046                        | 1475                                | Field accession                         | Branquita de Elvas Red | 2                  | PRT     |
| ESP-046                        | 2276                                | New accession at propagation facilities | Brava                  | 3                  | ESP     |
| ESP-046                        | 733                                 | Field accession                         | Buga                   | 2                  | HRV     |
| ESP-046                        | 2271                                | New accession at propagation facilities | Buga                   | 1                  | SVN     |
| ESP-046                        | 2387                                | New accession at propagation facilities | Buharica               | 2                  | HRV     |
| ESP-046                        | 255                                 | Field accession                         | Buidiego               | 1                  | ESP     |



| INIA-FAO<br>collection<br>code | Register<br>Number of<br>accessions | Type of material                        | Accession name              | No<br>Trees/Plants | Origin* |
|--------------------------------|-------------------------------------|-----------------------------------------|-----------------------------|--------------------|---------|
| ESP-046                        | 1159                                | Field accession                         | Buidiego                    | 2                  | ESP     |
| ESP-046                        | 2295                                | New accession at propagation facilities | Butko                       | 3                  | TUR     |
| ESP-046                        | 2318                                | New accession at propagation facilities | Buyuk Topak Ulak            | 1                  | TUR     |
| ESP-046                        | 1987                                | Field accession                         | Buža                        | 3                  | HRV     |
| ESP-046                        | 333                                 | Field accession                         | Caballo                     | 5                  | ESP     |
| ESP-046                        | 1847                                | Field accession                         | Cailleitier                 | 2                  | FRA     |
| ESP-046                        | 1751                                | Field accession                         | Cairo_7                     | 2                  | EGY     |
| ESP-046                        | 1094                                | Field accession                         | Cairo_7                     | 3                  | EGY     |
| ESP-046                        | 96                                  | Field accession                         | Cakir                       | 1                  | TUR     |
| ESP-046                        | 1329                                | Field accession                         | Calatina                    | 2                  | ITA     |
| ESP-046                        | 2222                                | New accession at propagation facilities | Calian                      | 3                  | FRA     |
| ESP-046                        | 2171                                | New accession at propagation facilities | Calles_1                    | 3                  | ESP     |
| ESP-046                        | 24                                  | Field accession                         | Callosina                   | 4                  | ESP     |
| ESP-046                        | 40                                  | Field accession                         | Callosina                   | 2                  | ESP     |
| ESP-046                        | 60                                  | Field accession                         | Callosina                   | 2                  | ESP     |
| ESP-046                        | 653                                 | Field accession                         | Canetera                    | 2                  | ESP     |
| ESP-046                        | 77                                  | Field accession                         | Caninese                    | 4                  | ITA     |
| ESP-046                        | 1163                                | Field accession                         | Caninese                    | 2                  | ITA     |
| ESP-046                        | 52                                  | Field accession                         | Cañivano Blanco             | 2                  | ESP     |
| ESP-046                        | 256                                 | Field accession                         | Cañivano Negro              | 2                  | ESP     |
| ESP-046                        | 259                                 | Field accession                         | Cañivano Negro              | 2                  | ESP     |
| ESP-046                        | 55                                  | Field accession                         | Cañivano Negro-55           | 1                  | ESP     |
| ESP-046                        | 1319                                | Field accession                         | Cariasina                   | 2                  | ITA     |
| ESP-046                        | 736                                 | Field accession                         | Carolea                     | 2                  | ITA     |
| ESP-046                        | 1249                                | Field accession                         | Carolea                     | 2                  | ITA     |
| ESP-046                        | 2180                                | New accession at propagation facilities | Carrasco                    | 3                  | ESP     |
| ESP-046                        | 1372                                | Field accession                         | Carrasqueña de Cañada       | 3                  | ESP     |
| ESP-046                        | 1457                                | Field accession                         | Carrasqueña Huasco          | 2                  | CHL     |
| ESP-046                        | 494                                 | Field accession                         | Carrasqueño de Alburquerque | 2                  | ESP     |
| ESP-046                        | 332                                 | Field accession                         | Carrasqueño de Alcaudete    | 2                  | ESP     |



| INIA-FAO<br>collection<br>code | Register<br>Number of<br>accessions | Type of material                        | Accession name           | No<br>Trees/Plants | Origin* |
|--------------------------------|-------------------------------------|-----------------------------------------|--------------------------|--------------------|---------|
| ESP-046                        | 125                                 | Field accession                         | Carrasqueño de Elvas     | 2                  | PRT     |
| ESP-046                        | 591                                 | Field accession                         | Carrasqueño de Jumilla   | 2                  | ESP     |
| ESP-046                        | 286                                 | Field accession                         | Carrasqueño de la Sierra | 2                  | ESP     |
| ESP-046                        | 795                                 | Field accession                         | Carrasqueño de Porcuna   | 2                  | ESP     |
| ESP-046                        | 2196                                | New accession at propagation facilities | Carrasqueta de Ayora     | 3                  | ESP     |
| ESP-046                        | 785                                 | Field accession                         | Carrasquillo             | 2                  | ESP     |
| ESP-046                        | 2248                                | Field accession                         | Caspolina                | 2                  | ESP     |
| ESP-046                        | 950                                 | Field accession                         | Castacabra               | 1                  | ESP     |
| ESP-046                        | 576                                 | Field accession                         | Castellana               | 3                  | ESP     |
| ESP-046                        | 1331                                | Field accession                         | Castriciana Rapparina    | 3                  | ITA     |
| ESP-046                        | 1332                                | Field accession                         | Cavaliere                | 2                  | ITA     |
| ESP-046                        | 2228                                | New accession at propagation facilities | Cayet Noir               | 1                  | FRA     |
| ESP-046                        | 2205                                | New accession at propagation facilities | Cayet Roux               | 3                  | FRA     |
| ESP-046                        | 1848                                | Field accession                         | Cayon                    | 2                  | FRA     |
| ESP-046                        | 2364                                | New accession at propagation facilities | Cekiste                  | 3                  | TUR     |
| ESP-046                        | 2317                                | New accession at propagation facilities | Celebi (Iznik)           | 1                  | TUR     |
| ESP-046                        | 2321                                | New accession at propagation facilities | Celebi (Silifke)         | 1                  | TUR     |
| ESP-046                        | 1333                                | Field accession                         | Cerasuola                | 3                  | ITA     |
| ESP-046                        | 331                                 | Field accession                         | Cerezuela                | 1                  | ESP     |
| ESP-046                        | 2214                                | New accession at propagation facilities | Cerisier                 | 3                  | FRA     |
| ESP-046                        | 2036                                | Field accession                         | Cerruda de Liesa         | 3                  | ESP     |
| ESP-046                        | 2034                                | Field accession                         | Cerruda de Olvena        | 3                  | ESP     |
| ESP-046                        | 1668                                | Field accession                         | Chaïbi Antha             | 3                  | TUN     |
| ESP-046                        | 220                                 | Field accession                         | Chalkidikis              | 4                  | GRC     |
| ESP-046                        | 1450                                | Field accession                         | Changlot                 | 3                  | ESP     |
| ESP-046                        | 15                                  | Field accession                         | Changlot Real            | 3                  | ESP     |
| ESP-046                        | 42                                  | Field accession                         | Changlot Real            | 3                  | ESP     |
| ESP-046                        | 1556                                | Field accession                         | Chemchali                | 1                  | TUN     |
| ESP-046                        | 1673                                | Field accession                         | Chemchali                | 2                  | TUN     |
| ESP-046                        | 1878                                | Field accession                         | Chemchali Gafsa          | 2                  | TUN     |

| INIA-FAO<br>collection<br>code | Register<br>Number of<br>accessions | Type of material                        | Accession name           | No<br>Trees/Plants | Origin* |
|--------------------------------|-------------------------------------|-----------------------------------------|--------------------------|--------------------|---------|
| ESP-046                        | 1526                                | Field accession                         | Chemlal                  | 2                  | DZA     |
| ESP-046                        | 118                                 | Field accession                         | Chemlal de Kabilye       | 3                  | DZA     |
| ESP-046                        | 1827                                | Field accession                         | Chemlali Balhi           | 2                  | TUN     |
| ESP-046                        | 1874                                | Field accession                         | Chemlali Bent Louzir     | 3                  | TUN     |
| ESP-046                        | 1912                                | Field accession                         | Chemlali Ghraiba         | 4                  | TUN     |
| ESP-046                        | 1892                                | Field accession                         | Chemlali Mahares         | 4                  | TUN     |
| ESP-046                        | 1910                                | Field accession                         | Chemlali Meliane         | 2                  | TUN     |
| ESP-046                        | 1552                                | Field accession                         | Chemlali Nord            | 1                  | TUN     |
| ESP-046                        | 1555                                | Field accession                         | Chemlali Nord            | 1                  | TUN     |
| ESP-046                        | 1865                                | Field accession                         | Chemlali Nord            | 3                  | TUN     |
| ESP-046                        | 1899                                | Field accession                         | Chemlali Ontha Tataouine | 3                  | TUN     |
| ESP-046                        | 1914                                | Field accession                         | Chemlali Ouled Msallem   | 4                  | TUN     |
| ESP-046                        | 1894                                | Field accession                         | Chemlali Ouled Youssef   | 3                  | TUN     |
| ESP-046                        | 1507                                | Field accession                         | Chemlali Sfax            | 1                  | TUN     |
| ESP-046                        | 1682                                | Field accession                         | Chemlali Sfax            | 3                  | TUN     |
| ESP-046                        | 1871                                | Field accession                         | Chemlali Sfax            | 3                  | TUN     |
| ESP-046                        | 1873                                | Field accession                         | Chemlali Sig             | 3                  | TUN     |
| ESP-046                        | 1901                                | Field accession                         | Chemlali Tataouine       | 2                  | TUN     |
| ESP-046                        | 1825                                | Field accession                         | Chemlali Zarzis          | 2                  | TUN     |
| ESP-046                        | 1880                                | Field accession                         | Chemlali Zarzis          | 4                  | TUN     |
| ESP-046                        | 374                                 | Field accession                         | Chesna                   | 2                  | ESP     |
| ESP-046                        | 113                                 | Field accession                         | Chetoui                  | 2                  | TUN     |
| ESP-046                        | 744                                 | Field accession                         | Chetoui                  | 2                  | TUN     |
| ESP-046                        | 1664                                | Field accession                         | Chetoui                  | 3                  | TUN     |
| ESP-046                        | 1678                                | Field accession                         | Chetoui Tunis            | 1                  | TUN     |
| ESP-046                        | 1723                                | Field accession                         | Chetoui Tunis            | 1                  | TUN     |
| ESP-046                        | 1868                                | Field accession                         | Chetoui Tunis-1868       | 4                  | TUN     |
| ESP-046                        | 1632                                | Field accession                         | Chetous                  | 1                  | DZA     |
| ESP-046                        | 1920                                | Field accession                         | Chiquitita               | 2                  | ESP     |
| ESP-046                        | 2206                                | New accession at propagation facilities | Chondrolia               | 3                  | GRC     |

| INIA-FAO<br>collection<br>code | Register<br>Number of<br>accessions | Type of material                        | Accession name                 | No<br>Trees/Plants | Origin* |
|--------------------------------|-------------------------------------|-----------------------------------------|--------------------------------|--------------------|---------|
| ESP-046                        | 402                                 | Field accession                         | Chorreao de Montefrio          | 2                  | ESP     |
| ESP-046                        | 29                                  | Field accession                         | Chorrúo                        | 2                  | ESP     |
| ESP-046                        | 361                                 | Field accession                         | Chorrúo de Castro del Río-361  | 2                  | ESP     |
| ESP-046                        | 1191                                | Field accession                         | Ciliegino                      | 3                  | ITA     |
| ESP-046                        | 2356                                | New accession at propagation facilities | Cilli                          | 2                  | TUR     |
| ESP-046                        | 1250                                | Field accession                         | Cima di Melfi                  | 2                  | ITA     |
| ESP-046                        | 90                                  | Field accession                         | Cipresino                      | 2                  | ITA     |
| ESP-046                        | 634                                 | Field accession                         | Cirujal                        | 2                  | ESP     |
| ESP-046                        | 2027                                | Field accession                         | Cirujal-2027                   | 3                  | ESP     |
| ESP-046                        | 2153                                | New accession at propagation facilities | Cirujal-2153                   | 3                  | ESP     |
| ESP-046                        | 124                                 | Field accession                         | Cobrancosa                     | 2                  | PRT     |
| ESP-046                        | 1316                                | Field accession                         | Confetto                       | 2                  | ITA     |
| ESP-046                        | 79                                  | Field accession                         | Coratina                       | 2                  | ITA     |
| ESP-046                        | 1251                                | Field accession                         | Coratina                       | 2                  | ITA     |
| ESP-046                        | 645                                 | Field accession                         | Corbella                       | 3                  | ESP     |
| ESP-046                        | 659                                 | Field accession                         | Corbella                       | 1                  | ESP     |
| ESP-046                        | 817                                 | Field accession                         | Corbella-817                   | 5                  | ESP     |
| ESP-046                        | 514                                 | Field accession                         | Cordobés de Arroyo de la Luz   | 2                  | ESP     |
| ESP-046                        | 879                                 | Field accession                         | Cordobés de la Aliseda         | 2                  | ESP     |
| ESP-046                        | 886                                 | Field accession                         | Cordovil de Castelo Branco     | 2                  | PRT     |
| ESP-046                        | 131                                 | Field accession                         | Cordovil de Serpa              | 2                  | PRT     |
| ESP-046                        | 511                                 | Field accession                         | Corneja                        | 2                  | ESP     |
| ESP-046                        | 20                                  | Field accession                         | Cornezuelo de Jaén             | 2                  | ESP     |
| ESP-046                        | 10                                  | Field accession                         | Cornicabra                     | 2                  | ESP     |
| ESP-046                        | 957                                 | Field accession                         | Cornicabra de Jerez Caballeros | 2                  | ESP     |
| ESP-046                        | 522                                 | Field accession                         | Cornicabra de Mérida           | 2                  | ESP     |
| ESP-046                        | 1087                                | Field accession                         | Cornicabra Murciana            | 2                  | ESP     |
| ESP-046                        | 790                                 | Field accession                         | Corralones de Andújar          | 2                  | ESP     |
| ESP-046                        | 1721                                | Field accession                         | Corralones de Andújar          | 2                  | ESP     |
| ESP-046                        | 1192                                | Field accession                         | Correggiolo di Pallesse        | 3                  | ITA     |

| INIA-FAO<br>collection<br>code | Register<br>Number of<br>accessions | Type of material                        | Accession name      | No<br>Trees/Plants | Origin* |
|--------------------------------|-------------------------------------|-----------------------------------------|---------------------|--------------------|---------|
| ESP-046                        | 1320                                | Field accession                         | Corsicana da Mensa  | 3                  | ITA     |
| ESP-046                        | 1321                                | Field accession                         | Corsicana da Olio   | 2                  | ITA     |
| ESP-046                        | 1252                                | Field accession                         | Craputea            | 2                  | ITA     |
| ESP-046                        | 1334                                | Field accession                         | Crastu              | 2                  | ITA     |
| ESP-046                        | 734                                 | Field accession                         | Crnica              | 2                  | HRV     |
| ESP-046                        | 2274                                | New accession at propagation facilities | Crnica              | 1                  | SVN     |
| ESP-046                        | 1976                                | Field accession                         | Crnica-1976         | 3                  | HRV     |
| ESP-046                        | 2000                                | Field accession                         | Crnjaka             | 3                  | MNE     |
| ESP-046                        | 1193                                | Field accession                         | Cucca               | 1                  | ITA     |
| ESP-046                        | 1194                                | Field accession                         | Cuoricino           | 2                  | ITA     |
| ESP-046                        | 1440                                | Field accession                         | Cuquello de la Jana | 2                  | ESP     |
| ESP-046                        | 2170                                | New accession at propagation facilities | Cuquello de la Jana | 3                  | ESP     |
| ESP-046                        | 2189                                | New accession at propagation facilities | Cuquello_1          | 3                  | ESP     |
| ESP-046                        | 1072                                | Field accession                         | Curivell            | 2                  | ESP     |
| ESP-046                        | 2229                                | New accession at propagation facilities | Curnet              | 1                  | FRA     |
| ESP-046                        | 1099                                | New accession at propagation facilities | D. de Egipto        | 3                  | EGY     |
| ESP-046                        | 1380                                | New accession at propagation facilities | Dafnelia            | 2                  | GRC     |
| ESP-046                        | 2280                                | New accession at propagation facilities | Dahgan              | 3                  | IRQ     |
| ESP-046                        | 2067                                | New accession at propagation facilities | Dal                 | 3                  | LBN     |
| ESP-046                        | 1585                                | Field accession                         | Dan                 | 3                  | SYR     |
| ESP-046                        | 136                                 | Field accession                         | Dan-136             | 2                  | SYR     |
| ESP-046                        | 2186                                | New accession at propagation facilities | Datilera de Caudiel | 2                  | ESP     |
| ESP-046                        | 403                                 | Field accession                         | Datilero            | 5                  | ESP     |
| ESP-046                        | 420                                 | Field accession                         | De Sal              | 1                  | ESP     |
| ESP-046                        | 1940                                | Field accession                         | Dehbia              | 3                  | MAR     |
| ESP-046                        | 1609                                | New accession at propagation facilities | Delle               | 3                  | SYR     |
| ESP-046                        | 1634                                | Field accession                         | Derdi               | 3                  | DZA     |
| ESP-046                        | 1667                                | Field accession                         | Derras              | 2                  | TUN     |
| ESP-046                        | 2277                                | New accession at propagation facilities | Desconocida Vx1     | 2                  | ESP     |
| ESP-046                        | 1481                                | Field accession                         | Desconocida-1481    | 3                  | ESP     |

| <b>INIA-FAO<br/>collection<br/>code</b> | <b>Register<br/>Number of<br/>accessions</b> | <b>Type of material</b>                 | <b>Accession name</b> | <b>No<br/>Trees/Plants</b> | <b>Origin*</b> |
|-----------------------------------------|----------------------------------------------|-----------------------------------------|-----------------------|----------------------------|----------------|
| ESP-046                                 | 2021                                         | Field accession                         | Desconocido-2021      | 2                          | ESP            |
| ESP-046                                 | 2026                                         | Field accession                         | Desconocido-2026      | 3                          | ESP            |
| ESP-046                                 | 1853                                         | Field accession                         | Dezfool               | 3                          | IRN            |
| ESP-046                                 | 1898                                         | Field accession                         | Dhokkar Nafti         | 3                          | TUN            |
| ESP-046                                 | 1511                                         | Field accession                         | Dhokkar Tataouine     | 3                          | TUN            |
| ESP-046                                 | 1686                                         | Field accession                         | Dhokkar Tataouine     | 3                          | TUN            |
| ESP-046                                 | 1734                                         | Field accession                         | Dhokkar Tataouine     | 4                          | TUN            |
| ESP-046                                 | 1900                                         | Field accession                         | Dhokkar Tataouine     | 2                          | TUN            |
| ESP-046                                 | 1717                                         | Field accession                         | Diferente             | 3                          | ESP            |
| ESP-046                                 | 2360                                         | New accession at propagation facilities | Dilmit                | 2                          | TUR            |
| ESP-046                                 | 1572                                         | Field accession                         | Djabali Kini-1572     | 3                          | SYR            |
| ESP-046                                 | 2057                                         | New accession at propagation facilities | Djabali Kini-2057     | 3                          | SYR            |
| ESP-046                                 | 1044                                         | Field accession                         | Doebli                | 3                          | SYR            |
| ESP-046                                 | 1596                                         | New accession at propagation facilities | Doebli-1596           | 3                          | SYR            |
| ESP-046                                 | 539                                          | Field accession                         | Dokkar                | 4                          | TUN            |
| ESP-046                                 | 2017                                         | Field accession                         | Dolça                 | 3                          | ESP            |
| ESP-046                                 | 724                                          | Field accession                         | Dolce                 | 2                          | EGY            |
| ESP-046                                 | 65                                           | Field accession                         | Dolce Agogia          | 2                          | ITA            |
| ESP-046                                 | 1363                                         | Field accession                         | Dolce Agogia          | 2                          | ITA            |
| ESP-046                                 | 94                                           | Field accession                         | Domat                 | 2                          | TUR            |
| ESP-046                                 | 2234                                         | New accession at propagation facilities | Dopia Pierias         | 3                          | GRC            |
| ESP-046                                 | 2238                                         | New accession at propagation facilities | Dopia Verias          | 3                          | GRC            |
| ESP-046                                 | 1594                                         | Field accession                         | Drmlali               | 3                          | SYR            |
| ESP-046                                 | 1990                                         | Field accession                         | Drobnica              | 3                          | HRV            |
| ESP-046                                 | 1992                                         | Field accession                         | Drobnica              | 3                          | MNE            |
| ESP-046                                 | 352                                          | Field accession                         | Dulzal                | 4                          | ESP            |
| ESP-046                                 | 31                                           | Field accession                         | Dulzal de Carmona     | 6                          | ESP            |
| ESP-046                                 | 1998                                         | Field accession                         | Dužica                | 3                          | MNE            |
| ESP-046                                 | 707                                          | Field accession                         | Dwarf D               | 2                          | USA            |
| ESP-046                                 | 1830                                         | Field accession                         | Ech Chahla            | 4                          | TUN            |

| INIA-FAO<br>collection<br>code | Register<br>Number of<br>accessions | Type of material                        | Accession name           | No<br>Trees/Plants | Origin* |
|--------------------------------|-------------------------------------|-----------------------------------------|--------------------------|--------------------|---------|
| ESP-046                        | 2311                                | New accession at propagation facilities | Edincik                  | 3                  | TUR     |
| ESP-046                        | 97                                  | Field accession                         | Edremit Yaglik           | 3                  | TUR     |
| ESP-046                        | 2338                                | New accession at propagation facilities | Egriburum (Nizip)        | 1                  | TUR     |
| ESP-046                        | 2340                                | New accession at propagation facilities | Egriburum (Tatayn)       | 3                  | TUR     |
| ESP-046                        | 1849                                | Field accession                         | El Chatan                | 3                  | DZA     |
| ESP-046                        | 1850                                | Field accession                         | El Kharfi                | 3                  | DZA     |
| ESP-046                        | 1745                                | Field accession                         | El Salam                 | 2                  | EGY     |
| ESP-046                        | 686                                 | Field accession                         | Elmacik                  | 2                  | TUR     |
| ESP-046                        | 1195                                | Field accession                         | Emilia                   | 3                  | ITA     |
| ESP-046                        | 13                                  | Field accession                         | Empeltre                 | 3                  | ESP     |
| ESP-046                        | 586                                 | Field accession                         | Enagua de Arenas         | 2                  | ESP     |
| ESP-046                        | 1124                                | Field accession                         | Ensasi                   | 2                  | SYR     |
| ESP-046                        | 681                                 | Field accession                         | Erdek Yaglik             | 2                  | TUR     |
| ESP-046                        | 2355                                | New accession at propagation facilities | Erkence                  | 2                  | TUR     |
| ESP-046                        | 779                                 | Field accession                         | Escarabajillo            | 2                  | ESP     |
| ESP-046                        | 1720                                | Field accession                         | Escarabajo               | 2                  | ESP     |
| ESP-046                        | 408                                 | Field accession                         | Escarabajuelo de Atarfe  | 2                  | ESP     |
| ESP-046                        | 293                                 | Field accession                         | Escarabajuelo de Posadas | 2                  | ESP     |
| ESP-046                        | 353                                 | Field accession                         | Escarabajuelo de Úbeda   | 2                  | ESP     |
| ESP-046                        | 2312                                | New accession at propagation facilities | Esek zeytini (Odemis)    | 2                  | TUR     |
| ESP-046                        | 2309                                | New accession at propagation facilities | Eşek zeytini (Tekirdag)  | 1                  | TUR     |
| ESP-046                        | 1957                                | Field accession                         | Evrihoy_1                | 1                  | CYP     |
| ESP-046                        | 1904                                | Field accession                         | Fakhari                  | 2                  | TUN     |
| ESP-046                        | 1928                                | Field accession                         | Fakhfoukha               | 3                  | MAR     |
| ESP-046                        | 1839                                | Field accession                         | Falsa Gordal Sevillana   | 2                  | URU     |
| ESP-046                        | 1253                                | Field accession                         | Faresana                 | 2                  | ITA     |
| ESP-046                        | 12                                  | Field accession                         | Farga                    | 2                  | ESP     |
| ESP-046                        | 1787                                | Field accession                         | Faruke                   | 1                  | SYR     |
| ESP-046                        | 1254                                | Field accession                         | Fasolina                 | 2                  | ITA     |
| ESP-046                        | 1255                                | Field accession                         | Fasolona                 | 2                  | ITA     |

| INIA-FAO<br>collection<br>code | Register<br>Number of<br>accessions | Type of material                        | Accession name        | No<br>Trees/Plants | Origin* |
|--------------------------------|-------------------------------------|-----------------------------------------|-----------------------|--------------------|---------|
| ESP-046                        | 1514                                | Field accession                         | Ferkani               | 2                  | DZA     |
| ESP-046                        | 822                                 | Field accession                         | Figueretes            | 2                  | ESP     |
| ESP-046                        | 1196                                | Field accession                         | Filare                | 2                  | ITA     |
| ESP-046                        | 1197                                | Field accession                         | Firenzuolo            | 3                  | ITA     |
| ESP-046                        | 1141                                | Field accession                         | Fishomi               | 3                  | IRN     |
| ESP-046                        | 851                                 | Field accession                         | Flasou                | 1                  | CYP     |
| ESP-046                        | 1958                                | Field accession                         | Flasoy                | 1                  | CYP     |
| ESP-046                        | 652                                 | Field accession                         | Forastera de Tortosa  | 2                  | ESP     |
| ESP-046                        | 1675                                | Field accession                         | Fouji Asli Gafsa-1675 | 1                  | TUN     |
| ESP-046                        | 1884                                | Field accession                         | Fouji Asli Gafsa-1884 | 3                  | TUN     |
| ESP-046                        | 1666                                | Field accession                         | Fouji Vert            | 3                  | TUN     |
| ESP-046                        | 1367                                | Field accession                         | Fraga                 | 3                  | ESP     |
| ESP-046                        | 1995                                | Field accession                         | Fram                  | 2                  | MNE     |
| ESP-046                        | 80                                  | Field accession                         | Frantoio              | 3                  | ITA     |
| ESP-046                        | 179                                 | Field accession                         | Frantoio              | 2                  | ITA     |
| ESP-046                        | 723                                 | Field accession                         | Frantoio              | 2                  | ITA     |
| ESP-046                        | 1038                                | Field accession                         | Frantoio              | 3                  | ITA     |
| ESP-046                        | 1080                                | Field accession                         | Frantoio              | 2                  | ITA     |
| ESP-046                        | 1198                                | Field accession                         | Frantoio              | 2                  | ITA     |
| ESP-046                        | 1256                                | Field accession                         | Frantoio              | 2                  | ITA     |
| ESP-046                        | 81                                  | Field accession                         | Frantoio A. Corsini   | 2                  | ITA     |
| ESP-046                        | 2496                                | New accession at propagation facilities | FS17                  | 3                  | ITA     |
| ESP-046                        | 656                                 | Field accession                         | Fulla de Salze        | 2                  | ESP     |
| ESP-046                        | 674                                 | Field accession                         | Fulla de Salze        | 2                  | ESP     |
| ESP-046                        | 2207                                | New accession at propagation facilities | Galatistas            | 3                  | GRC     |
| ESP-046                        | 128                                 | Field accession                         | Galega Vulgar         | 2                  | PRT     |
| ESP-046                        | 380                                 | Field accession                         | Gatuno                | 2                  | ESP     |
| ESP-046                        | 695                                 | Field accession                         | Gaydoyrelia           | 2                  | GRC     |
| ESP-046                        | 92                                  | Field accession                         | Gemlik                | 2                  | TUR     |
| ESP-046                        | 2064                                | New accession at propagation facilities | General Hornos        | 3                  | URU     |



| <b>INIA-FAO<br/>collection<br/>code</b> | <b>Register<br/>Number of<br/>accessions</b> | <b>Type of material</b>                 | <b>Accession name</b>     | <b>No<br/>Trees/Plants</b> | <b>Origin*</b> |
|-----------------------------------------|----------------------------------------------|-----------------------------------------|---------------------------|----------------------------|----------------|
| ESP-046                                 | 970                                          | Field accession                         | Genovesa                  | 2                          | ESP            |
| ESP-046                                 | 1725                                         | Field accession                         | Gerboua                   | 1                          | TUN            |
| ESP-046                                 | 538                                          | Field accession                         | Gerboui                   | 3                          | TUN            |
| ESP-046                                 | 1551                                         | Field accession                         | Gerboui-1551              | 1                          | TUN            |
| ESP-046                                 | 1672                                         | Field accession                         | Gerboui-1672              | 3                          | TUN            |
| ESP-046                                 | 1862                                         | Field accession                         | Gerboui-1862              | 3                          | TUN            |
| ESP-046                                 | 1854                                         | Field accession                         | Gerdeh                    | 3                          | IRN            |
| ESP-046                                 | 1438                                         | New accession at propagation facilities | Getsemani                 | 3                          | MEX            |
| ESP-046                                 | 1336                                         | Field accession                         | Giarraffa                 | 2                          | ITA            |
| ESP-046                                 | 2199                                         | New accession at propagation facilities | Gileta                    | 3                          | ESP            |
| ESP-046                                 | 1199                                         | Field accession                         | Ginestrino                | 2                          | ITA            |
| ESP-046                                 | 1200                                         | Field accession                         | Giogolino                 | 3                          | ITA            |
| ESP-046                                 | 2361                                         | New accession at propagation facilities | Girit Zeytini             | 1                          | TUR            |
| ESP-046                                 | 1084                                         | Field accession                         | Gjykatesi                 | 2                          | ALB            |
| ESP-046                                 | 1365                                         | Field accession                         | Gorda Limoncillo          | 3                          | ESP            |
| ESP-046                                 | 755                                          | Field accession                         | Gordal de Archidona       | 2                          | ESP            |
| ESP-046                                 | 261                                          | Field accession                         | Gordal de Écija           | 2                          | ESP            |
| ESP-046                                 | 761                                          | Field accession                         | Gordal de Granada         | 2                          | ESP            |
| ESP-046                                 | 567                                          | Field accession                         | Gordal de Hellín          | 4                          | ESP            |
| ESP-046                                 | 804                                          | Field accession                         | Gordal de Hellín          | 2                          | ESP            |
| ESP-046                                 | 2044                                         | Field accession                         | Gordal de Somontano       | 3                          | ESP            |
| ESP-046                                 | 781                                          | Field accession                         | Gordal de Vélez Rubio     | 2                          | ESP            |
| ESP-046                                 | 234                                          | Field accession                         | Gordal Sevillana          | 2                          | ESP            |
| ESP-046                                 | 1467                                         | Field accession                         | Gordal Sevillana          | 3                          | ESP            |
| ESP-046                                 | 1127                                         | Field accession                         | Gordal Valle las Palmeras | 3                          | MEX            |
| ESP-046                                 | 396                                          | Field accession                         | Gordalejo                 | 3                          | ESP            |
| ESP-046                                 | 2291                                         | New accession at propagation facilities | Gorvele                   | 3                          | TUR            |
| ESP-046                                 | 181                                          | Field accession                         | Grappolo                  | 1                          | ITA            |
| ESP-046                                 | 1201                                         | Field accession                         | Grappolo                  | 3                          | ITA            |
| ESP-046                                 | 1458                                         | Field accession                         | Grappolo Limari           | 2                          | CHL            |

| INIA-FAO<br>collection<br>code | Register<br>Number of<br>accessions | Type of material                        | Accession name            | No<br>Trees/Plants | Origin* |
|--------------------------------|-------------------------------------|-----------------------------------------|---------------------------|--------------------|---------|
| ESP-046                        | 2210                                | New accession at propagation facilities | Grassois                  | 3                  | FRA     |
| ESP-046                        | 1202                                | Field accession                         | Gremignolo                | 2                  | ITA     |
| ESP-046                        | 1203                                | Field accession                         | Gremignolo di Bolgheri    | 3                  | ITA     |
| ESP-046                        | 680                                 | Field accession                         | Girit Zeytini             | 2                  | TUR     |
| ESP-046                        | 1994                                | Field accession                         | Groginja                  | 3                  | MNE     |
| ESP-046                        | 811                                 | Field accession                         | Grosal de Albocácer       | 2                  | ESP     |
| ESP-046                        | 802                                 | Field accession                         | Grosal de Cieza           | 1                  | ESP     |
| ESP-046                        | 1069                                | Field accession                         | Grosal Vimbodí            | 2                  | ESP     |
| ESP-046                        | 1258                                | Field accession                         | Grossa di Spagna          | 2                  | ITA     |
| ESP-046                        | 1845                                | Field accession                         | Grossanne                 | 3                  | FRA     |
| ESP-046                        | 67                                  | Field accession                         | Grossanne-67              | 3                  | FRA     |
| ESP-046                        | 1527                                | Field accession                         | Grosse du Hamma           | 1                  | DZA     |
| ESP-046                        | 1204                                | Field accession                         | Grossolana                | 2                  | ITA     |
| ESP-046                        | 295                                 | Field accession                         | Habichuelero de Baena     | 2                  | ESP     |
| ESP-046                        | 2137                                | New accession at propagation facilities | Habichuelero de Baena     | 2                  | ESP     |
| ESP-046                        | 2163                                | New accession at propagation facilities | Habichuelero de Baena     | 3                  | ESP     |
| ESP-046                        | 366                                 | Field accession                         | Habichuelero de Grazalema | 4                  | ESP     |
| ESP-046                        | 2322                                | New accession at propagation facilities | Halhali (Hatay)           | 1                  | TUR     |
| ESP-046                        | 2332                                | New accession at propagation facilities | Halhali Celebi            | 3                  | TUR     |
| ESP-046                        | 2168                                | Field accession                         | Hamid                     | 1                  | EGY     |
| ESP-046                        | 1538                                | Field accession                         | Hamra                     | 2                  | DZA     |
| ESP-046                        | 1942                                | Field accession                         | Hamrani                   | 2                  | MAR     |
| ESP-046                        | 2333                                | New accession at propagation facilities | Hamza Celebi              | 2                  | TUR     |
| ESP-046                        | 1608                                | New accession at propagation facilities | Hanefa                    | 3                  | SYR     |
| ESP-046                        | 835                                 | Field accession                         | Haouzia                   | 2                  | MAR     |
| ESP-046                        | 2054                                | Field accession                         | Hembalassi                | 3                  | SYR     |
| ESP-046                        | 1567                                | New accession at propagation facilities | Hembalassi-1567           | 3                  | SYR     |
| ESP-046                        | 1002                                | Field accession                         | Hemblasi                  | 2                  | SYR     |
| ESP-046                        | 2164                                | New accession at propagation facilities | Hendero                   | 2                  | ESP     |
| ESP-046                        | 2157                                | New accession at propagation facilities | Hijarol                   | 3                  | ESP     |

| INIA-FAO<br>collection<br>code | Register<br>Number of<br>accessions | Type of material                        | Accession name         | No<br>Trees/Plants | Origin* |
|--------------------------------|-------------------------------------|-----------------------------------------|------------------------|--------------------|---------|
| ESP-046                        | 2053                                | Field accession                         | Hiloso                 | 3                  | ESP     |
| ESP-046                        | 2342                                | New accession at propagation facilities | Hirhali Celebi         | 1                  | TUR     |
| ESP-046                        | 2                                   | Field accession                         | Hojiblanca             | 5                  | ESP     |
| ESP-046                        | 59                                  | Field accession                         | Hojiblanca             | 2                  | ESP     |
| ESP-046                        | 1373                                | Field accession                         | Hojiblanca de Navarrés | 3                  | ESP     |
| ESP-046                        | 1559                                | New accession at propagation facilities | Humaisi                | 3                  | SYR     |
| ESP-046                        | 2354                                | New accession at propagation facilities | Hurma Kaba             | 2                  | TUR     |
| ESP-046                        | 2353                                | New accession at propagation facilities | Hurma Karaca           | 1                  | TUR     |
| ESP-046                        | 2347                                | New accession at propagation facilities | Hursuki                | 1                  | TUR     |
| ESP-046                        | 1557                                | Field accession                         | Idleb_1                | 3                  | SYR     |
| ESP-046                        | 1792                                | Field accession                         | Idleb_3                | 4                  | SYR     |
| ESP-046                        | 1547                                | Field accession                         | Ifiri                  | 2                  | DZA     |
| ESP-046                        | 2051                                | New accession at propagation facilities | Ileña_1                | 3                  | PER     |
| ESP-046                        | 297                                 | Field accession                         | Imperial               | 1                  | ESP     |
| ESP-046                        | 30                                  | Field accession                         | Imperial de Jaén       | 2                  | ESP     |
| ESP-046                        | 1889                                | Field accession                         | Injassi Gafsa          | 4                  | TUN     |
| ESP-046                        | 1893                                | Field accession                         | Injassi Hchichina      | 2                  | TUN     |
| ESP-046                        | 2343                                | New accession at propagation facilities | Iri Yuvarlak           | 3                  | TUR     |
| ESP-046                        | 735                                 | Field accession                         | Istarska Bjelica       | 2                  | HRV     |
| ESP-046                        | 1988                                | Field accession                         | Istarska Bjelica       | 3                  | HRV     |
| ESP-046                        | 1983                                | Field accession                         | Istarska Crnica        | 3                  | HRV     |
| ESP-046                        | 2272                                | New accession at propagation facilities | Istrka Belica          | 1                  | SVN     |
| ESP-046                        | 68                                  | Field accession                         | Itrana                 | 4                  | ITA     |
| ESP-046                        | 74                                  | Field accession                         | Itrana                 | 2                  | ITA     |
| ESP-046                        | 1259                                | Field accession                         | Itrana                 | 2                  | ITA     |
| ESP-046                        | 99                                  | Field accession                         | Izmir Sofralik         | 3                  | TUR     |
| ESP-046                        | 1118                                | Field accession                         | Jabali                 | 2                  | SYR     |
| ESP-046                        | 392                                 | Field accession                         | Jabaluna               | 2                  | ESP     |
| ESP-046                        | 1718                                | Field accession                         | Jaén_1                 | 3                  | ESP     |
| ESP-046                        | 1719                                | Field accession                         | Jaén_2                 | 3                  | ESP     |

| INIA-FAO<br>collection<br>code | Register<br>Number of<br>accessions | Type of material                        | Accession name      | No<br>Trees/Plants | Origin* |
|--------------------------------|-------------------------------------|-----------------------------------------|---------------------|--------------------|---------|
| ESP-046                        | 1602                                | New accession at propagation facilities | Janude_1            | 3                  | SYR     |
| ESP-046                        | 1603                                | New accession at propagation facilities | Janude_2            | 2                  | SYR     |
| ESP-046                        | 23                                  | Field accession                         | Jaropo              | 2                  | ESP     |
| ESP-046                        | 1869                                | Field accession                         | Jeddari Chaal       | 3                  | TUN     |
| ESP-046                        | 1510                                | Field accession                         | Jemri Bouchouka     | 1                  | TUN     |
| ESP-046                        | 1908                                | Field accession                         | Jemri Bouchouka     | 4                  | TUN     |
| ESP-046                        | 1732                                | Field accession                         | Jemri Dhokkar-1732  | 3                  | TUN     |
| ESP-046                        | 1907                                | Field accession                         | Jemri Dhokkar-1907  | 3                  | TUN     |
| ESP-046                        | 1004                                | Field accession                         | Jlot                | 3                  | SYR     |
| ESP-046                        | 1965                                | Field accession                         | Jlot-1965           | 3                  | LBN     |
| ESP-046                        | 841                                 | Field accession                         | Jlot-841            | 1                  | SYR     |
| ESP-046                        | 976                                 | Field accession                         | Jlot-976            | 3                  | SYR     |
| ESP-046                        | 667                                 | Field accession                         | Joanenca            | 3                  | ESP     |
| ESP-046                        | 1414                                | Field accession                         | Juca                | 3                  | MEX     |
| ESP-046                        | 1972                                | Field accession                         | Kadeshon            | 3                  | ISR     |
| ESP-046                        | 140                                 | Field accession                         | Kaissy              | 1                  | SYR     |
| ESP-046                        | 105                                 | Field accession                         | Kalamon             | 3                  | GRC     |
| ESP-046                        | 2068                                | New accession at propagation facilities | Kalb el Tair        | 3                  | LBN     |
| ESP-046                        | 2335                                | New accession at propagation facilities | Kalembezi           | 1                  | TUR     |
| ESP-046                        | 1171                                | Field accession                         | Kalinjot            | 2                  | ALB     |
| ESP-046                        | 1151                                | Field accession                         | Kallmet             | 3                  | ALB     |
| ESP-046                        | 1712                                | Field accession                         | Kallmet Kokerrvogel | 2                  | ALB     |
| ESP-046                        | 691                                 | Field accession                         | Kalokerida          | 2                  | GRC     |
| ESP-046                        | 688                                 | Field accession                         | Kan Celebi          | 2                  | TUR     |
| ESP-046                        | 2255                                | New accession at propagation facilities | Kanabisi            | 2                  | JOR     |
| ESP-046                        | 2365                                | New accession at propagation facilities | Kara Yaprak         | 3                  | TUR     |
| ESP-046                        | 1119                                | Field accession                         | Karamani            | 1                  | SYR     |
| ESP-046                        | 1564                                | New accession at propagation facilities | Karamani-1564       | 3                  | SYR     |
| ESP-046                        | 2326                                | New accession at propagation facilities | Karamani-2326       | 1                  | TUR     |
| ESP-046                        | 1986                                | Field accession                         | Karbunčela          | 3                  | HRV     |

| INIA-FAO<br>collection<br>code | Register<br>Number of<br>accessions | Type of material                        | Accession name  | No<br>Trees/Plants | Origin* |
|--------------------------------|-------------------------------------|-----------------------------------------|-----------------|--------------------|---------|
| ESP-046                        | 1606                                | New accession at propagation facilities | Karme           | 3                  | SYR     |
| ESP-046                        | 2208                                | New accession at propagation facilities | Karydolia       | 3                  | GRC     |
| ESP-046                        | 1959                                | Field accession                         | Kato Dris_1     | 3                  | CYP     |
| ESP-046                        | 848                                 | Field accession                         | Kato Drys       | 2                  | CYP     |
| ESP-046                        | 1913                                | Field accession                         | Kbiret Louzir   | 4                  | TUN     |
| ESP-046                        | 144                                 | Field accession                         | Kelb et Ter-144 | 2                  | SYR     |
| ESP-046                        | 145                                 | Field accession                         | Kelb et Ter-145 | 1                  | SYR     |
| ESP-046                        | 1563                                | New accession at propagation facilities | Kerdi           | 2                  | SYR     |
| ESP-046                        | 2256                                | New accession at propagation facilities | Ketat           | 2                  | JOR     |
| ESP-046                        | 2275                                | New accession at propagation facilities | Kfari Beladi    | 1                  | JOR     |
| ESP-046                        | 1804                                | Field accession                         | Kfari Romi      | 1                  | JOR     |
| ESP-046                        | 1789                                | Field accession                         | Kfarzeta        | 1                  | SYR     |
| ESP-046                        | 2501                                | Field accession                         | Kfarzeta-2501   | 1                  | SYR     |
| ESP-046                        | 1548                                | Field accession                         | Khadraia        | 2                  | DZA     |
| ESP-046                        | 1054                                | Field accession                         | Khalkhali       | 3                  | SYR     |
| ESP-046                        | 1107                                | Field accession                         | Khalkhali-1107  | 3                  | SYR     |
| ESP-046                        | 1595                                | New accession at propagation facilities | Khalkhali-1595  | 3                  | SYR     |
| ESP-046                        | 789                                 | Field accession                         | Khalkhali-789   | 2                  | SYR     |
| ESP-046                        | 1120                                | Field accession                         | Khashabi        | 2                  | SYR     |
| ESP-046                        | 1597                                | Field accession                         | Khashabi-1597   | 3                  | SYR     |
| ESP-046                        | 1895                                | Field accession                         | Khchinet Sig    | 3                  | TUN     |
| ESP-046                        | 1573                                | New accession at propagation facilities | Khello          | 3                  | SYR     |
| ESP-046                        | 1618                                | New accession at propagation facilities | Khnfse          | 3                  | SYR     |
| ESP-046                        | 1593                                | New accession at propagation facilities | Khodeiri        | 3                  | SYR     |
| ESP-046                        | 1613                                | New accession at propagation facilities | Khuokhe         | 3                  | SYR     |
| ESP-046                        | 2375                                | New accession at propagation facilities | Kilis yaglik    | 1                  | TUR     |
| ESP-046                        | 1571                                | New accession at propagation facilities | Killin          | 3                  | SYR     |
| ESP-046                        | 679                                 | Field accession                         | Kiraz           | 2                  | TUR     |
| ESP-046                        | 849                                 | Field accession                         | Klirou          | 2                  | CYP     |
| ESP-046                        | 1081                                | Field accession                         | Klon_14-1081    | 3                  | ALB     |

| INIA-FAO<br>collection<br>code | Register<br>Number of<br>accessions | Type of material                        | Accession name        | No<br>Trees/Plants | Origin* |
|--------------------------------|-------------------------------------|-----------------------------------------|-----------------------|--------------------|---------|
| ESP-046                        | 1812                                | Field accession                         | Klon_14-1812          | 3                  | ALB     |
| ESP-046                        | 1716                                | Field accession                         | Kokerrmadh Elbasani   | 2                  | ALB     |
| ESP-046                        | 2267                                | New accession at propagation facilities | Kokerrmadhi i Beratit | 2                  | ALB     |
| ESP-046                        | 702                                 | Field accession                         | Kolybada              | 2                  | GRC     |
| ESP-046                        | 219                                 | Field accession                         | Konservolia           | 4                  | GRC     |
| ESP-046                        | 1961                                | Field accession                         | Korakoy               | 3                  | CYP     |
| ESP-046                        | 218                                 | Field accession                         | Koroneiki             | 3                  | GRC     |
| ESP-046                        | 1480                                | Field accession                         | Koroneiki             | 3                  | GRC     |
| ESP-046                        | 1754                                | Field accession                         | Kosiem                | 1                  | EGY     |
| ESP-046                        | 1981                                | Field accession                         | Kosmača               | 2                  | HRV     |
| ESP-046                        | 1385                                | Field accession                         | Kothreiki             | 3                  | GRC     |
| ESP-046                        | 1077                                | Field accession                         | Kotruvsi              | 2                  | ALB     |
| ESP-046                        | 2227                                | New accession at propagation facilities | Koutsourelia          | 1                  | GRC     |
| ESP-046                        | 1713                                | Field accession                         | Krypsi i Krujes       | 2                  | ALB     |
| ESP-046                        | 2320                                | New accession at propagation facilities | Kucuk Topak Ulak      | 1                  | TUR     |
| ESP-046                        | 1147                                | Field accession                         | Kusha-1147            | 2                  | ALB     |
| ESP-046                        | 2270                                | New accession at propagation facilities | Kusha-2270            | 3                  | ALB     |
| ESP-046                        | 2219                                | New accession at propagation facilities | La Bechude            | 3                  | FRA     |
| ESP-046                        | 2278                                | New accession at propagation facilities | Labeed                | 2                  | IRQ     |
| ESP-046                        | 2240                                | New accession at propagation facilities | Ladoelia              | 2                  | CYP     |
| ESP-046                        | 1962                                | Field accession                         | Lagoydhera            | 1                  | CYP     |
| ESP-046                        | 1205                                | Field accession                         | Larcianese            | 2                  | ITA     |
| ESP-046                        | 704                                 | Field accession                         | Lastovka              | 3                  | HRV     |
| ESP-046                        | 1207                                | Field accession                         | Lazzera Reale         | 3                  | ITA     |
| ESP-046                        | 82                                  | Field accession                         | Leccino               | 2                  | ITA     |
| ESP-046                        | 1208                                | Field accession                         | Leccino               | 3                  | ITA     |
| ESP-046                        | 1260                                | Field accession                         | Leccino               | 2                  | ITA     |
| ESP-046                        | 1838                                | Field accession                         | Leccino               | 1                  | ITA     |
| ESP-046                        | 1209                                | Field accession                         | Leccio del Corno      | 3                  | ITA     |
| ESP-046                        | 1210                                | Field accession                         | Leccio Maremmano      | 2                  | ITA     |

| INIA-FAO<br>collection<br>code | Register<br>Number of<br>accessions | Type of material                        | Accession name      | No<br>Trees/Plants | Origin* |
|--------------------------------|-------------------------------------|-----------------------------------------|---------------------|--------------------|---------|
| ESP-046                        | 1261                                | Field accession                         | Leccio Maremmano    | 2                  | ITA     |
| ESP-046                        | 1211                                | Field accession                         | Leccione            | 2                  | ITA     |
| ESP-046                        | 54                                  | Field accession                         | Lechín de Granada   | 4                  | ESP     |
| ESP-046                        | 5                                   | Field accession                         | Lechín de Sevilla   | 4                  | ESP     |
| ESP-046                        | 139                                 | Field accession                         | Lechín de Sevilla   | 4                  | ESP     |
| ESP-046                        | 149                                 | Field accession                         | Lechín de Sevilla   | 2                  | ESP     |
| ESP-046                        | 758                                 | Field accession                         | Lemeño              | 3                  | ESP     |
| ESP-046                        | 384                                 | Field accession                         | Lentisca            | 4                  | ESP     |
| ESP-046                        | 2018                                | Field accession                         | Leucocarpa          | 2                  | ITA     |
| ESP-046                        | 703                                 | Field accession                         | Levantinka          | 2                  | HRV     |
| ESP-046                        | 108                                 | Field accession                         | Lianolia Kerkyras   | 3                  | GRC     |
| ESP-046                        | 694                                 | Field accession                         | Lianolia Kerkyras   | 2                  | GRC     |
| ESP-046                        | 1459                                | Field accession                         | Liguria             | 3                  | CHL     |
| ESP-046                        | 1537                                | Field accession                         | Limli               | 2                  | DZA     |
| ESP-046                        | 1949                                | Field accession                         | Limli               | 2                  | DZA     |
| ESP-046                        | 35                                  | Field accession                         | Limoncillo          | 4                  | ESP     |
| ESP-046                        | 2386                                | New accession at propagation facilities | Ljubuški Stari Grad | 1                  | BiH     |
| ESP-046                        | 2176                                | New accession at propagation facilities | Llimonenca          | 3                  | ESP     |
| ESP-046                        | 1369                                | Field accession                         | Lloma               | 3                  | ESP     |
| ESP-046                        | 534                                 | Field accession                         | Llorón de Atarfe    | 2                  | ESP     |
| ESP-046                        | 400                                 | Field accession                         | Llorón de Iznalloz  | 6                  | ESP     |
| ESP-046                        | 376                                 | Field accession                         | Llorón de Ronda     | 2                  | ESP     |
| ESP-046                        | 226                                 | Field accession                         | Llumeta             | 3                  | ESP     |
| ESP-046                        | 414                                 | Field accession                         | Loaime              | 4                  | ESP     |
| ESP-046                        | 1534                                | Field accession                         | Longue de Meliana   | 2                  | DZA     |
| ESP-046                        | 753                                 | Field accession                         | Lucio               | 4                  | ESP     |
| ESP-046                        | 763                                 | Field accession                         | Lucio               | 1                  | ESP     |
| ESP-046                        | 322                                 | Field accession                         | Lucques             | 6                  | FRA     |
| ESP-046                        | 1997                                | Field accession                         | Lumbardina          | 2                  | MNE     |
| ESP-046                        | 1337                                | Field accession                         | Lumiario            | 2                  | ITA     |



| INIA-FAO<br>collection<br>code | Register<br>Number of<br>accessions | Type of material                        | Accession name               | No<br>Trees/Plants | Origin* |
|--------------------------------|-------------------------------------|-----------------------------------------|------------------------------|--------------------|---------|
| ESP-046                        | 1125                                | Field accession                         | Maarri                       | 2                  | SYR     |
| ESP-046                        | 28                                  | Field accession                         | Macho de Jaén                | 2                  | ESP     |
| ESP-046                        | 448                                 | Field accession                         | Machorrón                    | 3                  | ESP     |
| ESP-046                        | 1212                                | Field accession                         | Madonna dell'Impruneta       | 3                  | ITA     |
| ESP-046                        | 130                                 | Field accession                         | Madural                      | 2                  | PRT     |
| ESP-046                        | 856                                 | Field accession                         | Maelia                       | 4                  | ISR     |
| ESP-046                        | 1010                                | Field accession                         | Mahati-1010                  | 4                  | SYR     |
| ESP-046                        | 1581                                | Field accession                         | Mahati-1581                  | 3                  | SYR     |
| ESP-046                        | 846                                 | Field accession                         | Mahati-846                   | 7                  | SYR     |
| ESP-046                        | 1262                                | Field accession                         | Maiatica di Ferrandina       | 2                  | ITA     |
| ESP-046                        | 1059                                | Field accession                         | Majhol-1059                  | 4                  | SYR     |
| ESP-046                        | 1063                                | Field accession                         | Majhol-1063                  | 3                  | SYR     |
| ESP-046                        | 1122                                | Field accession                         | Majhol-1122                  | 2                  | SYR     |
| ESP-046                        | 152                                 | Field accession                         | Majhol-152                   | 3                  | SYR     |
| ESP-046                        | 1317                                | Field accession                         | Majorca                      | 2                  | ITA     |
| ESP-046                        | 1711                                | Field accession                         | Managjel                     | 2                  | ALB     |
| ESP-046                        | 1782                                | Field accession                         | Manakiri-1782                | 3                  | SYR     |
| ESP-046                        | 1600                                | New accession at propagation facilities | Manakiri                     | 3                  | SYR     |
| ESP-046                        | 1681                                | Field accession                         | Mangar Erragma               | 2                  | TUN     |
| ESP-046                        | 1313                                | Field accession                         | Manna                        | 2                  | ITA     |
| ESP-046                        | 489                                 | Field accession                         | Manzanil de Piedra Buena-489 | 1                  | ESP     |
| ESP-046                        | 1451                                | Field accession                         | Manzanilla Aceitera          | 3                  | CHL     |
| ESP-046                        | 1504                                | Field accession                         | Manzanilla Aceitera          | 3                  | ARG     |
| ESP-046                        | 430                                 | Field accession                         | Manzanilla Cacereña          | 2                  | ESP     |
| ESP-046                        | 1460                                | Field accession                         | Manzanilla Chilena           | 2                  | CHL     |
| ESP-046                        | 770                                 | Field accession                         | Manzanilla de Abla           | 5                  | ESP     |
| ESP-046                        | 1492                                | Field accession                         | Manzanilla de Abla           | 1                  | ESP     |
| ESP-046                        | 406                                 | Field accession                         | Manzanilla de Agua           | 2                  | ESP     |
| ESP-046                        | 760                                 | Field accession                         | Manzanilla de Agua           | 2                  | ESP     |
| ESP-046                        | 772                                 | Field accession                         | Manzanilla de Agua           | 2                  | ESP     |

| INIA-FAO<br>collection<br>code | Register<br>Number of<br>accessions | Type of material                        | Accession name                | No<br>Trees/Plants | Origin* |
|--------------------------------|-------------------------------------|-----------------------------------------|-------------------------------|--------------------|---------|
| ESP-046                        | 775                                 | Field accession                         | Manzanilla de Agua            | 2                  | ESP     |
| ESP-046                        | 784                                 | Field accession                         | Manzanilla de Almería         | 2                  | ESP     |
| ESP-046                        | 971                                 | Field accession                         | Manzanilla de Ayora           | 4                  | ESP     |
| ESP-046                        | 2188                                | New accession at propagation facilities | Manzanilla de Caudiel         | 3                  | ESP     |
| ESP-046                        | 801                                 | Field accession                         | Manzanilla de Hellín          | 2                  | ESP     |
| ESP-046                        | 56                                  | Field accession                         | Manzanilla de Jaén            | 2                  | ESP     |
| ESP-046                        | 401                                 | Field accession                         | Manzanilla de Montefrío       | 7                  | ESP     |
| ESP-046                        | 2178                                | New accession at propagation facilities | Manzanilla de Requena         | 3                  | ESP     |
| ESP-046                        | 1134                                | Field accession                         | Manzanilla de San Vicente     | 2                  | MEX     |
| ESP-046                        | 21                                  | Field accession                         | Manzanilla de Sevilla         | 2                  | ESP     |
| ESP-046                        | 267                                 | Field accession                         | Manzanilla de Sevilla         | 2                  | ESP     |
| ESP-046                        | 722                                 | Field accession                         | Manzanilla de Sevilla         | 2                  | ESP     |
| ESP-046                        | 881                                 | Field accession                         | Manzanilla de Sevilla         | 2                  | ESP     |
| ESP-046                        | 1172                                | Field accession                         | Manzanilla de Sevilla         | 3                  | ESP     |
| ESP-046                        | 22                                  | Field accession                         | Manzanilla de Tortosa         | 2                  | ESP     |
| ESP-046                        | 499                                 | Field accession                         | Manzanilla del Centro         | 3                  | ESP     |
| ESP-046                        | 269                                 | Field accession                         | Manzanilla del Piquito        | 2                  | ESP     |
| ESP-046                        | 377                                 | Field accession                         | Manzanilla Picúa              | 2                  | ESP     |
| ESP-046                        | 360                                 | Field accession                         | Manzanilla Prieta             | 2                  | ESP     |
| ESP-046                        | 1129                                | Field accession                         | Manzanilla Valle las Palmeras | 2                  | MEX     |
| ESP-046                        | 757                                 | Field accession                         | Manzanillera de Huércal Overa | 3                  | ESP     |
| ESP-046                        | 1818                                | Field accession                         | Manzanillo Cordobés de Cabra  | 1                  | ESP     |
| ESP-046                        | 1742                                | Field accession                         | Maraki                        | 2                  | EGY     |
| ESP-046                        | 2292                                | New accession at propagation facilities | Marantelli                    | 3                  | TUR     |
| ESP-046                        | 1496                                | Field accession                         | Marfil                        | 1                  | ESP     |
| ESP-046                        | 1923                                | Field accession                         | Marfil                        | 3                  | ESP     |
| ESP-046                        | 1143                                | Field accession                         | Mari                          | 4                  | IRN     |
| ESP-046                        | 2266                                | New accession at propagation facilities | Marksí                        | 1                  | ALB     |
| ESP-046                        | 535                                 | Field accession                         | Marsaline                     | 8                  | TUN     |
| ESP-046                        | 1509                                | Field accession                         | Marsaline-1509                | 5                  | TUN     |

| INIA-FAO<br>collection<br>code | Register<br>Number of<br>accessions | Type of material                        | Accession name        | No<br>Trees/Plants | Origin* |
|--------------------------------|-------------------------------------|-----------------------------------------|-----------------------|--------------------|---------|
| ESP-046                        | 1684                                | Field accession                         | Marsaline-1684        | 6                  | TUN     |
| ESP-046                        | 299                                 | Field accession                         | Marteño de la Carlota | 2                  | ESP     |
| ESP-046                        | 1213                                | Field accession                         | Marzio                | 3                  | ITA     |
| ESP-046                        | 1121                                | Field accession                         | Masabi                | 4                  | SYR     |
| ESP-046                        | 1970                                | Field accession                         | Masepo                | 3                  | ISR     |
| ESP-046                        | 2069                                | New accession at propagation facilities | Masri                 | 3                  | LBN     |
| ESP-046                        | 345                                 | Field accession                         | Mastoidis             | 1                  | GRC     |
| ESP-046                        | 1388                                | Field accession                         | Mastoidis             | 2                  | GRC     |
| ESP-046                        | 2177                                | New accession at propagation facilities | Matias                | 3                  | ESP     |
| ESP-046                        | 2209                                | New accession at propagation facilities | Matolia               | 3                  | GRC     |
| ESP-046                        | 84                                  | Field accession                         | Maurino               | 2                  | ITA     |
| ESP-046                        | 1214                                | Field accession                         | Maurino               | 2                  | ITA     |
| ESP-046                        | 1263                                | Field accession                         | Maurino               | 2                  | ITA     |
| ESP-046                        | 1389                                | Field accession                         | Mavrelia              | 2                  | GRC     |
| ESP-046                        | 699                                 | Field accession                         | Mavreya               | 2                  | GRC     |
| ESP-046                        | 990                                 | Field accession                         | Mawi                  | 2                  | SYR     |
| ESP-046                        | 1013                                | Field accession                         | Mawi                  | 2                  | SYR     |
| ESP-046                        | 138                                 | Field accession                         | Mawi Stanboli         | 2                  | SYR     |
| ESP-046                        | 2236                                | New accession at propagation facilities | Megaron               | 3                  | GRC     |
| ESP-046                        | 1519                                | Field accession                         | Mekki                 | 1                  | DZA     |
| ESP-046                        | 2349                                | New accession at propagation facilities | Melkabazi             | 3                  | TUR     |
| ESP-046                        | 1891                                | Field accession                         | Mellahi Kotti         | 4                  | TUN     |
| ESP-046                        | 1747                                | Field accession                         | Meloky                | 2                  | EGY     |
| ESP-046                        | 513                                 | Field accession                         | Meloncillo            | 3                  | ESP     |
| ESP-046                        | 93                                  | Field accession                         | Memecik               | 2                  | TUR     |
| ESP-046                        | 2359                                | New accession at propagation facilities | Memeli                | 3                  | TUR     |
| ESP-046                        | 836                                 | Field accession                         | Menara                | 2                  | MAR     |
| ESP-046                        | 2224                                | New accession at propagation facilities | Menudel               | 3                  | FRA     |
| ESP-046                        | 669                                 | Field accession                         | Menya                 | 4                  | ESP     |
| ESP-046                        | 1071                                | Field accession                         | Menya                 | 3                  | ESP     |

| INIA-FAO<br>collection<br>code | Register<br>Number of<br>accessions | Type of material                        | Accession name        | No<br>Trees/Plants | Origin* |
|--------------------------------|-------------------------------------|-----------------------------------------|-----------------------|--------------------|---------|
| ESP-046                        | 120                                 | Field accession                         | Merhavia              | 2                  | ISR     |
| ESP-046                        | 115                                 | Field accession                         | Meski                 | 2                  | TUN     |
| ESP-046                        | 1554                                | Field accession                         | Meski                 | 1                  | TUN     |
| ESP-046                        | 1665                                | Field accession                         | Meski                 | 3                  | TUN     |
| ESP-046                        | 1676                                | Field accession                         | Meski                 | 1                  | TUN     |
| ESP-046                        | 1727                                | Field accession                         | Meski                 | 3                  | TUN     |
| ESP-046                        | 1866                                | Field accession                         | Meski                 | 2                  | TUN     |
| ESP-046                        | 1831                                | Field accession                         | Meski Zarzis          | 3                  | TUN     |
| ESP-046                        | 1905                                | Field accession                         | Meski Zarzis          | 2                  | TUN     |
| ESP-046                        | 1832                                | Field accession                         | Meskyet Dawla Gafsa   | 2                  | TUN     |
| ESP-046                        | 1885                                | Field accession                         | Meskyet Dawla Gafsa   | 2                  | TUN     |
| ESP-046                        | 1628                                | New accession at propagation facilities | Mesyaf_2              | 3                  | SYR     |
| ESP-046                        | 1887                                | Field accession                         | Mfartah Blettech      | 2                  | TUN     |
| ESP-046                        | 1215                                | Field accession                         | Mignolo               | 3                  | ITA     |
| ESP-046                        | 1216                                | Field accession                         | Mignolo Cerretano     | 3                  | ITA     |
| ESP-046                        | 1133                                | Field accession                         | Misión de San Vicente | 1                  | MEX     |
| ESP-046                        | 708                                 | Field accession                         | Mission Moojeski      | 2                  | USA     |
| ESP-046                        | 716                                 | Field accession                         | Mission Nieland       | 1                  | USA     |
| ESP-046                        | 1079                                | Field accession                         | Mixani                | 2                  | ALB     |
| ESP-046                        | 1872                                | Field accession                         | Mlouki Blettech       | 3                  | TUN     |
| ESP-046                        | 2040                                | Field accession                         | Mochuto               | 3                  | ESP     |
| ESP-046                        | 847                                 | Field accession                         | Mohazam Abou Satl     | 3                  | SYR     |
| ESP-046                        | 859                                 | Field accession                         | Mohazan               | 2                  | ISR     |
| ESP-046                        | 864                                 | Field accession                         | Mollar Basto          | 2                  | ESP     |
| ESP-046                        | 440                                 | Field accession                         | Mollar de Cieza       | 2                  | ESP     |
| ESP-046                        | 450                                 | Field accession                         | Mollar de Cieza       | 4                  | ESP     |
| ESP-046                        | 544                                 | Field accession                         | Mollar de Cieza       | 4                  | ESP     |
| ESP-046                        | 612                                 | Field accession                         | Mollar de Cieza       | 2                  | ESP     |
| ESP-046                        | 2231                                | New accession at propagation facilities | Moncita               | 3                  | FRA     |
| ESP-046                        | 78                                  | Field accession                         | Moraiolo              | 2                  | ITA     |

| <b>INIA-FAO<br/>collection<br/>code</b> | <b>Register<br/>Number of<br/>accessions</b> | <b>Type of material</b>                 | <b>Accession name</b> | <b>No<br/>Trees/Plants</b> | <b>Origin*</b> |
|-----------------------------------------|----------------------------------------------|-----------------------------------------|-----------------------|----------------------------|----------------|
| ESP-046                                 | 85                                           | Field accession                         | Moraiolo              | 4                          | ITA            |
| ESP-046                                 | 1217                                         | Field accession                         | Moraiolo              | 3                          | ITA            |
| ESP-046                                 | 1264                                         | Field accession                         | Moraiolo              | 2                          | ITA            |
| ESP-046                                 | 86                                           | Field accession                         | Moraiolo T. Corsini   | 2                          | ITA            |
| ESP-046                                 | 1218                                         | Field accession                         | Morcaio               | 3                          | ITA            |
| ESP-046                                 | 1220                                         | Field accession                         | Morchiaio             | 3                          | ITA            |
| ESP-046                                 | 1265                                         | Field accession                         | Morchiaio             | 2                          | ITA            |
| ESP-046                                 | 1219                                         | Field accession                         | Morchione             | 3                          | ITA            |
| ESP-046                                 | 1221                                         | Field accession                         | Morcone               | 3                          | ITA            |
| ESP-046                                 | 349                                          | Field accession                         | Morejona              | 3                          | ESP            |
| ESP-046                                 | 1340                                         | Field accession                         | Moresca               | 2                          | ITA            |
| ESP-046                                 | 17                                           | Field accession                         | Morisca               | 2                          | ESP            |
| ESP-046                                 | 740                                          | Field accession                         | Morisca de Mancor     | 2                          | ESP            |
| ESP-046                                 | 270                                          | Field accession                         | Morona                | 2                          | ESP            |
| ESP-046                                 | 368                                          | Field accession                         | Morona                | 2                          | ESP            |
| ESP-046                                 | 2198                                         | New accession at propagation facilities | Morona de Castellón   | 3                          | ESP            |
| ESP-046                                 | 2174                                         | New accession at propagation facilities | Morruda de Salinas    | 3                          | ESP            |
| ESP-046                                 | 2192                                         | New accession at propagation facilities | Morruda de Segorbe    | 1                          | ESP            |
| ESP-046                                 | 224                                          | Field accession                         | Morrut                | 5                          | ESP            |
| ESP-046                                 | 809                                          | Field accession                         | Morrut                | 3                          | ESP            |
| ESP-046                                 | 607                                          | Field accession                         | Morrut-607            | 3                          | ESP            |
| ESP-046                                 | 1588                                         | New accession at propagation facilities | Mossabi               | 3                          | SYR            |
| ESP-046                                 | 1991                                         | Field accession                         | Mrčakinja             | 3                          | HRV            |
| ESP-046                                 | 1611                                         | New accession at propagation facilities | Munkar Kak            | 3                          | SYR            |
| ESP-046                                 | 700                                          | Field accession                         | Myrtolia              | 2                          | GRC            |
| ESP-046                                 | 158                                          | Field accession                         | Nabali                | 2                          | ISR            |
| ESP-046                                 | 341                                          | Field accession                         | Nabali                | 1                          | ISR            |
| ESP-046                                 | 2260                                         | New accession at propagation facilities | Nabali Baladi         | 2                          | JOR            |
| ESP-046                                 | 2095                                         | New accession at propagation facilities | Nabali Lari           | 2                          | LBN            |
| ESP-046                                 | 2262                                         | New accession at propagation facilities | Nabali Muhasan        | 2                          | JOR            |

| INIA-FAO<br>collection<br>code | Register<br>Number of<br>accessions | Type of material                        | Accession name               | No<br>Trees/Plants | Origin* |
|--------------------------------|-------------------------------------|-----------------------------------------|------------------------------|--------------------|---------|
| ESP-046                        | 2035                                | Field accession                         | Nación                       | 3                  | ESP     |
| ESP-046                        | 1341                                | Field accession                         | Nasitana                     | 2                  | ITA     |
| ESP-046                        | 2263                                | New accession at propagation facilities | Nasouhi Jaba                 | 2                  | JOR     |
| ESP-046                        | 857                                 | Field accession                         | Nasuhi                       | 2                  | ISR     |
| ESP-046                        | 1524                                | Field accession                         | Neb Djemel                   | 2                  | DZA     |
| ESP-046                        | 1859                                | Field accession                         | Neb Tataouine                | 2                  | TUN     |
| ESP-046                        | 1902                                | Field accession                         | Neb Tataouine                | 2                  | TUN     |
| ESP-046                        | 2029                                | Field accession                         | Negral de Bierge             | 2                  | ESP     |
| ESP-046                        | 1075                                | Field accession                         | Negral de Sabinán            | 2                  | ESP     |
| ESP-046                        | 27                                  | Field accession                         | Negrillo de Arjona           | 2                  | ESP     |
| ESP-046                        | 794                                 | Field accession                         | Negrillo de Arjona           | 2                  | ESP     |
| ESP-046                        | 301                                 | Field accession                         | Negrillo de Estepa           | 2                  | ESP     |
| ESP-046                        | 411                                 | Field accession                         | Negrillo de Iznalloz         | 2                  | ESP     |
| ESP-046                        | 355                                 | Field accession                         | Negrillo de la Carlota       | 2                  | ESP     |
| ESP-046                        | 410                                 | Field accession                         | Negrillo Redondo             | 2                  | ESP     |
| ESP-046                        | 123                                 | Field accession                         | Negrinha                     | 2                  | PRT     |
| ESP-046                        | 2161                                | Field accession                         | Negro de Aguilar             | 3                  | ESP     |
| ESP-046                        | 750                                 | Field accession                         | Negro del Carpio             | 2                  | ESP     |
| ESP-046                        | 1314                                | Field accession                         | Nera di Gonnos               | 2                  | ITA     |
| ESP-046                        | 1308                                | Field accession                         | Nera di Oliena               | 5                  | ITA     |
| ESP-046                        | 2038                                | New accession at propagation facilities | Neral                        | 1                  | ESP     |
| ESP-046                        | 2253                                | New accession at propagation facilities | Neral                        | 3                  | ESP     |
| ESP-046                        | 1342                                | Field accession                         | Nerba                        | 3                  | ITA     |
| ESP-046                        | 1343                                | Field accession                         | Nerba Catanese               | 3                  | ITA     |
| ESP-046                        | 44                                  | Field accession                         | Nevadillo Blanco de Jaén     | 2                  | ESP     |
| ESP-046                        | 58                                  | Field accession                         | Nevadillo Blanco de Lucena   | 2                  | ESP     |
| ESP-046                        | 351                                 | Field accession                         | Nevadillo Blanco de Osuna    | 2                  | ESP     |
| ESP-046                        | 1132                                | Field accession                         | Nevadillo de San Vicente     | 2                  | MEX     |
| ESP-046                        | 335                                 | Field accession                         | Nevadillo de Santisteban Pto | 2                  | ESP     |
| ESP-046                        | 791                                 | Field accession                         | Nevadillo de Santisteban Pto | 2                  | ESP     |

| INIA-FAO<br>collection<br>code | Register<br>Number of<br>accessions | Type of material                        | Accession name               | No<br>Trees/Plants | Origin* |
|--------------------------------|-------------------------------------|-----------------------------------------|------------------------------|--------------------|---------|
| ESP-046                        | 37                                  | Field accession                         | Nevadillo Negro de Jaén      | 2                  | ESP     |
| ESP-046                        | 45                                  | Field accession                         | Nevadillo Negro de Jaén      | 3                  | ESP     |
| ESP-046                        | 2282                                | New accession at propagation facilities | Nevadillo Negro-2282         | 3                  | ESP     |
| ESP-046                        | 1128                                | Field accession                         | Nevadillo Valle las Palmeras | 2                  | MEX     |
| ESP-046                        | 306                                 | Field accession                         | Nevado Azul                  | 2                  | ESP     |
| ESP-046                        | 307                                 | Field accession                         | Nevado Azul                  | 2                  | ESP     |
| ESP-046                        | 305                                 | Field accession                         | Nevado Basto                 | 2                  | ESP     |
| ESP-046                        | 2165                                | New accession at propagation facilities | Nevado Basto de Zuheros      | 3                  | ESP     |
| ESP-046                        | 773                                 | Field accession                         | Nevado Rizado                | 2                  | ESP     |
| ESP-046                        | 1267                                | Field accession                         | Nocellara del Belice         | 2                  | ITA     |
| ESP-046                        | 1344                                | Field accession                         | Nocellara del Belice         | 2                  | ITA     |
| ESP-046                        | 1266                                | Field accession                         | Nocellara Etnea              | 2                  | ITA     |
| ESP-046                        | 1268                                | Field accession                         | Nocellara Messinese          | 2                  | ITA     |
| ESP-046                        | 1346                                | Field accession                         | Nocellara Messinese          | 3                  | ITA     |
| ESP-046                        | 1269                                | Field accession                         | Nociara                      | 2                  | ITA     |
| ESP-046                        | 2216                                | New accession at propagation facilities | Noirette de l'Herault        | 3                  | FRA     |
| ESP-046                        | 860                                 | Field accession                         | Novo                         | 3                  | ISR     |
| ESP-046                        | 706                                 | Field accession                         | Oblica                       | 3                  | HRV     |
| ESP-046                        | 210                                 | Field accession                         | Oblonga                      | 2                  | USA     |
| ESP-046                        | 282                                 | Field accession                         | Ocal                         | 3                  | ESP     |
| ESP-046                        | 327                                 | Field accession                         | Ocal                         | 2                  | ESP     |
| ESP-046                        | 378                                 | Field accession                         | Ocal                         | 4                  | ESP     |
| ESP-046                        | 525                                 | Field accession                         | Ocal                         | 3                  | ESP     |
| ESP-046                        | 427                                 | Field accession                         | Ocal de Alburquerque         | 2                  | ESP     |
| ESP-046                        | 25                                  | Field accession                         | Ocal-25                      | 2                  | ESP     |
| ESP-046                        | 1270                                | Field accession                         | Ogliarola del Bradano        | 2                  | ITA     |
| ESP-046                        | 1271                                | Field accession                         | Ogliarola del Vulture        | 2                  | ITA     |
| ESP-046                        | 413                                 | Field accession                         | Ojo de Liebre                | 3                  | ESP     |
| ESP-046                        | 878                                 | Field accession                         | Ojua                         | 2                  | ESP     |
| ESP-046                        | 2184                                | New accession at propagation facilities | Olaya                        | 2                  | ESP     |



| INIA-FAO<br>collection<br>code | Register<br>Number of<br>accessions | Type of material                        | Accession name                 | No<br>Trees/Plants | Origin* |
|--------------------------------|-------------------------------------|-----------------------------------------|--------------------------------|--------------------|---------|
| ESP-046                        | 1305                                | Field accession                         | Olieddu                        | 2                  | ITA     |
| ESP-046                        | 2141                                | New accession at propagation facilities | Olivar de la Marina            | 1                  | ESP     |
| ESP-046                        | 1222                                | Field accession                         | Olivastra di Populonia         | 3                  | ITA     |
| ESP-046                        | 1223                                | Field accession                         | Olivastra Seggianese           | 4                  | ITA     |
| ESP-046                        | 1844                                | Field accession                         | Oliviere                       | 4                  | FRA     |
| ESP-046                        | 1272                                | Field accession                         | Olivo da Mensa                 | 2                  | ITA     |
| ESP-046                        | 1973                                | Field accession                         | Olivo de Aguamarga             | 1                  | ESP     |
| ESP-046                        | 2160                                | New accession at propagation facilities | Olivo de Galicia               | 3                  | ESP     |
| ESP-046                        | 797                                 | Field accession                         | Olivo de Mancha Real           | 3                  | ESP     |
| ESP-046                        | 309                                 | Field accession                         | Olivo de Maura                 | 2                  | ESP     |
| ESP-046                        | 2151                                | New accession at propagation facilities | Olivo de Nueva Carteya         | 3                  | ESP     |
| ESP-046                        | 1224                                | Field accession                         | Olivo del Mulino               | 3                  | ITA     |
| ESP-046                        | 1225                                | Field accession                         | Olivo di Casavecchia           | 3                  | ITA     |
| ESP-046                        | 1347                                | Field accession                         | Olivo di Castiglione           | 2                  | ITA     |
| ESP-046                        | 1348                                | Field accession                         | Olivo di Mandanici             | 2                  | ITA     |
| ESP-046                        | 1226                                | Field accession                         | Olivo di San Lorenzo           | 3                  | ITA     |
| ESP-046                        | 338                                 | Field accession                         | Olivo Macho de Santisteban Pto | 3                  | ESP     |
| ESP-046                        | 2250                                | New accession at propagation facilities | Olivonero de Ayerbe            | 2                  | ESP     |
| ESP-046                        | 2144                                | New accession at propagation facilities | Olivos de Cotillas             | 3                  | ESP     |
| ESP-046                        | 2148                                | New accession at propagation facilities | Olivos de El Barranco del Lobo | 3                  | ESP     |
| ESP-046                        | 1622                                | New accession at propagation facilities | Om Kanane                      | 2                  | SYR     |
| ESP-046                        | 1227                                | Field accession                         | Ornellaia                      | 3                  | ITA     |
| ESP-046                        | 1930                                | Field accession                         | OT2                            | 2                  | MAR     |
| ESP-046                        | 2197                                | New accession at propagation facilities | Otos_1                         | 3                  | ESP     |
| ESP-046                        | 1735                                | Field accession                         | Oueslati T-1735                | 2                  | TUN     |
| ESP-046                        | 1919                                | Field accession                         | Oueslati T-1919                | 2                  | TUN     |
| ESP-046                        | 114                                 | Field accession                         | Ouslati                        | 2                  | TUN     |
| ESP-046                        | 1931                                | Field accession                         | OZ1                            | 3                  | MAR     |
| ESP-046                        | 2390                                | New accession at propagation facilities | Pačica                         | 1                  | HRV     |
| ESP-046                        | 771                                 | Field accession                         | Pajarera                       | 2                  | ESP     |

| INIA-FAO<br>collection<br>code | Register<br>Number of<br>accessions | Type of material                        | Accession name          | No<br>Trees/Plants | Origin* |
|--------------------------------|-------------------------------------|-----------------------------------------|-------------------------|--------------------|---------|
| ESP-046                        | 26                                  | Field accession                         | Pajarero                | 2                  | ESP     |
| ESP-046                        | 1484                                | Field accession                         | Pajarero                | 3                  | ESP     |
| ESP-046                        | 1307                                | Field accession                         | Palma                   | 2                  | ITA     |
| ESP-046                        | 1273                                | Field accession                         | Palmarola               | 2                  | ITA     |
| ESP-046                        | 661                                 | Field accession                         | Palomar                 | 2                  | ESP     |
| ESP-046                        | 369                                 | Field accession                         | Palomillo               | 2                  | ESP     |
| ESP-046                        | 2244                                | New accession at propagation facilities | Panseñera               | 1                  | ESP     |
| ESP-046                        | 2220                                | New accession at propagation facilities | Pardiguier              | 3                  | FRA     |
| ESP-046                        | 1309                                | Field accession                         | Paschixedda             | 3                  | ITA     |
| ESP-046                        | 2193                                | New accession at propagation facilities | Pascual_1               | 2                  | ESP     |
| ESP-046                        | 1349                                | Field accession                         | Passulunara             | 2                  | ITA     |
| ESP-046                        | 1445                                | Field accession                         | Patrón de Cabús         | 1                  | ESP     |
| ESP-046                        | 649                                 | Field accession                         | Patronet                | 2                  | ESP     |
| ESP-046                        | 272                                 | Field accession                         | Pavo                    | 2                  | ESP     |
| ESP-046                        | 1462                                | Field accession                         | Pavo                    | 1                  | ESP     |
| ESP-046                        | 421                                 | Field accession                         | Pecoso                  | 4                  | ESP     |
| ESP-046                        | 87                                  | Field accession                         | Pendolino               | 4                  | ITA     |
| ESP-046                        | 1274                                | Field accession                         | Pendolino               | 2                  | ITA     |
| ESP-046                        | 1136                                | Field accession                         | Pendolino-1136          | 3                  | PER     |
| ESP-046                        | 1228                                | Field accession                         | Pendolino-1228          | 3                  | ITA     |
| ESP-046                        | 1442                                | Field accession                         | Penjoll                 | 2                  | ESP     |
| ESP-046                        | 562                                 | Field accession                         | Pequeña de Casas Ibáñez | 4                  | ESP     |
| ESP-046                        | 1073                                | Field accession                         | Perafort                | 2                  | ESP     |
| ESP-046                        | 1229                                | Field accession                         | Pesciatino              | 3                  | ITA     |
| ESP-046                        | 2217                                | New accession at propagation facilities | Petit Ribier            | 3                  | FRA     |
| ESP-046                        | 1230                                | Field accession                         | Piangente               | 3                  | ITA     |
| ESP-046                        | 1505                                | Field accession                         | Piangente               | 2                  | ARG     |
| ESP-046                        | 70                                  | Field accession                         | Picholine               | 2                  | FRA     |
| ESP-046                        | 1275                                | Field accession                         | Picholine               | 2                  | FRA     |
| ESP-046                        | 1471                                | Field accession                         | Picholine               | 5                  | FRA     |

| INIA-FAO<br>collection<br>code | Register<br>Number of<br>accessions | Type of material                        | Accession name          | No<br>Trees/Plants | Origin* |
|--------------------------------|-------------------------------------|-----------------------------------------|-------------------------|--------------------|---------|
| ESP-046                        | 101                                 | Field accession                         | Picholine Marocaine     | 4                  | MAR     |
| ESP-046                        | 1091                                | Field accession                         | Picholine-1091          | 2                  | FRA     |
| ESP-046                        | 273                                 | Field accession                         | Pico Limón              | 2                  | ESP     |
| ESP-046                        | 529                                 | Field accession                         | Pico Limón              | 4                  | ESP     |
| ESP-046                        | 371                                 | Field accession                         | Pico Limón de Grazalema | 4                  | ESP     |
| ESP-046                        | 2136                                | New accession at propagation facilities | Picoso                  | 3                  | ESP     |
| ESP-046                        | 9                                   | Field accession                         | Picual                  | 6                  | ESP     |
| ESP-046                        | 287                                 | Field accession                         | Picual                  | 2                  | ESP     |
| ESP-046                        | 662                                 | Field accession                         | Picual                  | 2                  | ESP     |
| ESP-046                        | 808                                 | Field accession                         | Picual                  | 3                  | ESP     |
| ESP-046                        | 1470                                | Field accession                         | Picual                  | 5                  | ESP     |
| ESP-046                        | 798                                 | Field accession                         | Picual de Almería       | 2                  | ESP     |
| ESP-046                        | 354                                 | Field accession                         | Picual de Estepa        | 2                  | ESP     |
| ESP-046                        | 312                                 | Field accession                         | Picual de Hoja Clara    | 1                  | ESP     |
| ESP-046                        | 313                                 | Field accession                         | Picual de Hoja Oscura   | 1                  | ESP     |
| ESP-046                        | 2185                                | New accession at propagation facilities | Picuda de Luis          | 3                  | ESP     |
| ESP-046                        | 3                                   | Field accession                         | Picudo                  | 2                  | ESP     |
| ESP-046                        | 276                                 | Field accession                         | Picudo Blanco de Estepa | 1                  | ESP     |
| ESP-046                        | 316                                 | Field accession                         | Picudo de Fruto Rojo    | 2                  | ESP     |
| ESP-046                        | 2201                                | New accession at propagation facilities | Picudo de la Axarquía   | 2                  | ESP     |
| ESP-046                        | 2156                                | New accession at propagation facilities | Picudo de la Rioja      | 2                  | ESP     |
| ESP-046                        | 2251                                | New accession at propagation facilities | Picudo de Labata        | 3                  | ESP     |
| ESP-046                        | 748                                 | Field accession                         | Picudo de Montoro       | 4                  | ESP     |
| ESP-046                        | 1350                                | Field accession                         | Pidicuddara             | 2                  | ITA     |
| ESP-046                        | 2247                                | New accession at propagation facilities | Piga                    | 3                  | ESP     |
| ESP-046                        | 1392                                | Field accession                         | Pikrolia                | 3                  | GRC     |
| ESP-046                        | 969                                 | Field accession                         | Piñonera                | 2                  | ESP     |
| ESP-046                        | 1322                                | Field accession                         | Pizz'e Carroga          | 3                  | ITA     |
| ESP-046                        | 1351                                | Field accession                         | Pizzo di Corvo          | 2                  | ITA     |
| ESP-046                        | 705                                 | Field accession                         | Plementa Bjelica        | 5                  | HRV     |

| INIA-FAO<br>collection<br>code | Register<br>Number of<br>accessions | Type of material                        | Accession name          | No<br>Trees/Plants | Origin* |
|--------------------------------|-------------------------------------|-----------------------------------------|-------------------------|--------------------|---------|
| ESP-046                        | 1967                                | Field accession                         | PM-M16                  | 1                  | MAR     |
| ESP-046                        | 1968                                | Field accession                         | PM-S8                   | 3                  | MAR     |
| ESP-046                        | 1130                                | Field accession                         | Polinizador             | 2                  | MEX     |
| ESP-046                        | 1085                                | Field accession                         | Pulazeqin               | 2                  | ALB     |
| ESP-046                        | 1231                                | Field accession                         | Punteruolo              | 3                  | ITA     |
| ESP-046                        | 1232                                | Field accession                         | Puntino                 | 3                  | ITA     |
| ESP-046                        | 1974                                | Field accession                         | Puntoža                 | 3                  | HRV     |
| ESP-046                        | 2187                                | New accession at propagation facilities | Queixal de Porc         | 3                  | ESP     |
| ESP-046                        | 693                                 | Field accession                         | Rachati                 | 4                  | GRC     |
| ESP-046                        | 1393                                | Field accession                         | Rachati I.Y.E.X         | 3                  | GRC     |
| ESP-046                        | 418                                 | Field accession                         | Racimal                 | 6                  | ESP     |
| ESP-046                        | 34                                  | Field accession                         | Racimal de Jaén         | 2                  | ESP     |
| ESP-046                        | 2195                                | New accession at propagation facilities | Racimo                  | 3                  | ESP     |
| ESP-046                        | 2032                                | Field accession                         | Rañinera                | 3                  | ESP     |
| ESP-046                        | 277                                 | Field accession                         | Rapasayo                | 2                  | ESP     |
| ESP-046                        | 1799                                | Field accession                         | Rasei                   | 3                  | JOR     |
| ESP-046                        | 1276                                | Field accession                         | Ravece                  | 2                  | ITA     |
| ESP-046                        | 1233                                | Field accession                         | Razzaio                 | 2                  | ITA     |
| ESP-046                        | 1234                                | Field accession                         | Razzo                   | 3                  | ITA     |
| ESP-046                        | 177                                 | Field accession                         | Razzola                 | 4                  | ITA     |
| ESP-046                        | 49                                  | Field accession                         | Real Sevillana          | 2                  | ESP     |
| ESP-046                        | 372                                 | Field accession                         | Rechino                 | 3                  | ESP     |
| ESP-046                        | 127                                 | Field accession                         | Redondil                | 2                  | PRT     |
| ESP-046                        | 876                                 | Field accession                         | Redondil                | 3                  | ESP     |
| ESP-046                        | 365                                 | Field accession                         | Redondilla de Grazalema | 2                  | ESP     |
| ESP-046                        | 16                                  | Field accession                         | Redondilla de Logroño   | 4                  | ESP     |
| ESP-046                        | 1161                                | Field accession                         | Redondilla de Logroño   | 1                  | ESP     |
| ESP-046                        | 966                                 | Field accession                         | Reixonenca              | 2                  | ESP     |
| ESP-046                        | 1762                                | Field accession                         | Remmani-1762            | 4                  | LBN     |
| ESP-046                        | 2081                                | New accession at propagation facilities | Remmani-2081            | 3                  | LBN     |

| INIA-FAO<br>collection<br>code | Register<br>Number of<br>accessions | Type of material                        | Accession name           | No<br>Trees/Plants | Origin* |
|--------------------------------|-------------------------------------|-----------------------------------------|--------------------------|--------------------|---------|
| ESP-046                        | 2388                                | New accession at propagation facilities | Resulja                  | 1                  | HRV     |
| ESP-046                        | 1671                                | Field accession                         | R'Khami                  | 1                  | TUN     |
| ESP-046                        | 1864                                | Field accession                         | R'Khami                  | 4                  | TUN     |
| ESP-046                        | 2024                                | Field accession                         | Roalejo                  | 2                  | ESP     |
| ESP-046                        | 2173                                | New accession at propagation facilities | Rogeta de Gorga_1        | 3                  | ESP     |
| ESP-046                        | 1448                                | Field accession                         | Rojal                    | 2                  | ESP     |
| ESP-046                        | 2183                                | New accession at propagation facilities | Rojal de Valencia        | 3                  | ESP     |
| ESP-046                        | 1944                                | Field accession                         | Ronde de la Ménara       | 3                  | MAR     |
| ESP-046                        | 1533                                | Field accession                         | Ronde de Meliana         | 2                  | DZA     |
| ESP-046                        | 1809                                | Field accession                         | Rosai-1809               | 4                  | JOR     |
| ESP-046                        | 2254                                | New accession at propagation facilities | Rosai-2254               | 3                  | JOR     |
| ESP-046                        | 88                                  | Field accession                         | Rosciola                 | 4                  | ITA     |
| ESP-046                        | 1235                                | Field accession                         | Rosino                   | 2                  | ITA     |
| ESP-046                        | 1236                                | Field accession                         | Rossellino               | 1                  | ITA     |
| ESP-046                        | 1237                                | Field accession                         | Rossello                 | 2                  | ITA     |
| ESP-046                        | 1977                                | Field accession                         | Rosulja                  | 3                  | HRV     |
| ESP-046                        | 1277                                | Field accession                         | Rotondella               | 2                  | ITA     |
| ESP-046                        | 2204                                | New accession at propagation facilities | Rougette de l'Ardèche    | 3                  | FRA     |
| ESP-046                        | 1536                                | Field accession                         | Rougette de Metidja      | 1                  | DZA     |
| ESP-046                        | 2500                                | Field accession                         | Rougette de Metidja-2500 | 1                  | DZA     |
| ESP-046                        | 2215                                | New accession at propagation facilities | Rougette de Pignans      | 3                  | FRA     |
| ESP-046                        | 1770                                | Field accession                         | Roumani (Qana)           | 2                  | LBN     |
| ESP-046                        | 1139                                | Field accession                         | Rowghani                 | 6                  | IRN     |
| ESP-046                        | 1182                                | Field accession                         | Royal                    | 3                  | ESP     |
| ESP-046                        | 1186                                | Field accession                         | Royal de Belchite        | 3                  | ESP     |
| ESP-046                        | 965                                 | Field accession                         | Royal de Calatayud       | 2                  | ESP     |
| ESP-046                        | 47                                  | Field accession                         | Royal de Calatayud-47    | 2                  | ESP     |
| ESP-046                        | 390                                 | Field accession                         | Royal de Cazorla         | 3                  | ESP     |
| ESP-046                        | 962                                 | Field accession                         | Royal de Sabiñán         | 2                  | ESP     |
| ESP-046                        | 806                                 | Field accession                         | Royal de Villena         | 4                  | ESP     |

| INIA-FAO<br>collection<br>code | Register<br>Number of<br>accessions | Type of material                        | Accession name            | No<br>Trees/Plants | Origin* |
|--------------------------------|-------------------------------------|-----------------------------------------|---------------------------|--------------------|---------|
| ESP-046                        | 2252                                | New accession at propagation facilities | Royeta de Abizanda        | 3                  | ESP     |
| ESP-046                        | 2030                                | Field accession                         | Royeta de Asque           | 2                  | ESP     |
| ESP-046                        | 2159                                | Field accession                         | Royuela                   | 3                  | ESP     |
| ESP-046                        | 2182                                | New accession at propagation facilities | Rufina                    | 3                  | ESP     |
| ESP-046                        | 717                                 | Field accession                         | S. George Greys           | 4                  | USA     |
| ESP-046                        | 2047                                | New accession at propagation facilities | S:27_4                    | 3                  | PER     |
| ESP-046                        | 665                                 | Field accession                         | Sabatera                  | 3                  | ESP     |
| ESP-046                        | 2070                                | New accession at propagation facilities | Sabbighi                  | 3                  | LBN     |
| ESP-046                        | 2297                                | New accession at propagation facilities | Sacakli otur              | 3                  | TUR     |
| ESP-046                        | 142                                 | Field accession                         | Safrawi                   | 2                  | SYR     |
| ESP-046                        | 1112                                | Field accession                         | Safrawi                   | 4                  | SYR     |
| ESP-046                        | 1117                                | Field accession                         | Safrawi                   | 1                  | SYR     |
| ESP-046                        | 1116                                | Field accession                         | Safrawi-1116              | 2                  | SYR     |
| ESP-046                        | 1574                                | Field accession                         | Safrawi-1574              | 2                  | SYR     |
| ESP-046                        | 1562                                | Field accession                         | Saifi                     | 3                  | SYR     |
| ESP-046                        | 348                                 | Field accession                         | Salgar Redondo            | 2                  | ESP     |
| ESP-046                        | 1241                                | Field accession                         | Salicino                  | 2                  | ITA     |
| ESP-046                        | 73                                  | Field accession                         | Salonenque                | 2                  | FRA     |
| ESP-046                        | 2315                                | New accession at propagation facilities | Sam (Iznik)               | 3                  | TUR     |
| ESP-046                        | 2316                                | New accession at propagation facilities | Samanli                   | 3                  | TUR     |
| ESP-046                        | 2294                                | New accession at propagation facilities | Samsun Kirmizi Tuzlamalik | 1                  | TUR     |
| ESP-046                        | 2306                                | New accession at propagation facilities | Samsun Salamuralik        | 3                  | TUR     |
| ESP-046                        | 2351                                | New accession at propagation facilities | Samsun Tuzlamalik         | 3                  | TUR     |
| ESP-046                        | 684                                 | Field accession                         | Samsun Ufak Tuzlamalik    | 4                  | TUR     |
| ESP-046                        | 2301                                | New accession at propagation facilities | Samsun Ufak Tuzlamalik    | 1                  | TUR     |
| ESP-046                        | 2290                                | New accession at propagation facilities | Samsun Yaglik             | 3                  | TUR     |
| ESP-046                        | 997                                 | Field accession                         | San Pedro                 | 2                  | CHL     |
| ESP-046                        | 956                                 | Field accession                         | Sandalio                  | 2                  | ESP     |
| ESP-046                        | 71                                  | Field accession                         | Sant' Agostino            | 2                  | ITA     |
| ESP-046                        | 1278                                | Field accession                         | Sant' Agostino            | 2                  | ITA     |

| INIA-FAO<br>collection<br>code | Register<br>Number of<br>accessions | Type of material                        | Accession name      | No<br>Trees/Plants | Origin* |
|--------------------------------|-------------------------------------|-----------------------------------------|---------------------|--------------------|---------|
| ESP-046                        | 1239                                | Field accession                         | San Francesco       | 2                  | ITA     |
| ESP-046                        | 1279                                | Field accession                         | San Francesco-1279  | 2                  | ITA     |
| ESP-046                        | 1240                                | Field accession                         | San Lazzero         | 2                  | ITA     |
| ESP-046                        | 72                                  | Field accession                         | Santa Caterina      | 1                  | ITA     |
| ESP-046                        | 1238                                | Field accession                         | Santa Caterina      | 2                  | ITA     |
| ESP-046                        | 1280                                | Field accession                         | Santa Martinenga    | 2                  | ITA     |
| ESP-046                        | 2323                                | New accession at propagation facilities | Sari Habesi (Hatay) | 1                  | TUR     |
| ESP-046                        | 2319                                | New accession at propagation facilities | Sari Ulak           | 3                  | TUR     |
| ESP-046                        | 1306                                | Field accession                         | Sassarese           | 3                  | ITA     |
| ESP-046                        | 2300                                | New accession at propagation facilities | Sati                | 3                  | TUR     |
| ESP-046                        | 2324                                | New accession at propagation facilities | Saurani             | 1                  | TUR     |
| ESP-046                        | 2218                                | New accession at propagation facilities | Sauzin Vert         | 3                  | FRA     |
| ESP-046                        | 1670                                | Field accession                         | Sayali              | 3                  | TUN     |
| ESP-046                        | 1677                                | Field accession                         | Sayali T-1677       | 3                  | TUN     |
| ESP-046                        | 1728                                | Field accession                         | Sayali T-1728       | 2                  | TUN     |
| ESP-046                        | 1875                                | Field accession                         | Sayali T-1875       | 3                  | TUN     |
| ESP-046                        | 1863                                | Field accession                         | Sayali-1863         | 3                  | TUN     |
| ESP-046                        | 1056                                | Field accession                         | Sayfi               | 2                  | SYR     |
| ESP-046                        | 2325                                | New accession at propagation facilities | Sayfi-2325          | 1                  | TUR     |
| ESP-046                        | 1749                                | Field accession                         | Sebhawy             | 1                  | EGY     |
| ESP-046                        | 893                                 | Field accession                         | Selvatico           | 1                  | ITA     |
| ESP-046                        | 1323                                | Field accession                         | Semidana            | 2                  | ITA     |
| ESP-046                        | 1876                                | Field accession                         | Semni Djebeniana    | 2                  | TUN     |
| ESP-046                        | 2169                                | New accession at propagation facilities | Sennara             | 2                  | EGY     |
| ESP-046                        | 1971                                | Field accession                         | Sepoka              | 3                  | ISR     |
| ESP-046                        | 2179                                | New accession at propagation facilities | Sepriana            | 2                  | ESP     |
| ESP-046                        | 1483                                | Field accession                         | Sevillana           | 3                  | ESP     |
| ESP-046                        | 1452                                | Field accession                         | Sevillana (Azapa)   | 3                  | CHL     |
| ESP-046                        | 1454                                | Field accession                         | Sevillana (Tacna)   | 2                  | CHL     |
| ESP-046                        | 768                                 | Field accession                         | Sevillana de Abila  | 2                  | ESP     |



| INIA-FAO<br>collection<br>code | Register<br>Number of<br>accessions | Type of material                        | Accession name               | No<br>Trees/Plants | Origin* |
|--------------------------------|-------------------------------------|-----------------------------------------|------------------------------|--------------------|---------|
| ESP-046                        | 593                                 | Field accession                         | Sevillano de Jumilla         | 1                  | ESP     |
| ESP-046                        | 227                                 | Field accession                         | Sevillenca                   | 2                  | ESP     |
| ESP-046                        | 608                                 | Field accession                         | Sevillenca                   | 2                  | ESP     |
| ESP-046                        | 1786                                | Field accession                         | Shame                        | 4                  | SYR     |
| ESP-046                        | 1620                                | New accession at propagation facilities | Shame-1620                   | 3                  | SYR     |
| ESP-046                        | 1568                                | Field accession                         | Shami Modabl                 | 3                  | SYR     |
| ESP-046                        | 1041                                | Field accession                         | Shami-1041                   | 1                  | SYR     |
| ESP-046                        | 141                                 | Field accession                         | Shami-141                    | 2                  | SYR     |
| ESP-046                        | 2259                                | New accession at propagation facilities | Shami-2259                   | 2                  | JOR     |
| ESP-046                        | 953                                 | Field accession                         | Shami-953                    | 2                  | SYR     |
| ESP-046                        | 1142                                | Field accession                         | Shengeh Manjil               | 2                  | IRN     |
| ESP-046                        | 1855                                | Field accession                         | Shengeh Manjil               | 2                  | IRN     |
| ESP-046                        | 1856                                | Field accession                         | Shengeh Sur                  | 2                  | IRN     |
| ESP-046                        | 119                                 | Field accession                         | Sigoise                      | 4                  | DZA     |
| ESP-046                        | 1515                                | Field accession                         | Sigoise                      | 4                  | DZA     |
| ESP-046                        | 1979                                | Field accession                         | Simjaca                      | 1                  | HRV     |
| ESP-046                        | 1750                                | Field accession                         | Sinawy                       | 1                  | EGY     |
| ESP-046                        | 685                                 | Field accession                         | Sinop                        | 5                  | TUR     |
| ESP-046                        | 2305                                | New accession at propagation facilities | Sinop no 1                   | 1                  | TUR     |
| ESP-046                        | 2299                                | New accession at propagation facilities | Sinop no 2                   | 1                  | TUR     |
| ESP-046                        | 2298                                | New accession at propagation facilities | Sinop no 5                   | 3                  | TUR     |
| ESP-046                        | 2304                                | New accession at propagation facilities | Sinop no 6                   | 3                  | TUR     |
| ESP-046                        | 1993                                | Field accession                         | Sitncica                     | 3                  | MNE     |
| ESP-046                        | 1989                                | Field accession                         | Sitnica                      | 3                  | HRV     |
| ESP-046                        | 1318                                | Field accession                         | Sivigliana da Mensa          | 2                  | ITA     |
| ESP-046                        | 1304                                | Field accession                         | Sivigliana da Olio           | 2                  | ITA     |
| ESP-046                        | 2167                                | Field accession                         | Siwi                         | 2                  | EGY     |
| ESP-046                        | 2303                                | New accession at propagation facilities | Siyah Salamuralik (Tekirdag) | 1                  | TUR     |
| ESP-046                        | 2237                                | New accession at propagation facilities | Smertolia                    | 3                  | GRC     |
| ESP-046                        | 1925                                | Field accession                         | Solimar                      | 3                  | ESP     |

| INIA-FAO<br>collection<br>code | Register<br>Number of<br>accessions | Type of material                        | Accession name        | No<br>Trees/Plants | Origin* |
|--------------------------------|-------------------------------------|-----------------------------------------|-----------------------|--------------------|---------|
| ESP-046                        | 871                                 | Field accession                         | Sollana               | 2                  | ESP     |
| ESP-046                        | 787                                 | Field accession                         | Sorani                | 3                  | SYR     |
| ESP-046                        | 1566                                | New accession at propagation facilities | Sorani-1566           | 2                  | SYR     |
| ESP-046                        | 1918                                | Field accession                         | Souabaa Aljia         | 3                  | TUN     |
| ESP-046                        | 1513                                | Field accession                         | Souidi                | 1                  | DZA     |
| ESP-046                        | 1478                                | Field accession                         | Sourani-1478          | 2                  | SYR     |
| ESP-046                        | 1165                                | Field accession                         | Souri                 | 3                  | ISR     |
| ESP-046                        | 1589                                | New accession at propagation facilities | Souri-1589            | 3                  | SYR     |
| ESP-046                        | 1843                                | Field accession                         | Souri-1843            | 4                  | ISR     |
| ESP-046                        | 1766                                | Field accession                         | Soury Lari            | 3                  | LBN     |
| ESP-046                        | 991                                 | Field accession                         | Stanboli-991          | 2                  | SYR     |
| ESP-046                        | 1590                                | Field accession                         | Stanbouli             | 3                  | SYR     |
| ESP-046                        | 1999                                | New accession at propagation facilities | Stara Maslina-1999    | 1                  | MNE     |
| ESP-046                        | 2005                                | Field accession                         | Stara Maslina-2005    | 3                  | HRV     |
| ESP-046                        | 2273                                | New accession at propagation facilities | Štorta                | 3                  | SVN     |
| ESP-046                        | 2385                                | New accession at propagation facilities | Studenci              | 1                  | BiH     |
| ESP-046                        | 996                                 | Field accession                         | Suca                  | 2                  | CHL     |
| ESP-046                        | 1790                                | Field accession                         | Sukare                | 4                  | SYR     |
| ESP-046                        | 2394                                | New accession at propagation facilities | Tachuno               | 3                  | ESP     |
| ESP-046                        | 1947                                | Field accession                         | Takesrit              | 2                  | DZA     |
| ESP-046                        | 2058                                | Field accession                         | Tarabelsi             | 3                  | SYR     |
| ESP-046                        | 2369                                | New accession at propagation facilities | Tasarasi (Aydin)      | 2                  | TUR     |
| ESP-046                        | 2370                                | New accession at propagation facilities | Tasarasi (Kusadasi)   | 1                  | TUR     |
| ESP-046                        | 1794                                | Field accession                         | Tebabs                | 4                  | SYR     |
| ESP-046                        | 1777                                | Field accession                         | Tebabs                | 2                  | SYR     |
| ESP-046                        | 1539                                | Field accession                         | Tefah                 | 2                  | DZA     |
| ESP-046                        | 2308                                | New accession at propagation facilities | Tekirdag cizmelik     | 2                  | TUR     |
| ESP-046                        | 2175                                | New accession at propagation facilities | Temprana de Montán    | 3                  | ESP     |
| ESP-046                        | 2191                                | New accession at propagation facilities | Tempranillo de Ayora  | 3                  | ESP     |
| ESP-046                        | 756                                 | Field accession                         | Tempranillo de Lucena | 2                  | ESP     |

| INIA-FAO<br>collection<br>code | Register<br>Number of<br>accessions | Type of material                        | Accession name        | No<br>Trees/Plants | Origin* |
|--------------------------------|-------------------------------------|-----------------------------------------|-----------------------|--------------------|---------|
| ESP-046                        | 1160                                | Field accession                         | Tempranillo de Lucena | 1                  | ESP     |
| ESP-046                        | 1486                                | Field accession                         | Tempranillo de Lucena | 3                  | ESP     |
| ESP-046                        | 561                                 | Field accession                         | Tempranillo de Yeste  | 3                  | ESP     |
| ESP-046                        | 358                                 | Field accession                         | Temprano              | 1                  | ESP     |
| ESP-046                        | 2362                                | New accession at propagation facilities | Ters Yaprak           | 2                  | TUR     |
| ESP-046                        | 1310                                | Field accession                         | Terza Grande          | 2                  | ITA     |
| ESP-046                        | 1311                                | Field accession                         | Terza Piccola         | 3                  | ITA     |
| ESP-046                        | 2339                                | New accession at propagation facilities | Tesbih Celebi         | 1                  | TUR     |
| ESP-046                        | 2100                                | New accession at propagation facilities | Teta de la Vaca       | 1                  | ESP     |
| ESP-046                        | 2239                                | New accession at propagation facilities | Thassitiki            | 3                  | GRC     |
| ESP-046                        | 1394                                | Field accession                         | Thiaki                | 3                  | GRC     |
| ESP-046                        | 2211                                | New accession at propagation facilities | Throubolia            | 1                  | GRC     |
| ESP-046                        | 2194                                | New accession at propagation facilities | Tío Blas              | 3                  | ESP     |
| ESP-046                        | 721                                 | Field accession                         | Toffahi               | 4                  | EGY     |
| ESP-046                        | 1743                                | Field accession                         | Toffahi               | 1                  | EGY     |
| ESP-046                        | 2056                                | Field accession                         | Toffahi               | 1                  | EGY     |
| ESP-046                        | 1000                                | Field accession                         | Toffahi-1000          | 2                  | SYR     |
| ESP-046                        | 1508                                | Field accession                         | Toffehi Tataouine     | 1                  | TUN     |
| ESP-046                        | 1683                                | Field accession                         | Toffehi Tataouine     | 3                  | TUN     |
| ESP-046                        | 1729                                | Field accession                         | Toffehi Tataouine     | 1                  | TUN     |
| ESP-046                        | 1903                                | Field accession                         | Toffehi Tataouine     | 2                  | TUN     |
| ESP-046                        | 2052                                | New accession at propagation facilities | Tomatillo             | 2                  | ESP     |
| ESP-046                        | 1315                                | Field accession                         | Tonda di Cagliari     | 3                  | ITA     |
| ESP-046                        | 1312                                | Field accession                         | Tonda di Villacidro   | 3                  | ITA     |
| ESP-046                        | 1352                                | Field accession                         | Tonda Iblea           | 4                  | ITA     |
| ESP-046                        | 1242                                | Field accession                         | Tondello              | 2                  | ITA     |
| ESP-046                        | 2162                                | New accession at propagation facilities | Torcío                | 3                  | ESP     |
| ESP-046                        | 767                                 | Field accession                         | Torcío de Cabra       | 2                  | ESP     |
| ESP-046                        | 357                                 | Field accession                         | Torcío de Huelma      | 3                  | ESP     |
| ESP-046                        | 774                                 | Field accession                         | Toruno                | 2                  | ESP     |

| INIA-FAO<br>collection<br>code | Register<br>Number of<br>accessions | Type of material                        | Accession name                 | No<br>Trees/Plants | Origin* |
|--------------------------------|-------------------------------------|-----------------------------------------|--------------------------------|--------------------|---------|
| ESP-046                        | 1629                                | Field accession                         | Tounsi Gafsa                   | 1                  | TUN     |
| ESP-046                        | 1674                                | Field accession                         | Tounsi Gafsa                   | 2                  | TUN     |
| ESP-046                        | 1883                                | Field accession                         | Tounsi Gafsa                   | 4                  | TUN     |
| ESP-046                        | 2212                                | New accession at propagation facilities | Tragolia                       | 3                  | GRC     |
| ESP-046                        | 992                                 | Field accession                         | Trylia                         | 3                  | SYR     |
| ESP-046                        | 1617                                | New accession at propagation facilities | Tufahi Tadmori                 | 3                  | SYR     |
| ESP-046                        | 2232                                | New accession at propagation facilities | Ubac                           | 3                  | FRA     |
| ESP-046                        | 1149                                | Field accession                         | Ulliri i Bardhe Berat          | 2                  | ALB     |
| ESP-046                        | 1082                                | Field accession                         | Ulliri i Bardhe i Tiranes      | 1                  | ALB     |
| ESP-046                        | 2499                                | Field accession                         | Ulliri i Bardhe i Tiranes-2499 | 1                  | ALB     |
| ESP-046                        | 1715                                | Field accession                         | Ulliri i Bardhe Kruje          | 2                  | ALB     |
| ESP-046                        | 1083                                | Field accession                         | Ulliri i Holle i Himares       | 2                  | ALB     |
| ESP-046                        | 1078                                | Field accession                         | Ulliri i Kuq                   | 2                  | ALB     |
| ESP-046                        | 2384                                | New accession at propagation facilities | Ulliri i Zi                    | 1                  | ALB     |
| ESP-046                        | 2268                                | New accession at propagation facilities | Ulliri Shekullor Berat         | 3                  | ALB     |
| ESP-046                        | 1714                                | Field accession                         | Unafka                         | 2                  | ALB     |
| ESP-046                        | 110                                 | Field accession                         | Unknown                        | 2                  | PAK     |
| ESP-046                        | 75                                  | Field accession                         | Uovo di Piccione               | 2                  | ITA     |
| ESP-046                        | 1282                                | Field accession                         | Uovo di Piccione               | 2                  | ITA     |
| ESP-046                        | 1464                                | Field accession                         | Uovo di Piccione               | 3                  | ITA     |
| ESP-046                        | 95                                  | Field accession                         | Uslu                           | 1                  | TUR     |
| ESP-046                        | 1353                                | Field accession                         | Vaddarica                      | 3                  | ITA     |
| ESP-046                        | 103                                 | Field accession                         | Valanolia                      | 2                  | GRC     |
| ESP-046                        | 1837                                | Field accession                         | Valanolia                      | 1                  | GRC     |
| ESP-046                        | 2020                                | Field accession                         | Valentins                      | 3                  | ESP     |
| ESP-046                        | 613                                 | Field accession                         | Vallesa                        | 2                  | ESP     |
| ESP-046                        | 664                                 | Field accession                         | Vaneta                         | 3                  | ESP     |
| ESP-046                        | 749                                 | Field accession                         | Varudo                         | 3                  | ESP     |
| ESP-046                        | 850                                 | Field accession                         | Varudo                         | 2                  | ESP     |
| ESP-046                        | 1978                                | Field accession                         | Velika Lastovka                | 3                  | HRV     |

| INIA-FAO<br>collection<br>code | Register<br>Number of<br>accessions | Type of material                        | Accession name             | No<br>Trees/Plants | Origin* |
|--------------------------------|-------------------------------------|-----------------------------------------|----------------------------|--------------------|---------|
| ESP-046                        | 660                                 | Field accession                         | Vera                       | 2                  | ESP     |
| ESP-046                        | 532                                 | Field accession                         | Verdal de Alhama           | 2                  | ESP     |
| ESP-046                        | 663                                 | Field accession                         | Verdal de Manresa          | 1                  | ESP     |
| ESP-046                        | 394                                 | Field accession                         | Verdala                    | 4                  | ESP     |
| ESP-046                        | 76                                  | Field accession                         | Verdale                    | 4                  | FRA     |
| ESP-046                        | 585                                 | Field accession                         | Verdalón                   | 2                  | ESP     |
| ESP-046                        | 887                                 | Field accession                         | Verde Verdelho             | 3                  | PRT     |
| ESP-046                        | 2028                                | Field accession                         | Verdeña                    | 3                  | ESP     |
| ESP-046                        | 877                                 | Field accession                         | Verdial de Badajoz         | 4                  | ESP     |
| ESP-046                        | 889                                 | Field accession                         | Verdial de Badajoz         | 2                  | ESP     |
| ESP-046                        | 988                                 | Field accession                         | Verdial de Badajoz         | 2                  | ESP     |
| ESP-046                        | 1162                                | Field accession                         | Verdial de Badajoz         | 2                  | ESP     |
| ESP-046                        | 759                                 | Field accession                         | Verdial de Badajoz         | 2                  | ESP     |
| ESP-046                        | 370                                 | Field accession                         | Verdial de Cádiz           | 3                  | ESP     |
| ESP-046                        | 6                                   | Field accession                         | Verdial de Huévar          | 2                  | ESP     |
| ESP-046                        | 155                                 | Field accession                         | Verdial de Huévar          | 2                  | ESP     |
| ESP-046                        | 156                                 | Field accession                         | Verdial de Huévar          | 2                  | ESP     |
| ESP-046                        | 954                                 | Field accession                         | Verdial de Huévar          | 1                  | ESP     |
| ESP-046                        | 397                                 | Field accession                         | Verdial de Montefrío       | 2                  | ESP     |
| ESP-046                        | 883                                 | Field accession                         | Verdial de Vélez-Málaga    | 2                  | ESP     |
| ESP-046                        | 51                                  | Field accession                         | Verdial de Vélez-Málaga-51 | 2                  | ESP     |
| ESP-046                        | 677                                 | Field accession                         | Verdiell                   | 3                  | ESP     |
| ESP-046                        | 36                                  | Field accession                         | Verdilla de Calatayud      | 2                  | ESP     |
| ESP-046                        | 2132                                | New accession at propagation facilities | Vidrillo                   | 3                  | ESP     |
| ESP-046                        | 364                                 | Field accession                         | Villalonga                 | 2                  | ESP     |
| ESP-046                        | 793                                 | Field accession                         | Villalonga                 | 2                  | ESP     |
| ESP-046                        | 1065                                | Field accession                         | Vinyols                    | 2                  | ESP     |
| ESP-046                        | 1932                                | Field accession                         | VS6                        | 2                  | MAR     |
| ESP-046                        | 725                                 | Field accession                         | Wardan                     | 2                  | EGY     |
| ESP-046                        | 1741                                | Field accession                         | Wateken                    | 2                  | EGY     |

| INIA-FAO<br>collection<br>code | Register<br>Number of<br>accessions | Type of material                        | Accession name      | No<br>Trees/Plants | Origin* |
|--------------------------------|-------------------------------------|-----------------------------------------|---------------------|--------------------|---------|
| ESP-046                        | 2344                                | New accession at propagation facilities | Yag Celebi (Tatayn) | 3                  | TUR     |
| ESP-046                        | 2366                                | New accession at propagation facilities | Yag Zeytini         | 2                  | TUR     |
| ESP-046                        | 2336                                | New accession at propagation facilities | Yaglik Celebi       | 2                  | TUR     |
| ESP-046                        | 2328                                | New accession at propagation facilities | Yaglik Sari Zeytin  | 1                  | TUR     |
| ESP-046                        | 2367                                | New accession at propagation facilities | Yerli Yaglik        | 2                  | TUR     |
| ESP-046                        | 689                                 | Field accession                         | Yun Celebi          | 4                  | TUR     |
| ESP-046                        | 2341                                | New accession at propagation facilities | Yuvarlak Celebi     | 1                  | TUR     |
| ESP-046                        | 2334                                | New accession at propagation facilities | Yuvarlak Halhali    | 2                  | TUR     |
| ESP-046                        | 1982                                | Field accession                         | Žabarka             | 3                  | HRV     |
| ESP-046                        | 1607                                | New accession at propagation facilities | Zada                | 2                  | SYR     |
| ESP-046                        | 1605                                | Field accession                         | Zael Almuhra        | 3                  | SYR     |
| ESP-046                        | 788                                 | Field accession                         | Zaity               | 2                  | SYR     |
| ESP-046                        | 1108                                | Field accession                         | Zaity               | 2                  | SYR     |
| ESP-046                        | 1109                                | Field accession                         | Zaity               | 1                  | SYR     |
| ESP-046                        | 117                                 | Field accession                         | Zalmati             | 2                  | TUN     |
| ESP-046                        | 1679                                | Field accession                         | Zalmati Zarzis      | 1                  | TUN     |
| ESP-046                        | 1886                                | Field accession                         | Zalmati Zarzis      | 2                  | TUN     |
| ESP-046                        | 1888                                | Field accession                         | Zarbout Louzir      | 4                  | TUN     |
| ESP-046                        | 1140                                | Field accession                         | Zard                | 2                  | IRN     |
| ESP-046                        | 1810                                | Field accession                         | Zard-1810           | 1                  | IRN     |
| ESP-046                        | 1669                                | Field accession                         | Zarrazi             | 2                  | TUN     |
| ESP-046                        | 1828                                | Field accession                         | Zarrazi Douirat     | 3                  | TUN     |
| ESP-046                        | 1733                                | Field accession                         | Zarrazi Injassi     | 2                  | TUN     |
| ESP-046                        | 1911                                | Field accession                         | Zarrazi Injassi     | 1                  | TUN     |
| ESP-046                        | 1407                                | Field accession                         | Zarrazi Zarzis      | 2                  | TUN     |
| ESP-046                        | 1630                                | Field accession                         | Zarrazi Zarzis      | 1                  | TUN     |
| ESP-046                        | 1680                                | Field accession                         | Zarrazi Zarzis      | 4                  | TUN     |
| ESP-046                        | 1731                                | Field accession                         | Zarrazi Zarzis      | 2                  | TUN     |
| ESP-046                        | 1897                                | Field accession                         | Zarrazi Zarzis      | 4                  | TUN     |
| ESP-046                        | 1877                                | Field accession                         | Zarrazyet Sned      | 4                  | TUN     |

| INIA-FAO<br>collection<br>code | Register<br>Number of<br>accessions | Type of material                        | Accession name       | No<br>Trees/Plants | Origin* |
|--------------------------------|-------------------------------------|-----------------------------------------|----------------------|--------------------|---------|
| ESP-046                        | 38                                  | Field accession                         | Zarza                | 2                  | ESP     |
| ESP-046                        | 356                                 | Field accession                         | Zarzariega de Orcera | 4                  | ESP     |
| ESP-046                        | 1933                                | Field accession                         | ZDH4                 | 1                  | MAR     |
| ESP-046                        | 1934                                | Field accession                         | ZDH6                 | 3                  | MAR     |
| ESP-046                        | 1948                                | Field accession                         | Zeboudj Boudoudan    | 3                  | DZA     |
| ESP-046                        | 1890                                | Field accession                         | Zeitoun Boubezzoula  | 3                  | TUN     |
| ESP-046                        | 1941                                | Field accession                         | Zeitun lkhl          | 2                  | MAR     |
| ESP-046                        | 1523                                | Field accession                         | Zeletni              | 2                  | DZA     |
| ESP-046                        | 1945                                | Field accession                         | Zitoune DK           | 3                  | MAR     |
| ESP-046                        | 1935                                | Field accession                         | Zms_1                | 3                  | MAR     |
| ESP-046                        | 2345                                | New accession at propagation facilities | Zoncuk               | 3                  | TUR     |
| ESP-046                        | 2134                                | New accession at propagation facilities | Zorzaleño            | 3                  | ESP     |
| ESP-046                        | 1936                                | Field accession                         | Zsb2                 | 1                  | MAR     |
| ESP-046                        | 1996                                | Field accession                         | Žutica               | 2                  | MNE     |
| ESP-046                        | 1985                                | Field accession                         | Zuzorka              | 3                  | HRV     |
| ESP-046                        | 1946                                | Field accession                         | ZZ 10                | 2                  | MAR     |

\*ALB=Albania ; ARG=Argentina ; BiH=Bosnia and Herzegovina ; CYP=Cyprus ; CHL=Chile ; DZA=Algeria ; EGY=Egypt ; ESP=Spain ; FRA=France ; GRC=Greece ; HRV=Croatia ; IRN=Iran ; IRQ=Iraq ; ISR=Israel ; ITA=Italy ; JOR=Jordan ; LBN=Lebanon ; MAR=Morocco ; MEX=Mexico ; MNE=Montenegro ; PAK=Pakistan ; PER=Peru ; PRT=Portugal ; SVN=Slovenia ; SYR=Syria ; TUN=Tunisia ; TUR=Turkey ; URU=Uruguay ; USA=United States of America
