# Supplementary material for: Utility of EST-SNP Markers for Improving Management and Use of Olive Genetic Resources: A Case Study at the Worldwide Olive Germplasm Bank of Córdoba
Source: MDPI journal article supplement (doi:10.3390/plants11070921), 2022-03-29
Supplement: s1 [file s1]

**Supplemental Table S2:** Sequences of the core set of 96 EST-SNP markers used in the study

| Contig         | Sequence                                                                                                                                                                                                            |
|----------------|---------------------------------------------------------------------------------------------------------------------------------------------------------------------------------------------------------------------|
| EContig10374   | CGAAGATGACAAGATCGATGAATTGGACAAGTCGGAGTACGTGGGAACTTTTGCACAAGTACCCCATAGTCATAAAGGACCTAAAAAGGT<br>[A/G]AAGACGTCGATTAGGCTGGGATTAACAGAGCTTTTGGAGGATTTGGATGTAGAAGATGATGATTCAATCTTAGTGAGTTTGGTGCCA<br>CGGGCTGGAGATGTGACC    |
| EContig10531   | AAAGCAAGATTTCTGTCAAGAAAGAGGCAGTAAAGTCACAACTGATGAAAAAGGCAATGCTAAATCAGATTCTGGTGCAAACCTTTGACA<br>[C/G]CTTTAAAGAAAACAGATCATCTGATAGCACTGATTATTCAAGTGCAATCTTGAGTGAAGAAATCAACAATAGCCCGACTGCAGCTAT<br>TTCATCGTCGACCGAGAA    |
| EContig10539   | GCCCTTCAGCACCCCTTTTCTTGACGATATAATTTCTGTAAGAATAGTTGGAATCAAACCTTTTATGCAACTGATCTCTGTCTGATGGGTGC[A/<br>G]CGCTGTTTCACGTGCTCAATCACAGTAAATACTACTGTCTCGAAATCCAAGGGAAAAGATGCATTTATTATATAGCAGAGGCCAGTTTGC<br>ACACTGGTTTTATGTA |
| EContig10640   | TGCTTTCAATCACACTGCTTACAAGGAGGTGTTGGAAGCTGAACCTCCTGAGTGGCTTCCAGACAGTTCCACTACAGTTTGTATGCATTG[T/<br>C]AATGCTCCTTTCACAGCTTTGACTCGTGGAAGACATCACTGCCGGTTTTGTGGAGGTATTTTTTGCAGGCTCTGCTCAAAGGAAGATGC<br>TTATTACCTTTTAAG     |
| EContig10787_1 | GTAATACCCCATCAGTGCCTCTGGTGTTTTCGAGTCACAAGAATCTCTTCACTGGTGATTTCTCTGTAGATCGGTGGATTTTCTTCGGTCA[A/<br>G]TAACTCCTTTATTGGTCCAAACACTTTATTTTTACTTTTTTCGTGATAGTGCAATCTGAAAAAACTTGCCACTGAGATTCTCGGCCCCACA<br>GTTTTCGCCAATAC   |
| EContig1180_2  | TGCTGCTGCACGTTGAGGCTCCTCGGCGCATTGCGCATTTCTGCTCCTYGACGCCAGCTGAGAAGGAACGCAACCTAAAGGTCCAGTTCC[<br>A/G]GTGACAAGAACCCTTCTGGTTCCCAATTCATGTAGCCTCATCAAATTTTCCTGTATTAGATAACGGGAGAAATCTTGAA<br>GATTATACTGAATCCTT             |
| EContig12203_1 | GGGGATAGAAAGGGGGAGAGTGATAGAGAACTCAACGGTACGATGGTGGAGAACGGTGTTATCACGGAAGAGCAGCAGAGGCAGATCG<br>C[C/G]GATAACAGAAACGACGTCGTTACCAACCATTGGAAGTCCGGGGAATCTACTYCCCCTACCGATCGTCCCGTCCGCGTATACGCTGA<br>CGGAATCTACGATCTCTTC     |
| EContig12584   | CAAGAAAGCGAACTCGTGACAAAAGTTCTAAAATGACAGAGAGTGAACCTGGAGGCTGATCATAGTGAAGTACGATCTGAAAGTGTCATAG<br>[C/G]AGGTGGCATCAAGAAGAGGCGCCAAACAGGTGCTCCAGCTGTGCAAAATGTTGGCGAGAAGCGTTACAATCTACGGCAACGGAACC<br>GCAAGAATGTTGGCACGGA   |
| EContig1263    | CCATAACGGTTCCCCTGTTTCGAGGCAAGAATTACACGCATCCAATAGAATGGATCCGCACCTGTTGTGGAGTGTATGCCATACAATGGCA[<br>A/G]CTGACTGCAAACCAGGAAAATGAAAAGAGATATCACAGTGTAGATGACCTTCTCTCTAAATGGAATTTTCCTATCTGCGCTCTGAACC<br>TCGGGCAGGAAAGAAAG   |

| Contig        | Sequence                                                                                                                                                                                                           |
|---------------|--------------------------------------------------------------------------------------------------------------------------------------------------------------------------------------------------------------------|
| EContig1372_4 | GCACGAAAACGCGCCCTTCAAATTYCCCGGCACAAAAGCGGCCTGGAAGTGTATTTCAGTGGCATCAGATGCAGACTTAATAGCCGAGCA[<br>T/C]CAAATTTGGAGCGCGGTCGACCCCAATGGGAAGAACGAAGGTTTCAACTGCAGCAATGGGGACCTTTTCAAGTGGAAAGCATATGTGG<br>AAGATATTGGCTGAACAA  |
| EContig1634   | TAGGATTCCCAAGGTCCAGCAATTGTTGCAGGACTTCTTCAATGGGAAGGAACTTTGCAAGAGCATCAATCCTGATGAAGCTGTTGCTTA[<br>T/C]GGTGCTGCTGTCCAGGCTGCCATTTTGAGTGGTGAGGGTAATGAGAAGGTGCAGGATCTTTTGCTTTTGGATGTCACTCCCCTCTCTCT<br>TGGTCTGGAAACTGCT   |
| EContig1775_5 | GAGGGTATTGCTGTTATTGATCTCAAGGATTCATATCCCAATGTCATGGAAGATTACAGGCTTTGAAAGCTTCGGGGCCAAATTTGGCTG[T<br>/C]TATCGAACTTCGACTCACAGGAGGACATAGCATATCCAAACGATCCCCGAGCAGTTWTTAAAGTTGATGATGATCTGAAACAATTATTC<br>AGGGGGATGGAAGTCC   |
| EContig181_2  | TGCAGCCAAATTTGATGAGTATGCAAGGGGTATGATAAGCTCTTCCGGTTCTACCTTCTTTGAGGAGCTCGGATTGTACTACATTGGTCC[A<br>/G]GTGGATGGGCATAATATCGATGATCTTGTTACTATATTTCAAAAAGTAAAGACAATGCCAGCGCCAGGGCCGGTTCTAATTCATATTAT<br>AACAGAGAAGGGAAAA   |
| EContig1813_3 | CAAGATTCAAAGACCGATCCCCTCATTTTTGGATCATATKTTCTTCATAGAATAAGTGACTCATCTAGCAAATTAGGTGCTTATTTTAAC[T/<br>C]GAAAATGAGCTAGTATATTGGTGGGAGTCCCATAACTTCTTCAACTTCATGATTTGCAGATTTCATCCAGAAGCCAATTCTCAAGAAATGA<br>CAGAGGAGGATTATT  |
| EContig1816_1 | AACTGATTCTGCAGTAGCAGTAGTACCCTCACACATTCAGCAGTGGGATTGTTTTGAGAACCAATCTTGGGAGATGACATCCATCCTTT[T<br>/G]AGTAATCGGGATATATTCTCTGCGCTTGAGGCATATATTGAATTAGAATTTTCGGTTAACTTGACGTCRCTTGATGAATCATTCTGGCTG<br>CTACTGTTGACACCC    |
| EContig1839   | AATAAAGGAACGAGAAATATACCACTGGAACAATTTTATGTTTATTTTTTAACACATTTCTTGATACAGACCAGATGGCGACAGACCGACC[<br>T/C]TATATATTTGCTTATCAAAGGCTGCTAGAAGAGTCCCTACGTTTCAGTGCAGCGTTCATAGATTGATTTCTCGACCGAAAATCCAGCTGA<br>AGGGGGTGGCCGATGC |
| EContig188    | CGAGGATCCTGCAGAAGGAGAGGAAGCCCTGGTTGCGAAATTCAAGAACTTCACGAGGATTTGACATCTGGTTTCCGCAACCTCGATGA[<br>T/C]GAAACTCGGTAATCGATGCATAGGTACTAAACAAATTCATGCCAAATCAGCTTTGTCGCTGCTTTTCGTGCTGGTGGGAAAACCTAACT<br>TATTGTGAAATTCTTAA   |
| EContig1947_3 | CTAAACTATATGAAAAATAAACAAGGGTCTCATAATTCATAACCATCCACCTCTCTCATTACACACACAATCCAACAAATAACATCAAAC[A<br>/T]GAAAATAGGACAGATGAATTCAATTTCCATACTCGTTTAGTTGGTGGGGTTGCTCCTGAAGGATCCCAAAGCCTTAAGGGCTGCAGCTC<br>TAAGGATATACTGGTG   |

| Contig        | Sequence                                                                                                                                                                                                   |
|---------------|------------------------------------------------------------------------------------------------------------------------------------------------------------------------------------------------------------|
| EContig1962_1 | AACATATTGATATTGGATATGCTCCACAGATCTTCAGTGATGAAAACCCTAATGCATGTTTCAGTTATGTGAAATTTGGGATGAACAAGGG[A/G]TGGAGTTAGGGGGGCACACCGCACATGGATARCTGTTCCATGACATGTTGTTGTGCTCTACATGTGGTCATGTCTGGGTTTCGTAGTATAATCTACAGGAAGCTG  |
| EContig1987_2 | GAATTAGAGCCTTCATCCTGAGACTGAGATGATCTCCTTTATCGTATTAATAACAGCCTCTCGAATCAAAGCAGATCTGGGGCGAATT[A/G]AGAAGCAAGTCAACTCCGAGTTCAAGTCAGAAATTATTTTCTTTTCTTTCCCGCACTTATTGACAATCCCCAACGATTGGTTGTATCGTCAGGGTGTCTCTATTC     |
| EContig2068_2 | TGATTTGCTAGCAATTTTAGAAGAATATCAGGTTAATRAATGCATATTTGTTGGCCATTCTTTGTCTCCATGACTGGTGCTATAGCTTC[T/C]ATCTTTCGGCCTGATCTCTTTCAAAAAATCATCACGATTTCTGCTTCTCCAAGGTTTATAAATACTGAGGATTACTATGGAGGATTTGAA CAAGAAGACATTGAG   |
| EContig2172_2 | ATTGCTAAATGAAGTAGTTTCACAGAGCAATTAAGGGAGTAAATTCGTGCTTTTGTGTGGCTCCTTGCCTGAATAGTCATTTAAATGCGT[T/C]ATGTGGCCTTTGCAAGGGAAGTGGTCGAGGTTTAAACTGGTTCCTGAAGTAGTTAATTCGTAAATGAGAGTCTCTATTGATGGACCTTGAGTCTAGAGGTTCTT    |
| EContig2305_1 | TCTATCTGGATAAACACTTGAACAAAACCTTCAGCAGATTATTGTAGGTATCTTCGGAATTCCTAGAAATAGAGAGACAATAAAATAAGC[A/T]AAACAATTATAAGCTACATGTGTCGCGTCCAACCTTTGATCTTTGTTGCTGTTGCTTTGTCACCATTGAACCTCAAATTC AAGGAGGCCATCAATCGAGCTTC    |
| EContig2458_2 | AATAGTTGCAAGCTGGCTCTTATCACCCCATTCCTCCCAAAGAAAGTAATTGAAAATGCCTTCAGCAAGATGGGCGAGAAGAATTGAGCAAG[A/G]AAAGGACGGTTTTGCTTCTTCAAATTGTCATCAWCCTTATTGTTCTCTTTGGATGATCCACCATTACCTTTTATATCACCACCCAATTTTGCTTCAACTTCAGCC |
| EContig2514   | GGATGTAGCATAAGCATGAGGAATATCCCAATAAATCACAGAGGCGACACTAGAAGTAAAGATAATGCTCCCTTTCTTGCCCGGAATCAT[T/G]ACCCTTGCAGCGTGTTTGGCGCATAGAAACATGCCAAAAACATTAACGTCGAAAACCCTCTTGTAATCTTCATATTCGGTAGCCAAAA TTGATGTGTCGCCCTTG  |
| EContig2705_2 | AAAGTATCAAGTTACACATCTCAAGACCCACTGCGAGAAGTTCCTGATGTCCAGACTGAACTGGGAAAACCTCACTACCCTATTATGCTTT[T/C]GCTCACCAGCACTCTGCAAAATGCTTGCTTGATGCATCATTGTCGTTGATCATGGACAACATGGACAAGCTTAGTAAGCGAGAAGAGTACATGGAACCTGTGGAG  |
| EContig2785_2 | AATGAATGAGTGATAATCCCAGAATCCAACGGCATGAGCCACTGGCGTATTCCTCTTAGTGAAAAGATTCTCAAACCTGATAGGTCTGAAA[A/G]TAATCTGTAATCGTCAAATTACAGCAGTAAATCGACAACCCTTTACACTCCCATCCTTTGTGCGCACATTTTCTTCCCCTTCACCTTCTTCACTCTCAACGTCGGA |

| Contig        | Sequence                                                                                                                                                                                                           |
|---------------|--------------------------------------------------------------------------------------------------------------------------------------------------------------------------------------------------------------------|
| EContig2906_2 | ATATGTGAATCAGCTTTGTGAGAGCCTCCCWAGTCCAGCGGGCGAGTCTGCAATTGACTGCGATTCCATGTCAGACATGCCAACTGTCAC[<br>T/G]TTCACCATTTGGAGGCCAAAGCTTACCCTCTCACACCAGAACAGTATATTCTCAAAACTGGTGAAGGCATCGCCWCCGTTTGCATCAGTG<br>GATTTATGGCTCTGGAT |
| EContig2937_4 | GTATGTGGACACTTTTGTGCAGAAGGACGCTGCTGGACATGCAGTTGGGGCTGCAGCTTAAAACCGCCTTTTACAAAATCTTGAAACTA[<br>T/G]TGTCTTTAAGCATAAACTTAGCCGTATGGAGTTGCCGAATTTGTGTACCTTTGGTTGGACGTATGGCTTGTGTGTTATTAAATAAAATA<br>AATGTGTTTTAAATTG    |
| EContig2950_2 | GAGTCGAGTACTATATTAGTCGAGTGTACAAGTTTACARTGGAGTGGGAACAGCTCTGAGAGGATTTGCTTTCTGCAATGTTATTCCAAA[T<br>/C]TTCTCTTCCATATCCAACCTCCTTCGGTGCAATTCCCCCTTCAAGCTTCCAATCAAATGAATTCAAAAGTGAACCCAACATTACAGGAACC<br>ATTCTAATAGCCAAA  |
| EContig298_1  | ATGGATTAGTCCATCAGCTTGGAATTCCCAGTCGATAACATAATCATAGTTAGCAAGTGACGCTACCATCCTTGCAACTAATGACACCTT[A<br>/T]GGTCTTGCCTCTCGGATCTCCTCGCCTACTATTGGGCTCTCGGTGTGACGCCAAGCAGCATCACCCGAGTASCGCTCGAACAGACAGATC<br>ATGTTGGACCTAACA   |
| EContig2998   | CCAGTACTTGAAAGAGAAGGGTAGCTTTGGAGATCTTACTCTTGGTCTCACTCAGAATTTTGAACCCAAAGGAGCTCCAACGGCAACTGA[<br>A/G]ACCATGAACCTATTCCCAGTCATTGGGAACCTCTGAAACTCCGACCCATGAAAACTCAACATGTCCATTATCCCTCAGAAGAAAAGTG<br>ATCTCAGTAGGGACAAG   |
| EContig3075   | GAATTTCCGAAGGAAAAGTGTGGTGGGTTTGAACCTTGATTTTCTGCTCCTGAATTTGACGAAGCACTCGTCGTATCTCATCTACAACGC[T/<br>C]TCCCTCTACTTTAGCTCCACCGTGCAGAGGCAGTACCGCCAAAAATTTGGCCTCAATGAGATGATACCTGTGGCTGCCAATGATGTAGCT<br>TTCTCCATTCACGCT   |
| EContig3144_2 | TCGAATCCTAATGTTAGATATCTTTCCATATGGTTCAAAATGCCTTTCAAGATCTCTGGTCCTGGTACTGATAGGATCAAAGTTGATGAT[A/<br>G]AACAAAGTTTTTGTGGTCTTGTGTTAGCTGCAGATCTTCTTGATCTATCAGGCTTCCTGCCACCACGTTCTTGCTGCTTTGTCAGTTCAA<br>CACGAAGTCGGCGA    |
| EContig3225_1 | ATTTAAAGCTGCGTTTGC GCGGAATGATTTTGACAAGTGTAATGAACTCCTATCCCAGCTCAAGGTTCTGCTGACAAAATTGAAGAGTCT[A<br>/G]CCTCCATTATTCGAAGAAACGCCAAATGCAATCCATGAATTGACACTAGCAAGGGACATATATGAGCATGCRGTTGTTTTAAGTGTGAA<br>GATTGAGGATCTGGAT  |
| EContig3597_1 | AATCCGGTATAGCAGAAACGGTAACAATCATTTATTTTATTCCAAGACATGATTGGCTAAACCTATTCCTTTTTTCGAGTAGAGACGAAGA[A<br>/G]CAAATGCTAATCCCAATATCAATAASGGCAGGATAAATAGCAGTATCTTGGATGAACTCCCCGAGTCCTGGTTTGCAGTTGAAGTTGCA<br>CTTGGAGGTGGGGTGT  |

| Contig        | Sequence                                                                                                                                                                                                    |
|---------------|-------------------------------------------------------------------------------------------------------------------------------------------------------------------------------------------------------------|
| EContig3889   | TGGTATATTTTGTCTTGGATCTGGGGCTACAATTGTTTCATGGAGTTCAAACTTGTGGACTTCTCAGCCTCCTGAGCATATTGAGTATGC[A/G]GCTCTGGTGATTGGTGGCTCTTTCATTATGGAAGGTGCTTCTCTTCTTGTGGCCATCCATGCTGTCAGAAAAGGTGCTGCTGCGGAAGGAATGAATGTGAGAGAC    |
| EContig3935_2 | ACTGACGATCTGTGCACCGATCCGGAGGCTTCTGGAGGYTTGTTGTGGCCTCCAGCCTCCAGGTAGTGCTCTGCTCCTCCTTAATTCTCC[T/C]ATTCGCGATCTTCGGTAGAACAATGACTATTCTCCTCGTGTTGATTCTGATCCACTAATGTTTTCACTTCGCTGTTGGTCCGACTGTAGTGGTGTTTGCTGATT     |
| EContig4112   | TTGCAGCATACCCATCCTTCGCTGCCTCATTATGATTCCACCGAGTGGGATTGGTTACGCGGAGCTTTAGCAACTGCTGACAGAGATTAC[A/G]JGGATTCTAAATAAGGTATTCCACAACATAACGGATACTCATGTCGCGCACCATCTTTTCTCAACAATGCCACACTATCATGCAATGGAGGCAACCAAGGCAATCA   |
| EContig4297_2 | TTGTAGCATCTGCGGTGCTTCCAGAAATTTTCGGACTCTGAAAGTTTACTAAGGTAAGTTGACAATCCCATCTTTGAAAAGCTATCGACCA[A/G]TTCAGCAATCCCTGGAGATTTAGATTCCAACCTCAGCGAATAGCTTTGTGAGAGTTTCACAGAGAGGCTCCGGTACTGATTTCAAAATTT CAGAAATATTAGACTT |
| EContig435_10 | GAGGCCTTATGGACTATGCATTCGATTTTCATAATAAGAAATGGTGGCATTGACACTGAAGAAGATTATCCTTATAAAGGCTACGATGACA[A/G]ATGTGACCAATACAGGAAAAATGCCAGGGTTGTGTCCATTGATAGTTATGAAGACGTAGCTCCATATAACGAAAAGGCACTAAAGAA GGCGGTTGCAAATCAACC  |
| EContig4380_1 | GAAAAATGCCATGGCAGGTATGGACGSTGATATGATGGAAACGGAGGCAAACGCTCCGCCGCAACCGGTGGCTGTAAATGCCGACCAGAC [T/C]GACGCTGTTCGGAATTTGCTGATAATGGCTAGGCAACTCATCGATCAAAACAAGCCTTCTCAGTCTCTTCAAGCGGTGGTGATGGCAA TGWGATTACAAGGTGGG  |
| EContig4424_1 | AAAATTTGTGAAATACTCCTTCTAAGAAAGCTGCATGGGAAATTGCAGGTCATGTGAGCCTAGGTCCACGGTCACAGCCAAGTTAATTCT[ T/C]GTAGACGGAGAGCTAGAAGAATTTCCATGTCCAATAAAAGTGTCAAATTTGCTTGAACAAAATCCAGATTGTTTCATATGCAATTCAG ATGAAATGGGATTTGGC  |
| EContig4490   | CCATTACCTCGAACAACGGCTGTGTATAGTCGGAAAAATGTACGAGTCTCATCTATGCTTCTTGG[A/G]TTGATGCCCAGGCTGCGAGATCC ATCGCCGTGACGCGGTGGCCCTCCGCCTCCAGCAGTGATTGTAACCTGTACCAGCACCAAGCTCCATGGCACATACCATGCACTAGAACAA AATTGTTTTTTGTTGA  |
| EContig460_6  | ATAAAGAGCCTCAACTTAGGTAATGACGAGAAGGTGCRCTATTAGCTACTGTTTTCTCACTCATTCCCTTCTACTGTACATATTCGAGCT[A/ G]TAGACTTGGGAGAATCTGTACTTCTGTCTACTAAGGAAAGCTGGCTGAGGATATATCTAAGAATTGTGCAAAAAACACACAATAACGAA GAGGTACCGAAGATCT  |

| Contig        | Sequence                                                                                                                                                                                                            |
|---------------|---------------------------------------------------------------------------------------------------------------------------------------------------------------------------------------------------------------------|
| EContig465    | ATGATCTTCACATTTTACAAGGCACAAGGTCTTTCAGTTGGGTCGTCCCTAGTGGAAGAAGACAAGCTGGATCTTGCAACAACCCTTATT[A/<br>/G]AGAAGGCTAAGGCCAAAGGAGTCAGTCTCTTGTTACCTTCAGACGTGGTTGTGGCAGACAAGTTTGCTCCTGATGCAGATAGCAAGATT<br>GTGCCGGCATCTGGTA   |
| EContig4794   | TGTTACGTCAGAGAGATCCTTCAGAGTTGTCCCAACATATACCAGGGCAAAAGTAATTGGCATCATTCCCAACCACGATGCTAGCATGTA[<br>A/C]TGTCCAATGGAGACTGGAGTCACGGATAAGAGGTAGTTCAACATGTTAAATGGAAGTAAAGGAACAAGCCGAAGAAGCAAAACAAT<br>CTTGAATCCAGATCTCCGA    |
| EContig504_6  | TCGATATGAACCCATATCGATTTCTTCTGGATTTTCTTGGCTGGTGTCAAGGAGGACATCTAACACATCACTGTTTTTGCTATTATCGGAC[A/<br>T]TCCTTCTCTTCAACCTTTCATTAATCAAGCCACCGAAAAGCTCTATGATCTTGCCAAAATGAATAGTCATGCGGCGCCGTATACCTAGAG<br>GGTCTAACTTTTCAA   |
| EContig5140   | GAATGGACTTTCCCCAGTGGAGACTCAGTCTGATGGCTGCCTGCCCCTTCCAACTCAATGGAAAGTCAATGTACTTCAGAAGAACCAAG[<br>A/G]TCTTCACATAGTGGCCATGCAACTTTGTTTACTGATACGAGATGTGCAGATATTTCACTGTTTCCTGAAAGTCACGTAGAGTTAAGTG<br>AGTACACAGAAGAGAAG     |
| EContig515_2  | TTCAGCTGACTCGGCACCAACTTCCTCGTAGTCCTTCTCCAAAGCAGCAAGATCCTCTCTCGCCTCAGAAAATTCACCTTCCTCCATACC[T/<br>C]TCTCCAACGTACCAGTGCACAAAAGCACGCTTAGCATACATCAGATCAAACCTTGTTGGTCAATTCTTGAGAAAACCTTCTGCCACACTAGTC<br>GAGTTGGAAATCATA |
| EContig515_3  | GATAACTGGCGCATATGATGAAAGCATGAAGTGGATCCTAGGATAGGGAACCAAGTTTGTCTGGAACCTATTCACATCAACATTCAAAGC[<br>T/C]CCATCAAATCGCAGAGATGCTGTCAATGAAGAAATCACCTGAGAAATGAGCCTGTTGAGGTTAGTATAAGTTGGCCTTTCAATGTCAA<br>GTGATTGCGGCAGATA     |
| EContig5168_5 | CGATGACTCCATTTGCATTAATAAGAGCCTCACGAGCTAAAGCATTGATCTCCATAGTGTATCGCAAATGAGGATGTAATAGTTTGTAAT[T<br>/C]CGGGTGCATCGCACTTAGTTGTCGATTTGTTGCAATTACGTAAGGCTCCGTACAACAATGAGTTCTTAGCCAGTGACTGACTAACTGAT<br>GAAAACCTGAGTCAAT    |
| EContig5183   | TGTGAAGCTAAAGAGTGCACCTGTGCGGAATGCTTCAAAGGTAAAGCAGATAACGCGGGTTTTCAAAGTGGGTAATGAAGAATTATCTTA[<br>T/C]GTGGTCGAAATGGCTACCAATCTGAATGATCTTCAACCACATTTGGAAGCTTCTCTTAAGAAGATTTGATGCTCGGATGTCTAGCTTAT<br>AATAAATAAGTTTGCA    |
| EContig5193   | TGCTGGAGCTGCACCTGAAGAGAAAATCCAGCGAGGAGGAGCTGACTGAAGATGAGTATGCGTCCAGTGATGAAGAAGTTGCCGGGAAAG<br>T[T/C]GACCCCTAGGGTCTGAATTTGCAGTTCGATTGGCTCTTATCTGTACATGATATGTTACCTATGTTAGTAAACCTTAACCTAC                              |

| Contig        | Sequence                                                                                                                                                                                                     |
|---------------|--------------------------------------------------------------------------------------------------------------------------------------------------------------------------------------------------------------|
| EContig5258   | GCTCAATACTCGGGACAATATCTTTCAATGTGGAAGACAGGGTTTTGAAATGGGCAATTAGTTTCTGGCATTCACTTTCATACTCTATAG[A/G]CGAAATAATATCACGAACATAAGCCTTCTCGAGTTTCTCTGTGGCCTTTATAATCGCAAAAAGGTCAGCAAACTATCATACATCTCTCTTTCGCGCTTGTCATT      |
| EContig526_2  | TGTCAATGATTTCTTGGGTCCAAAGCTCACTGGTGTTGATGTCAGGAATCAGGCTGATGTTGATGCGATTATGCTGGAGATTGATGGAAC[T/C]CCAAACAAATCAAAATTGGGGGCTAATGCAATTCRGGAGTTTCTCTTAGTGTATGTCGAGCTGGAGCTGGAGCAAAAGGGATACCCCTCTACAAACACATTCAG      |
| EContig5399_1 | CCCCGTCTCTTCTTTACCTCAGCAAGATACTCAGCAAGCCTTCTAGCACATTTGGGTCCACGAACCTGGCTGAGAGCACAATGGAAAAC[A/G]AGGGTATCTTTGTCCTTGGCAGCTTCAATAAGACTGGGTATTTTGTCAAGAAACGTATCGCTAGCATAATGAAGTGACCCCGCTATGTGCCATCGTAGTTCCTC       |
| EContig5478_1 | CTCAACCTCGACACTACTRATGTTTTCGCCTCCTGATATAATTATATCCTTTGATCGATCTTTAATTTCTATATAACCATCTGGATGCTT[A/C]ACACCAAGATCTCCAGAATGAAACCAGCCACCAGCAAAAGATTCTTCATTTGCCTTAGGGTTCTTCAAGTAGCCCTTCATTAACAAGAACAATTGCCCGGAAAA      |
| EContig5674_1 | GCCATCAATAAGGATCTGAAAGCTGATACGAACGACGAATACCTCACCTTGCTGCGAGCAACTATTAAGTGCTTAACTTGTCCCGATAAG[T/C]ATTTTGAGAAAACCTCTTCGTYTGGCTATCAACAAGATGGGCACAGACGAATGGGCTCTCACTCGTGTTGTTGTTACACGAGCTGAGGTGACATGCAGCGTATCA     |
| EContig6361   | ATCACCGCAACAAAGAAAGAAACTCACGAGCAAAAACATGGCAACTTCAGCAATCCAACAATCTGCATTTGCAGGCCAGACAGCCTTGAA[A/G]TCCCAGAATCAGCTCATCAGAAAGGTTGGCAACCTCGGAGGTGGCCGCTTCACCATGAGACGTACTGTTAAAAGTGCTCCCCAGAGCATTTGGTACGGACCTGAC     |
| EContig6479   | TTGCCTTCTGTATTGGTGTATCTACCGTATTTGCAAGTATCACAGGGATATTCAGAGCATGGAGGAAGTCGAGAAGAGGTACAAGGAGCA[T/C]TAGAAGATTCACTGGCTTAGCCATTCACTTGCATCGATAGTGAAGCATATTATGCATCTACCACTGCCATTATTTTTTCGTTTTACAGTTATGTTTACTGTTCT      |
| EContig6629   | AGTGGTTCAAACCTTGCTAAAAAGATAAAATAACTGAGAGCTCCGTTGTTATTCAATCCAACCTGGTGTATGCATCAATCTTAATAAAAATCGA[T/G]CTGGCATTTCGATGCTCACCAGAGCTCACCCTTGATTTTTGTCCTTTTCTTATTTCTTTGGGGTCTCATTTATGCTAGCAATGGTTACCCGCTGCAGTTTCCTTG |
| EContig6851   | TATTTTCTTGAAGGTGGATGTGGATGAACTAAAGGATGTTGCTAAAGAGTACAATGTTGAGGCCATGCCCACGTTTCGTGTTTCTCAAGGA[A/T]GGGAAAGAAGTGGATAGGCTCGTGGGTGCGAGGAAGGAAGATTTGCAGGCTACAATCACCAAGCATGCTACTGCTACTGCTACTGCTACTGCTAGTGCTTGAGGT    |

| Contig        | Sequence                                                                                                                                                                                                           |
|---------------|--------------------------------------------------------------------------------------------------------------------------------------------------------------------------------------------------------------------|
| EContig695_2  | AAGCTATCGTTGTTGCTCATATTGAAAACCTAGAGAGAAAAGTGAAAAACCCTCAGAAATGAAAAGAGATAGAAGAGAGAAAAGTAGTATC<br>[T/C]AAGCCGTAAGCGCCTTCGAAGCTTTTGCTTCTCCTCTTCCTTCGCTCTCTTCTTCTCCCCCGT                                                |
| EContig698_3  | GCTAAGGGCCCAAGGTTGTGGTATGGGAGTCGCAATGAATAGATTCATCAGTGGGGTGATCTTAATGTCATTTATATCCCTGTACCAGAG[<br>T/C]ATTACAATTGGAGGGGCTTCTTTTTATTTGCAGGGGTGGAATTATAGCTTGGATTTTCTTCTACACATTGCTACCTGAGACGCGGGG<br>AAGAAACCTAGAGGAT     |
| EContig6995   | TATTACGATGCTTGTATATTTCAATATATTTAGTTAAAAATAATAGATGGATAACCGTTATCCTCGAATCAAGATTACTGTTTGTAAATC[A/<br>G]TGCTTAATTCTTAATGCAATTCAGCAAGATATTTAATATTTTTTCTCTAGTCTATCTTACTGATCCAGCCAACAGTGAATAAATGCACAG<br>TGATCTTGCTCTCA    |
| EContig7442_2 | CGTCRATTGTCCACCGAAAGTGCTTCTAAGATGATAATCTATTTTCGTTGATGGTGAGTTCTTCTTTTCCTCATTATTCAGTTTTTCGTGT[T/C<br>]ATGATTCAAGTGAACCTCAGTTTGTGATGTGGACAAGTTTGAAGCGTGTTATGAAAGGAAGGGATGATGTAATTCTAAATTCCGTGTC<br>TCAGCCCGTCCAATT    |
| EContig749_1  | TATCTGTGATAGTTGTGCAGAGTCATCTGATTCTGGGTGGAGAAGTAGCTGTTTTCTTATGAAAGGTGGCAAGAATTCAAACAATGCAGA[<br>T/C]GCCCAAGGTGACAATTGAGAAGAAATGTTATCCGCAGAGACACCTTGCCTGAGCAAACCATGGATTTCTGCAATAAAGCATACACTT<br>CAGGAATGCTTTCAATA    |
| EContig8421_1 | CATAAACAAGCTAAGGCCTAAGGGTGAGTAGAGTTAAACGACACACAAATTACATCCAGCGCSAAGGGATCACCAGCAGCGTGTGTGAGA<br>[A/G]AGAAGGGGGAGAAAAATGACGCTAAAAGTGTATGCAGATCGGATGTCTCAACCTTCGCGTGCAGTAATTATCTTCTGCAAAATAAAT<br>GGGATTGAATTTGAAGAG   |
| EContig845_1  | TAATCCACCGTCCCGACCCAAATCCTACGACCCAGAAATCATAGCCATCAAGATGCCATGACTGCATGGTGTTCATTATTCTGCAAAA[T<br>/C]GACTTCGATAAATTCGTGGAGAGAAGCTGGCATTACAGATGTAGCAAAGTATGGAGGACCATCAGAGGGGAAGCTCTGGATGGAAGTC<br>AGGCTGAAAACACCGGG     |
| EContig86     | TCTTAACAGGAAGAGACCGTCAGTCCTCGCCCTGTCTCGTCAAAAAGCTGCCCCAGCTTGCTGGAACATCCATCGAAGGAGTAGAAAAGGG[<br>A/C]GGCTACATCATATCAGATAATTCATCCAGTAACAAGCCCGATGTCATTTTGATTGGAACAGGTTTCAGAGTTGGAAATTGCAGTTAAGG<br>CTGCTGACGAACTCAGA |
| EContig8662   | CTGGACGACATCGTCCAGCCCTTGAGCCTCTTTCAGAAAGTCGCTTATTCTTGGTCTCAAGAACACTAGCAGCAAGGAAAACAGCAAGAGC[<br>A/G]CCTCTTTGGTCTTTCCATCCAGTTTGACATTTTTCTCTCAAATTTCCATACTGCTTGAGCATCTTCTGTTTACTTTAGCTTCGTCAT<br>TTTTGTTGGTTCGA      |



| Contig        | Sequence                                                                                                                                                                                                  |
|---------------|-----------------------------------------------------------------------------------------------------------------------------------------------------------------------------------------------------------|
| EContig894_1  | GCTGCAAAAGAATCTCAAGGGAACAAATTACAACCTCTATGTTACAGTTACTTGAAATACGGTAGCAAGGCAGCTCGAGCTGAGATTTT[T/G]AAGGCTTCTAGAAACTCCACGAATCCTTGCATTTTGGAGGGATATGAAGGTACCTACACATATGGAGGAGTTGTTTATARAGTATCAGCTCCTCGAAAAGGTRCA   |
| EContig8993_1 | CGTCGATTATGCCTTCATTGTTGCACTCGTGGTCATTCTCGAGGAAATTAACGAGGACAGATCGGGTGAAGATTGAAATCACCATCAGAC[A/G]ATGATCGTGTTATTCCGTAAATGTAACCTCATCCATGTATTTGGATATTTCCCTTCAACCAATCATGTCAAATAAATGTAGAGTTGAAGGAGAGATCTGAGCCCG  |
| EContig9136_3 | CATACAGCAGGGCATATCTAATGGTTTACCAGATGTWGATTCCGGTTTTCTATTCAACTAGGAAGACCGGYTCGGTGCCATTTGATATAAG[A/G]TTTGATGAACAAGCACCAAAAGTTGCCTTGCCCCGAGATACTATGGTGCCTATAAATTCATTCAATACATTGTTTCATTATAATGCATTTGGGCTTTGATGCTT  |
| EContig9157_1 | GTGGCGGAGCCTGTGCCTGTACCTGTACTGACAGTTGATCAATAGAATGCTGAAAAAATCTACCGTGAACCTCTAATGTGTATCCCATCAG[T/C]GCCTTTCCTGTTTCTTTCAATTGTTACTCTCTGCCCTGCTTACCTCACCTTMTGCTGGTGAAATGGGTTTGGTGTGGATATTTTCATGTTTACATAAAGCCTGTT |
| EContig9302_3 | ATGAACTGAGGTGGCTYAAAGCCAAATATMAAATGCAGATGAGAGAGCTTAAATTTGGAGATCAACATAAGGGGATCGTGTCAAAATCTT[T/C]GACTTTGAAGTTCAATAACGAGAAGGATAAATTGTCACCGAGCTCCTCAAGTATGTCGCCAGAAGAGAAGCGTTCKACCTCATTTTTCCGGCTGATGCAGAAAA   |
| EContig9302_4 | CGTGTCAAAATCTTYGACTTTGAAGTTCAATAACGAGAAGGATAAATTGTCACCGAGCTCCTCAAGTATGTCGCCAGAAGAGAAGCGTTC[T/G]ACCTCATTTTTCCCGGCTGATGCAGAAAACAACGTGCTAACCAGAAAGTTCACAGTTATGAATCTGTTTATAATTCTTTTAGTCCAGTACATATGATCACTGCA   |
| EContig9677   | TCGACACGAGGTTGAATCTGATTCTATGACATCCATTCAGGATAGAGGGAAACAAATCCGGAGTCCCAGGGAAGTAATGGATAACTGTCC[C/G]GAATTGAAGGAAGCATCAAAGGAGAACATCAAAGACAGTGTTGATACCGATTCAGAATTAAGGAATTTTCGATCTGAATGCTGGAGTGATGAGGTTGCAGATAAG  |
| EContig9922_3 | CTGAGTGGTCAAAACTTGCCCRGAAGGCCAGAGTTTAAAYGCATGTATTGACAATTGAGGTTTGATTACTGCAATTGTTCTATATTGGGTG[T/C]TACTGAGGCATTTGTTTGAATTTGAGTTGTATCTTTTGACTAGGATTTCTTGCTAAGGCATGTT                                          |
| IContig1226_3 | AGGCCTGGTTGGTGAAATCATTGGCAGGTTTGAGAAGAAAGGCTTCACTTTGAAAGGTTTAAAGYTCATCACTGTGGATCGCCATTTTGC[T/C]GAGCAGCATTATGCTGACTTGTCTGCAAAGCCTTTCTTTAATGGGCTTGTTGAGTATATCATCTCTGGCCCAGTTACGGCTATGGTTTGGAGGGTAAGAATGTG   |

| Contig        | Sequence                                                                                                                                                                                                   |
|---------------|------------------------------------------------------------------------------------------------------------------------------------------------------------------------------------------------------------|
| IContig125_1  | TTCCTTAGTTTTGCTCTTCAGTTTAAGCTTTGCTCAACAGCAGCTAAAGGGCCAGTGCCAAATCCAAAAAATCAATGCCCTTCAGCCCCA[A/G]TACAAAATTCAATCCGAAGGTGGAGTCACTGAGTCCATGATTACAATGATGATCAGTTCCGGTGCGCCGGTGCCGCCTTTTTACGCCATACAATTTACCGCAGA    |
| IContig1260_3 | AGTCAAGGACGACATGTTCTGCTTGTTTGAAGGAGCGCTCCACAACCTTGGGGAGTCTGAAACAACAATACGGCCTTGCAAAGTCTGCCAA[T/C]GAGGTACTTTTGGTGATTGAAGCCTACAAGGCACTTCGTGACAGGGCACCTTACCCTGCAAACCGAGTGGTTGGCCACCTCGAGGGGARTTTTCGCGTTCATGGTA |
| IContig19_3   | TATGCTGGACTTTGTGCGACGATGCTGAGAAGCYGCACCACCCGTGCGGGGCGTATATTCGGGACACAAAGGCCATGAAAGCTACACCAGC[A/G]GACATCATAGAATACCCAAATGCTTACCATTTTGTGGTGGATATGCCAGGGCTGAAAGTTGATCAAATCAAGGTACACATAGAGGAMGGCAATGTCCTGGTGGTG  |
| IContig2083_2 | TGATGGGAGCTGCTTGACACATTTTAATTTTATCTGTGTTTTGGGTGCTGGAAATTATTAGACATTTATGAGCCAACACTATGGGAAC[C/G]TAGACTATTTGGTTCCATTGGTTTAATGATTGTAGTCCTATGATTTTGTGTTGTGTAATACAGTATATTTCTTTTAATCTTATAGTAACTTTGATGTG            |
| IContig2350_3 | TACCATTTCTGGTACCGGAATCCAGTTCAAGAGATCAAAAACGTCAAAATAGGAGGAATTCTAGGTGGGCTACCCGAAATCGGGTTTCCC[A/C]ATTGGGAGAAGCTCAGGTTATGAGGAAAGCTGAGTTGGGTTTTGCGAAAGAAGAGGACTCTGCGGGTAGTTTTGACCAAGCATTGAACCTGATCTGAAAAATGA    |
| IContig257_8  | CCTGCAAACCTGGAAACCTGRAGAGCCCGTGGTRATTGCTCCGAGTGTGTGCGAACGAAGAGGCTAAAAAGATGTTYCCACAGGGTTTCGAC[A/G]CTGCTGATCTTCCTTCGGGGAAGGATTACCTGCGATTACAAATGTCTGAGCATATACATATACATATATCTGCAATTCGGAATTGTC TGAATATTACTAGTAA  |
| IContig2640_3 | CTTACAGCAGGACTGATTAGCTTCAGGCRGGGAAATTCACATTTAGGTCAAAAGCTAATGAGAGCTCGTGTGGTCGTCCAAGGCGCGACT[A/G]TTGCCCTTATGGTTGGGACTGCTTATTACTATGGGGAGAAATTTAACTTGTACTAGAGTATGAACTGCCAATGATTACCATGTTCAATCATATAGTGTACTAGT    |
| IContig2753_2 | GCTCAGGCTGCTGGTCGTGGTGCTGCGCCTGGCAGGGGTGCTGTTCCACCAGTGAGGAGGTGATCACTTCCCTGATTTGGTGTCTCACTT[T/C]GAAGTGTCGTGTCGACAAGTGATAATCCTTGTTTCCAATGATAAAATTGTCAGTGGTGTACAATGAATTAACCTTCTTCCAACGATTAC TTAAGATGGTTTTCA   |
| IContig2783_3 | TTTCTCGACATTGAGCGCGTGTGATCCTGCCTTTGCTGCACAACAGATTGCTGAGATAGCCGAAGGTGATAGTCGGGGACTAGCACTTCT[A/G]ATTCCGATCATTCCGGCCATAGCTTGGGTACTCTACAACATCCTGCAACCAGCACTTAACCAGATCAACAAAATGAGAAGCGCCAAAGGAGTTATTGTSGGACTC   |

| Contig        | Sequence                                                                                                                                                                                                    |
|---------------|-------------------------------------------------------------------------------------------------------------------------------------------------------------------------------------------------------------|
| IContig2981_4 | TACTTGAAAAGTACTATGGGGAAGCCRCAGCGTATTTTTTAAGAAGATATACATCTCAGCCACAACGTGTTTTGGGAGAATTGTACGAGTT[T/C]AAATAATTAAATGTTTCCAAAGACGAGTTTTGAATGTCATCATCTTGTTTCGTCATGGACGTTGTTTCCCTCAATGTTTCTGGGTGAA GCTTACTATTATTAA    |
| IContig3160_2 | AAAACATACGAGATATTCGTCGGAGTATGATGAGCGGTGGAGATCAATCGAACAAGCAAGACAACGTAAAACCAATTGAAGATAAGCCG C[C/G]GGCGCCCGTGGTGGCTTGGAATCCGTTGTTTCAACCAGAAGATTTTCATGGATGATCCGCCGCAAACGCCTCTTAATTTTACAGCTCA ATTAGATTCCGGCGGCCA |
| IContig353    | ACCGGTCGCCGGCGGGCGAAAAGAGTGAACCCAAGGATGAGAAGGTGGAGATAACTCATGTATTTCCGTCAGATGACAAGCCCGGAACTC [A/G]TAAAGTTGTCGGTGAAGCTGTTGGCAAGGTGGTCGAAAATGTCCAGTCGGCAAAGGAAGCAATGTCTAAGACCCAAAAAACTGAGT AATATACGAGAAAAATTC   |
| IContig3651   | GCCTCATCTAGATCCATCATCTGGCAGAATGAAAGAAGTCGTTGATTACAGAGTCCTATCTCCAGGAGACCTAGCCAACCTCTGTGATGAC[ T/C]GAAGGGGGATGGTCCGACTTCCTGTGCATGAGAAAGGAAGCTCAGCCAGCTCTGGATCTTGCACTTATTTTTGTAGGAGAACAGTTGC AGTCTCTGGATATATCT |
| IContig52_2   | GCAGCAGCTCTACCACTGCAAGATGTATTTAACTCAACGGAGTCCATCTGAAAAAATTTCACTCAGAAGTTYCAAGAACCTACAAACAGA[ C/G]GAGCATCTCAACGATTGCTGCCAACAAATTGGAAAAAATCAAGGAGGGTTGCAGGYGCAGAAACCTGAAGCGAGTTGTGCAGCAGCAA CAGCAGGAAGAAGGAAGC |
| IContig667_1  | ACGGCCGGGGGCATTCAATTCATATATAGCTTCTCTAATATTTTGAAAATTCAAG[A/G]GAGTTTGCAAATGGCTGAGCAGTATCAGCAAC AACATTATGGGCAACAGCAGAAGGGTCAGCAGCAGCAACAGAAGCAGCCGGTGTCCCACCAGGTGGTGAAAGCGGCGACAGGCGCCACA GCCGGCGGTTCCCTCCTGG  |
