# Supplementary material for: Utility of EST-SNP Markers for Improving Management and Use of Olive Genetic Resources: A Case Study at the Worldwide Olive Germplasm Bank of Córdoba
Source: MDPI journal article supplement (doi:10.3390/plants11070921), 2022-03-29
Supplement: s1 [file s1]

**Supplemental Table S5:** Diversity parameters of the 96 EST-SNPs genotyped in the 668 non-redundant genotypes\*

| <b>Locus</b>   | <b>N</b> | <b><math>N_{avg}</math></b> | <b><math>N_e</math></b> | <b><math>I</math></b> | <b><math>H_o</math></b> | <b><math>H_e</math></b> | <b><math>MAF</math></b> | <b><math>PIC^{**}</math></b> |
|----------------|----------|-----------------------------|-------------------------|-----------------------|-------------------------|-------------------------|-------------------------|------------------------------|
| EContig10374   | 668      | 2,000                       | 1,774                   | 0,628                 | 0,502                   | 0,436                   | 0,47231                 | 0,341                        |
| EContig10531   | 668      | 2,000                       | 1,994                   | 0,692                 | 0,523                   | 0,498                   | 0,25187                 | 0,374                        |
| EContig10539   | 668      | 2,000                       | 1,782                   | 0,631                 | 0,522                   | 0,439                   | 0,47754                 | 0,343                        |
| EContig10640   | 666      | 2,000                       | 1,812                   | 0,640                 | 0,495                   | 0,448                   | 0,31811                 | 0,348                        |
| EContig10787_1 | 668      | 2,000                       | 1,800                   | 0,637                 | 0,499                   | 0,444                   | 0,38323                 | 0,346                        |
| EContig1180_2  | 664      | 2,000                       | 1,894                   | 0,665                 | 0,478                   | 0,472                   | 0,43413                 | 0,361                        |
| EContig12203_1 | 630      | 2,000                       | 1,764                   | 0,625                 | 0,352                   | 0,433                   | 0,38906                 | 0,339                        |
| EContig12584   | 667      | 2,000                       | 1,997                   | 0,693                 | 0,563                   | 0,499                   | 0,32111                 | 0,375                        |
| EContig1263    | 666      | 2,000                       | 1,734                   | 0,615                 | 0,462                   | 0,423                   | 0,3735                  | 0,334                        |
| EContig1372_4  | 666      | 2,000                       | 1,633                   | 0,576                 | 0,445                   | 0,388                   | 0,45502                 | 0,313                        |
| EContig1634    | 667      | 2,000                       | 1,728                   | 0,612                 | 0,463                   | 0,421                   | 0,42748                 | 0,333                        |
| EContig1775_5  | 662      | 2,000                       | 1,679                   | 0,594                 | 0,463                   | 0,404                   | 0,4753                  | 0,323                        |
| EContig181_2   | 667      | 2,000                       | 1,993                   | 0,691                 | 0,460                   | 0,498                   | 0,33308                 | 0,374                        |
| EContig1813_3  | 668      | 2,000                       | 1,986                   | 0,690                 | 0,670                   | 0,496                   | 0,43713                 | 0,373                        |
| EContig1816_1  | 667      | 2,000                       | 1,971                   | 0,686                 | 0,654                   | 0,493                   | 0,36036                 | 0,371                        |
| EContig1839    | 667      | 2,000                       | 1,961                   | 0,683                 | 0,554                   | 0,490                   | 0,48952                 | 0,370                        |
| EContig188     | 667      | 2,000                       | 1,606                   | 0,565                 | 0,436                   | 0,377                   | 0,34656                 | 0,306                        |
| EContig1947_3  | 668      | 2,000                       | 1,969                   | 0,685                 | 0,543                   | 0,492                   | 0,38275                 | 0,371                        |
| EContig1962_1  | 668      | 2,000                       | 1,880                   | 0,661                 | 0,565                   | 0,468                   | 0,38235                 | 0,359                        |
| EContig1987_2  | 668      | 2,000                       | 1,808                   | 0,639                 | 0,423                   | 0,447                   | 0,32485                 | 0,347                        |
| EContig2068_2  | 668      | 2,000                       | 2,000                   | 0,693                 | 0,465                   | 0,500                   | 0,49925                 | 0,375                        |
| EContig2172_2  | 667      | 2,000                       | 1,744                   | 0,618                 | 0,485                   | 0,427                   | 0,19611                 | 0,336                        |
| EContig2305_1  | 666      | 2,000                       | 1,955                   | 0,682                 | 0,483                   | 0,489                   | 0,45045                 | 0,369                        |
| EContig2458_2  | 650      | 2,000                       | 1,864                   | 0,656                 | 0,462                   | 0,463                   | 0,43713                 | 0,356                        |
| EContig2514    | 668      | 2,000                       | 1,967                   | 0,685                 | 0,507                   | 0,492                   | 0,38253                 | 0,371                        |
| EContig2705_2  | 664      | 2,000                       | 1,920                   | 0,672                 | 0,492                   | 0,479                   | 0,33757                 | 0,364                        |
| EContig2785_2  | 668      | 2,000                       | 1,998                   | 0,693                 | 0,652                   | 0,500                   | 0,47081                 | 0,375                        |
| EContig2906_2  | 668      | 2,000                       | 1,819                   | 0,643                 | 0,493                   | 0,450                   | 0,30689                 | 0,349                        |
| EContig2937_4  | 667      | 2,000                       | 1,401                   | 0,460                 | 0,295                   | 0,286                   | 0,35263                 | 0,245                        |
| EContig2950_2  | 661      | 2,000                       | 1,598                   | 0,562                 | 0,329                   | 0,374                   | 0,39752                 | 0,304                        |
| EContig298_1   | 668      | 2,000                       | 1,996                   | 0,692                 | 0,504                   | 0,499                   | 0,46632                 | 0,374                        |
| EContig2998    | 668      | 2,000                       | 1,999                   | 0,693                 | 0,698                   | 0,500                   | 0,33784                 | 0,375                        |
| EContig3075    | 667      | 2,000                       | 1,756                   | 0,622                 | 0,537                   | 0,431                   | 0,48503                 | 0,338                        |
| EContig3144_2  | 666      | 2,000                       | 1,856                   | 0,654                 | 0,373                   | 0,461                   | 0,25655                 | 0,355                        |
| EContig3225_1  | 667      | 2,000                       | 1,983                   | 0,689                 | 0,573                   | 0,496                   | 0,4512                  | 0,373                        |
| EContig3597_1  | 668      | 2,000                       | 1,462                   | 0,496                 | 0,327                   | 0,316                   | 0,32175                 | 0,266                        |
| EContig3889    | 668      | 2,000                       | 1,993                   | 0,691                 | 0,519                   | 0,498                   | 0,28097                 | 0,374                        |
| EContig3935_2  | 668      | 2,000                       | 1,958                   | 0,682                 | 0,480                   | 0,489                   | 0,30885                 | 0,370                        |
| EContig4112    | 668      | 2,000                       | 2,000                   | 0,693                 | 0,525                   | 0,500                   | 0,42665                 | 0,375                        |
| EContig4297_2  | 668      | 2,000                       | 1,881                   | 0,661                 | 0,414                   | 0,468                   | 0,39955                 | 0,359                        |
| EContig435_10  | 664      | 2,000                       | 1,814                   | 0,641                 | 0,493                   | 0,449                   | 0,23802                 | 0,348                        |
| EContig4380_1  | 611      | 2,000                       | 1,997                   | 0,692                 | 0,649                   | 0,499                   | 0,39446                 | 0,375                        |
| EContig4424_1  | 668      | 2,000                       | 1,769                   | 0,626                 | 0,477                   | 0,435                   | 0,40344                 | 0,340                        |
| EContig4490    | 649      | 2,000                       | 1,618                   | 0,570                 | 0,388                   | 0,382                   | 0,31667                 | 0,309                        |
| EContig460_6   | 651      | 2,000                       | 1,953                   | 0,681                 | 0,513                   | 0,488                   | 0,34281                 | 0,369                        |

| Locus         | N   | $N_{avg}$ | $N_e$ | $I$   | $H_o$ | $H_e$ | MAF     | PIC** |
|---------------|-----|-----------|-------|-------|-------|-------|---------|-------|
| EContig465    | 668 | 2,000     | 1,999 | 0,693 | 0,555 | 0,500 | 0,42243 | 0,375 |
| EContig4794   | 668 | 2,000     | 1,741 | 0,617 | 0,432 | 0,426 | 0,44378 | 0,335 |
| EContig504_6  | 667 | 2,000     | 1,923 | 0,673 | 0,554 | 0,480 | 0,38772 | 0,365 |
| EContig5140   | 663 | 2,000     | 1,831 | 0,646 | 0,566 | 0,454 | 0,47076 | 0,351 |
| EContig515_2  | 666 | 2,000     | 1,953 | 0,681 | 0,600 | 0,488 | 0,42492 | 0,369 |
| EContig515_3  | 668 | 2,000     | 1,614 | 0,568 | 0,425 | 0,381 | 0,49775 | 0,308 |
| EContig5168_5 | 668 | 2,000     | 1,902 | 0,667 | 0,534 | 0,474 | 0,42342 | 0,362 |
| EContig5183   | 667 | 2,000     | 1,780 | 0,630 | 0,406 | 0,438 | 0,37856 | 0,342 |
| EContig5193   | 668 | 2,000     | 1,512 | 0,522 | 0,375 | 0,339 | 0,33458 | 0,281 |
| EContig5258   | 655 | 2,000     | 1,960 | 0,683 | 0,476 | 0,490 | 0,36069 | 0,370 |
| EContig526_2  | 668 | 2,000     | 1,789 | 0,633 | 0,498 | 0,441 | 0,48126 | 0,344 |
| EContig5399_1 | 667 | 2,000     | 1,918 | 0,672 | 0,635 | 0,479 | 0,17241 | 0,364 |
| EContig5478_1 | 668 | 2,000     | 1,897 | 0,666 | 0,453 | 0,473 | 0,34842 | 0,361 |
| EContig5674_1 | 668 | 2,000     | 1,828 | 0,645 | 0,532 | 0,453 | 0,37575 | 0,350 |
| EContig6361   | 665 | 2,000     | 1,841 | 0,649 | 0,523 | 0,457 | 0,37725 | 0,352 |
| EContig6479   | 668 | 2,000     | 1,570 | 0,549 | 0,390 | 0,363 | 0,45808 | 0,297 |
| EContig6629   | 667 | 2,000     | 1,889 | 0,663 | 0,482 | 0,471 | 0,36462 | 0,360 |
| EContig6851   | 668 | 2,000     | 1,693 | 0,599 | 0,472 | 0,409 | 0,37425 | 0,326 |
| EContig695_2  | 666 | 2,000     | 1,980 | 0,688 | 0,468 | 0,495 | 0,32384 | 0,372 |
| EContig698_3  | 666 | 2,000     | 1,981 | 0,688 | 0,495 | 0,495 | 0,28668 | 0,373 |
| EContig6995   | 667 | 2,000     | 1,975 | 0,687 | 0,567 | 0,494 | 0,3203  | 0,372 |
| EContig7442_2 | 665 | 2,000     | 1,995 | 0,692 | 0,532 | 0,499 | 0,34522 | 0,374 |
| EContig749_1  | 664 | 2,000     | 2,000 | 0,693 | 0,549 | 0,500 | 0,30405 | 0,375 |
| EContig8421_1 | 668 | 2,000     | 1,883 | 0,662 | 0,457 | 0,469 | 0,24962 | 0,359 |
| EContig845_1  | 668 | 2,000     | 1,966 | 0,684 | 0,567 | 0,491 | 0,25599 | 0,371 |
| EContig86     | 661 | 2,000     | 1,896 | 0,665 | 0,452 | 0,473 | 0,36751 | 0,361 |
| EContig8662   | 668 | 2,000     | 1,869 | 0,658 | 0,553 | 0,465 | 0,42954 | 0,357 |
| EContig894_1  | 644 | 2,000     | 1,921 | 0,672 | 0,285 | 0,479 | 0,44003 | 0,364 |
| EContig8993_1 | 666 | 2,000     | 1,953 | 0,681 | 0,550 | 0,488 | 0,43563 | 0,369 |
| EContig9136_3 | 668 | 2,000     | 1,915 | 0,671 | 0,484 | 0,478 | 0,33886 | 0,364 |
| EContig9157_1 | 667 | 2,000     | 1,649 | 0,583 | 0,440 | 0,394 | 0,32784 | 0,316 |
| EContig9302_3 | 668 | 2,000     | 1,803 | 0,638 | 0,428 | 0,445 | 0,47594 | 0,346 |
| EContig9302_4 | 665 | 2,000     | 1,772 | 0,627 | 0,518 | 0,436 | 0,4274  | 0,341 |
| EContig9677   | 668 | 2,000     | 1,995 | 0,692 | 0,487 | 0,499 | 0,47305 | 0,374 |
| EContig9922_3 | 668 | 2,000     | 1,969 | 0,685 | 0,549 | 0,492 | 0,26276 | 0,371 |
| IContig1226_3 | 668 | 2,000     | 1,958 | 0,682 | 0,492 | 0,489 | 0,48653 | 0,370 |
| IContig125_1  | 662 | 2,000     | 1,775 | 0,628 | 0,448 | 0,437 | 0,38623 | 0,341 |
| IContig1260_3 | 667 | 2,000     | 1,990 | 0,691 | 0,699 | 0,498 | 0,42192 | 0,374 |
| IContig19_3   | 668 | 2,000     | 1,904 | 0,668 | 0,516 | 0,475 | 0,42665 | 0,362 |
| IContig2083_2 | 668 | 2,000     | 1,887 | 0,663 | 0,456 | 0,470 | 0,42954 | 0,360 |
| IContig2350_3 | 667 | 2,000     | 1,961 | 0,683 | 0,518 | 0,490 | 0,39759 | 0,370 |
| IContig257_8  | 667 | 2,000     | 1,908 | 0,669 | 0,493 | 0,476 | 0,482   | 0,363 |
| IContig2640_3 | 663 | 2,000     | 1,895 | 0,665 | 0,617 | 0,472 | 0,3973  | 0,361 |
| IContig2753_2 | 668 | 2,000     | 1,957 | 0,682 | 0,610 | 0,489 | 0,49548 | 0,369 |
| IContig2783_3 | 668 | 2,000     | 1,991 | 0,691 | 0,644 | 0,498 | 0,46477 | 0,374 |
| IContig2981_4 | 668 | 2,000     | 1,928 | 0,674 | 0,478 | 0,481 | 0,40719 | 0,366 |
| IContig3160_2 | 664 | 2,000     | 1,858 | 0,654 | 0,519 | 0,462 | 0,30135 | 0,355 |

| <b>Locus</b>        | <b>N</b>     | <b><math>N_{avg}</math></b> | <b><math>N_e</math></b> | <b><math>I</math></b> | <b><math>H_o</math></b> | <b><math>H_e</math></b> | <b>MAF</b>   | <b>PIC**</b> |
|---------------------|--------------|-----------------------------|-------------------------|-----------------------|-------------------------|-------------------------|--------------|--------------|
| <b>IContig353</b>   | 659          | 2,000                       | 1,826                   | 0,645                 | 0,485                   | 0,452                   | 0,31334      | 0,350        |
| <b>IContig3651</b>  | 668          | 2,000                       | 1,995                   | 0,692                 | 0,601                   | 0,499                   | 0,21557      | 0,374        |
| <b>IContig52_2</b>  | 668          | 2,000                       | 1,933                   | 0,676                 | 0,625                   | 0,483                   | 0,26987      | 0,366        |
| <b>IContig667_1</b> | 667          | 2,000                       | 1,780                   | 0,630                 | 0,448                   | 0,438                   | 0,32459      | 0,342        |
| <b>MEAN</b>         | <b>664,9</b> | <b>2,000</b>                | <b>1,862</b>            | <b>0,652</b>          | <b>0,501</b>            | <b>0,460</b>            | <b>0,380</b> | <b>0,353</b> |

\*N = Number of non-redundant genotypes ;  $N_{avg}$  = Average number of observed alleles ;  $N_e$  = Number of effective alleles ;  $I$  = Shannon's Information Index ;  $H_o$  = Observed Heterozygosity ;  $H_e$  = Expected Heterozygosity ; MAF = Minor Allele Frequency ; PIC = Polymorphic Information Content ;

\*\*Calculated by CERVUS v.3.0 software following Marshall *et al.* (1998) [72], while the rest of the data were calculated by GenAlex 6.5 software following Peakall and Smouse (2012) [71].
