# Supplementary material for: Utility of EST-SNP Markers for Improving Management and Use of Olive Genetic Resources: A Case Study at the Worldwide Olive Germplasm Bank of Córdoba
Source: MDPI journal article supplement (doi:10.3390/plants11070921), 2022-03-29
Supplement: s1 [file s1]

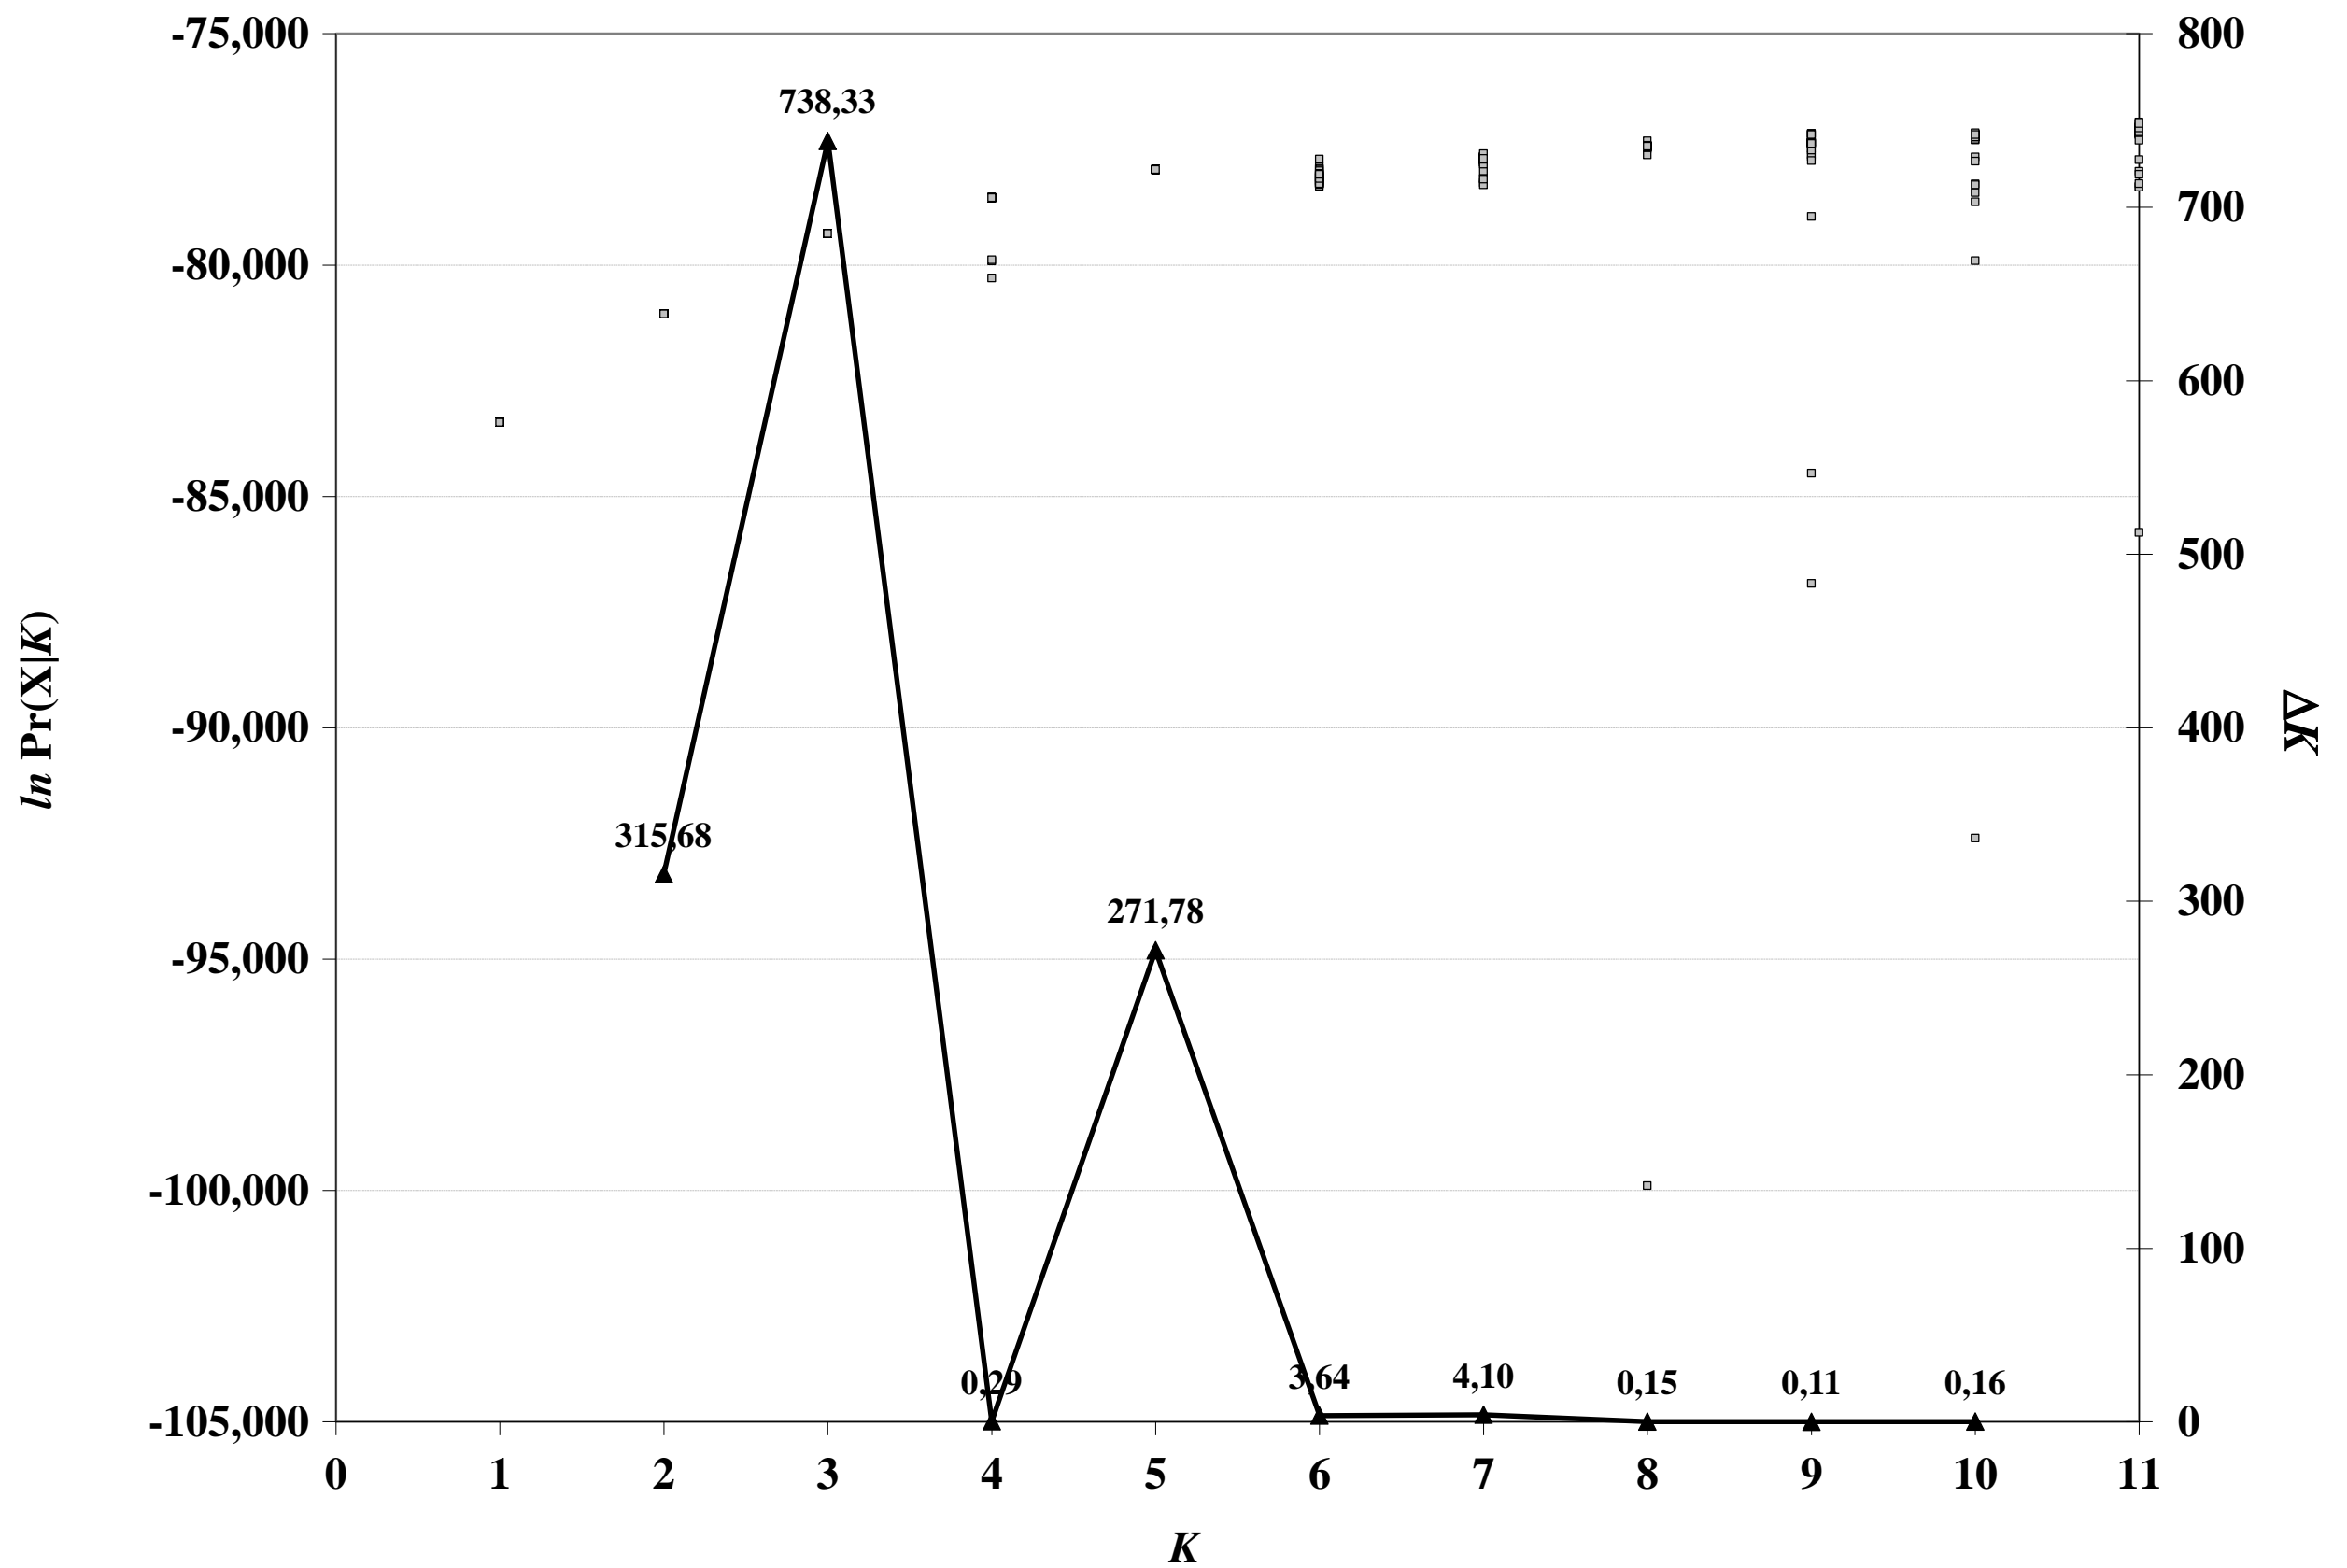

**Supplemental Figure S2:** Log-likelihood values for the data conditional of  $K$ ,  $\ln \Pr(X|K)$ , as suggested by Pritchard *et al.* (2000)[75], and on  $\Delta K$  values.
