# Supplementary material for: Utility of EST-SNP Markers for Improving Management and Use of Olive Genetic Resources: A Case Study at the Worldwide Olive Germplasm Bank of Córdoba
Source: Plants (Basel). 2022 Mar 29;11(7):921. doi: 10.3390/plants11070921 (PMC9002360; doi:10.3390/plants11070921)
Supplement: Supplementary file 1 [file plants-11-00921-s001.zip]

Archive with 9 entries (9 files):
- Fig S2_revised.pdf
- Figure S1.pdf
- Table S1_revised.pdf
- Table S2.pdf
- Table S3_revised.pdf
- Table S4_revised.pdf
- Table S5_revised.pdf
- Table S6.pdf
- Table S7_revised.pdf
